# Supplementary material
Source: PubMed Central journal article supplement (PMC6324422)

## Supplementary Online Content

Zhang FF, Liu J, Rehm CD, Wilde P, Mande JR, Mozaffarian D. Trends and disparities in diet quality among US adults by Supplemental Nutrition Assistance Program participation status. *JAMA Netw Open*. 2018;1(2):e180237. doi:10.1001/jamanetworkopen.2018.0237

**eTable 1.** Trends in SNAP Participation and Sociodemographic Characteristics of US Adults by SNAP Participation Status, 1999-2014

**eTable 2.** Trends in Dietary Intake of Key Food Groups and Nutrients Among US Adults by SNAP Participation Status, 1999-2014

**eTable 3.** Adjusted Trends in the American Heart Association (AHA) 2020 Diet Score by SNAP Participation Status, 2003-2014

**eTable 4.** Adjusted Trends in AHA Diet Score Among US Adults by SNAP Participation Status, 2003-2014

**eTable 5.** Adjusted Trends in Percentages of Having Poor, Intermediate, and Ideal Diet Among US Adults by SNAP Participation Status, 2003-2014

**eTable 6.** Adjusted Trends in Dietary Intake of Key Food Groups and Nutrients Among US Adults by SNAP Participation Status, 1999-2014

**eTable 7.** Crude and Adjusted Trends in the American Heart Association (AHA) 2020 Diet Score by SNAP Participation Status, 2003-2014

**eTable 8.** Mean Change in Dietary Components of the American Heart Association (AHA) 2020 Strategic Impact Goals Among SNAP Participants From 1999-2002 to 2011-2014, by Age

**eTable 9.** Mean Change in Dietary Components of the American Heart Association (AHA) 2020 Strategic Impact Goals Among SNAP Participants From 1999-2002 to 2011-2014, by Gender

**eTable 10.** Mean Change in Dietary Components of the American Heart Association (AHA) 2020 Strategic Impact Goals Among SNAP Participants From 1999-2002 to 2011-2014, by Race/Ethnicity

**eTable 11.** Mean Change in Dietary Components of the American Heart Association (AHA) 2020 Strategic Impact Goals Among SNAP Participants From 1999-2002 to 2011-2014, by Education

**eFigure 1.** Percent Change in Intake of AHA Dietary Components and Other Key Food Groups and Nutrients Among US Adults by SNAP Participation Status From 1999-2000 to 2013-2014

**eFigure 2.** Percent of US Adults Meeting Dietary Recommendations for AHA 2020 Strategic Goals and Other Key Food Groups and Nutrients by SNAP Participation Status, 2013-2014

This supplementary material has been provided by the authors to give readers additional information about their work.

**eTable 1.** Trends in SNAP Participation and Sociodemographic Characteristics of U.S. Adults by SNAP Participation Status, 1999-2014

| Characteristics                  | 1999-2000         | 2001-2002         | 2003-2004         | 2005-2006         | 2007-2008         | 2009-2010         | 2011-2012         | 2013-2014         | P for trend |
|----------------------------------|-------------------|-------------------|-------------------|-------------------|-------------------|-------------------|-------------------|-------------------|-------------|
| N, Survey-Weighted % (95% CI)    |                   |                   |                   |                   |                   |                   |                   |                   |             |
| <b>SNAP participation status</b> |                   |                   |                   |                   |                   |                   |                   |                   |             |
| SNAP participants                | 423               | 417               | 573               | 490               | 858               | 1,158             | 1,135             | 1,108             | <0.001      |
| Income-eligible nonparticipants  | 8.6 (6.5, 11.4)   | 8.1 (6.2, 10.4)   | 10.5 (8.2, 13.3)  | 8.0 (6.2, 10.3)   | 11.5 (9.2, 14.2)  | 14.1 (11.4, 17.2) | 17.4 (13.7, 21.9) | 17.3 (14.3, 20.8) | 0.08        |
| Higher-Income Individuals        | 825               | 884               | 784               | 788               | 882               | 945               | 785               | 799               | 0.003       |
|                                  | 15.3 (11.5, 20.1) | 14.3 (12.4, 16.6) | 12.9 (10.8, 15.2) | 12.0 (10.3, 14.0) | 11.4 (9.5, 13.6)  | 11.1 (9.4, 13.2)  | 12.9 (10.8, 15.3) | 12.3 (10.4, 14.6) |             |
|                                  | 2984              | 3,443             | 3,029             | 3,195             | 3,644             | 3,607             | 2,854             | 3,086             |             |
|                                  | 76.0 (70.7, 80.7) | 77.6 (74.9, 80.1) | 76.6 (72.1, 80.6) | 80.0 (76.9, 82.7) | 77.1 (73.1, 80.7) | 74.8 (71.8, 77.5) | 69.7 (64.3, 74.7) | 70.3 (65.0, 75.2) |             |
| Survey-Weighted % (95% CI)       |                   |                   |                   |                   |                   |                   |                   |                   |             |
| <b>Age, y, Mean (95% CI)</b>     |                   |                   |                   |                   |                   |                   |                   |                   |             |
| SNAP participants                | 41.4              | 39.0              | 40.3              | 39.3              | 40.4              | 41.8              | 42.9              | 42.5              | 0.003       |
| Income-eligible nonparticipants  | (39.0, 43.8)      | (36.8, 41.2)      | (38.4, 42.3)      | (37.2, 41.3)      | (38.7, 42.1)      | (41.0, 42.6)      | (41.3, 44.6)      | (40.8, 44.2)      | 0.80        |
| Higher-Income Individuals        | 44.0              | 45.1              | 45.1              | 47.7              | 45.1              | 43.8              | 43.6              | 44.8              | <0.001      |
|                                  | (40.8, 47.2)      | (43.2, 47.0)      | (43.3, 46.8)      | (44.9, 50.4)      | (41.7, 48.4)      | (41.1, 46.5)      | (35.6, 51.6)      | (42.9, 46.8)      |             |
|                                  | 45.8              | 46.3              | 47.6              | 47.5              | 47.9              | 48.5              | 49.2              | 49.2              |             |
|                                  | (44.7, 46.8)      | (45.1, 47.5)      | (46.5, 48.8)      | (46.1, 48.9)      | (47.0, 48.8)      | (47.5, 49.5)      | (47.6, 50.8)      | (48.2, 50.3)      |             |
| <b>% Male</b>                    |                   |                   |                   |                   |                   |                   |                   |                   |             |
| SNAP participants                | 36.6              | 36.3              | 36.5              | 36.9              | 39.6              | 42.7              | 46.6              | 45.2              | <0.001      |
| Income-eligible nonparticipants  | (30.8, 42.4)      | (30.8, 41.8)      | (32.7, 40.3)      | (32.0, 41.7)      | (35.4, 43.8)      | (40.4, 45.1)      | (42.9, 50.3)      | (41.7, 48.6)      | 0.02        |
| Higher-Income Individuals        | 42.4              | 43.1              | 45.2              | 46.9              | 42.4              | 46.6              | 47.4              | 47.5              | 0.40        |
|                                  | (38.4, 46.6)      | (38.2, 48.1)      | (41.4, 49.2)      | (42.4, 51.4)      | (38.8, 46.1)      | (43.2, 50.0)      | (43.9, 51.0)      | (44.4, 50.7)      |             |
|                                  | 50.1              | 50.4              | 50                | 49.2              | 48.9              | 49.4              | 49.4              | 49.5              |             |
|                                  | (47.7, 52.5)      | (48.7, 52.1)      | (48.1, 51.8)      | (47.6, 50.8)      | (47.6, 50.1)      | (47.7, 51.0)      | (47.0, 51.8)      | (47.6, 51.3)      |             |
| <b>% Non-Hispanic White</b>      |                   |                   |                   |                   |                   |                   |                   |                   |             |
| SNAP participants                | 45.8              | 47.2              | 51.6              | 48.1              | 46.1              | 46.5              | 48.5              | 49.9              | 0.81        |
| Income-eligible nonparticipants  | (36.1, 55.6)      | (36.0, 58.5)      | (35.3, 67.9)      | (36.8, 59.4)      | (28.4, 63.8)      | (34.2, 58.8)      | (35.3, 61.8)      | (39.6, 60.2)      | 0.42        |
| Higher-Income Individuals        | 58.2              | 55.7              | 60                | 57.6              | 56.7              | 50.1              | 57                | 52.0              | 0.06        |
|                                  | (45.4, 70.0)      | (45.1, 65.8)      | (44.5, 73.8)      | (48.7, 66.0)      | (43.8, 68.7)      | (41.9, 58.4)      | (43.8, 69.3)      | (40.2, 63.5)      |             |
|                                  | 75.9              | 77.8              | 78.1              | 77.7              | 75.8              | 75.8              | 72.8              | 72.2              |             |
|                                  | (72.0, 79.4)      | (73.5, 81.5)      | (72.1, 83.2)      | (72.0, 82.4)      | (69.3, 81.3)      | (69.2, 81.3)      | (65.9, 78.8)      | (66.4, 77.3)      |             |
| <b>% Non-Hispanic Black</b>      |                   |                   |                   |                   |                   |                   |                   |                   |             |
| SNAP participants                | 19.6              | 29.1              | 28.7              | 33.2              | 26.9              | 24.4              | 25.2              | 22.0              | 0.48        |
| Income-eligible nonparticipants  | (10.4, 28.8)      | (17.1, 41.1)      | (20.0, 37.4)      | (24.0, 42.3)      | (15.3, 38.5)      | (19.4, 29.5)      | (15.9, 34.6)      | (15.8, 28.2)      | 0.73        |
| Higher-Income Individuals        | 12.0              | 14.8              | 12.0              | 13.7              | 10.9              | 13.6              | 10.7              | 12.6              | 0.69        |
|                                  | (5.99, 22.6)      | (10.6, 20.4)      | (8.37, 16.9)      | (8.58, 21.1)      | (6.96, 16.7)      | (10.6, 17.2)      | (5.24, 20.7)      | (8.44, 18.5)      |             |
|                                  | 9.52              | 8.33              | 8.63              | 9.06              | 8.97              | 8.60              | 8.16              | 8.58              |             |
|                                  | (7.28, 12.4)      | (5.70, 12.0)      | (6.01, 12.2)      | (6.20, 13.05)     | (6.15, 12.9)      | (6.86, 10.74)     | (5.40, 12.15)     | (6.43, 11.38)     |             |
| <b>% Hispanic</b>                |                   |                   |                   |                   |                   |                   |                   |                   |             |
| SNAP participants                | 9.6               | 6.6               | 12.2              | 10.6              | 14.9              | 14.8              | 9.4               | 13.4              | 0.35        |
| Income-eligible nonparticipants  | (2.50, 16.6)      | (2.1, 11.2)       | (3.10, 21.3)      | (5.00, 16.2)      | (6.10, 23.6)      | (6.40, 23.1)      | (2.10, 16.6)      | (8.5, 18.3)       | 0.13        |
|                                  | 10.8              | 13.5              | 13.6              | 20.4              | 18.5              | 18.2              | 14.3              | 18.2              |             |

|                                                                         |                      |                      |                      |                      |                      |                      |                      |                      |        |
|-------------------------------------------------------------------------|----------------------|----------------------|----------------------|----------------------|----------------------|----------------------|----------------------|----------------------|--------|
| nonparticipants                                                         | (6.50, 17.6)         | (9.2, 19.4)          | (6.80, 25.6)         | (15.4, 26.4)         | (11.4, 28.7)         | (11.0, 28.4)         | (8.50, 23.1)         | (12.0, 26.7)         |        |
| Higher-Income<br>Individuals                                            | 5.09<br>(3.42, 7.52) | 6.06<br>(4.53, 8.06) | 6.17<br>(3.66, 10.2) | 5.54<br>(4.22, 7.23) | 5.92<br>(4.68, 7.47) | 5.78<br>(3.50, 9.39) | 6.47<br>(3.79, 10.8) | 6.30<br>(3.89, 10.1) | 0.58   |
| <b>% High school or less than high school education</b>                 |                      |                      |                      |                      |                      |                      |                      |                      |        |
| SNAP<br>participants                                                    | 78.4<br>(71.0, 84.3) | 71.9<br>(63.5, 79.0) | 70.3<br>(62.8, 76.8) | 65.8<br>(58.7, 72.3) | 76.8<br>(72.2, 80.8) | 71.9<br>(67.1, 76.3) | 58<br>(51.9, 63.8)   | 62.3<br>(58.8, 65.7) | <0.001 |
| Income-eligible<br>nonparticipants                                      | 66.3<br>(56.4, 74.9) | 69.6<br>(65.5, 73.4) | 62.6<br>(55.1, 69.4) | 64.6<br>(56.9, 71.6) | 66.7<br>(57.6, 74.6) | 59.5<br>(51.6, 66.9) | 51.5<br>(36.7, 66.0) | 52<br>(43.8, 60.1)   | 0.002  |
| Higher-Income<br>Individuals                                            | 43.7<br>(39.6, 47.9) | 36.3<br>(33.3, 39.4) | 37.9<br>(34.5, 41.5) | 36.6<br>(32.5, 40.9) | 38.3<br>(33.9, 42.8) | 32.7<br>(29.8, 35.6) | 27.7<br>(22.4, 33.7) | 28.1<br>(24.9, 31.5) | <0.001 |
| <b>% Some college, college or above education</b>                       |                      |                      |                      |                      |                      |                      |                      |                      |        |
| SNAP<br>participants                                                    | 21.6<br>(15.7, 29.0) | 28.1<br>(21.0, 36.5) | 29.7<br>(23.2, 37.2) | 34.2<br>(27.7, 41.3) | 23.2<br>(19.2, 27.8) | 28.1<br>(23.7, 32.9) | 42<br>(36.2, 48.1)   | 37.7<br>(34.3, 41.2) | <0.001 |
| Income-eligible<br>nonparticipants                                      | 33.7<br>(25.1, 43.6) | 30.4<br>(26.6, 34.5) | 37.4<br>(30.6, 44.9) | 35.4<br>(28.4, 43.1) | 33.3<br>(25.4, 42.4) | 40.5<br>(33.1, 48.4) | 48.5<br>(34.0, 63.3) | 48<br>(39.9, 56.2)   | 0.002  |
| Higher-Income<br>Individuals                                            | 56.3<br>(52.1, 60.4) | 63.7<br>(60.6, 66.7) | 62.1<br>(58.5, 65.5) | 63.4<br>(59.1, 67.5) | 61.7<br>(57.2, 66.1) | 67.3<br>(64.4, 70.2) | 72.3<br>(66.3, 77.6) | 71.9<br>(68.5, 75.1) | <0.001 |
| <b>Family income to poverty ratio (FIPR)<sup>a</sup>, mean (95% CI)</b> |                      |                      |                      |                      |                      |                      |                      |                      |        |
| SNAP<br>participants                                                    | 1.07<br>(0.86, 1.29) | 1.11<br>(0.92, 1.30) | 1.06<br>(0.94, 1.18) | 1.46<br>(1.22, 1.68) | 0.96<br>(0.86, 1.06) | 1.12<br>(0.86, 1.38) | 1.25<br>(1.13, 1.37) | 1.21<br>(1.11, 1.32) | 0.11   |
| Income-eligible<br>nonparticipants                                      | 0.83<br>(0.77, 0.90) | 0.81<br>(0.78, 0.85) | 0.90<br>(0.84, 0.96) | 0.86<br>(0.83, 0.90) | 0.85<br>(0.80, 0.89) | 0.81<br>(0.78, 0.85) | 0.80<br>(0.69, 0.92) | 0.92<br>(0.88, 0.97) | 0.46   |
| Higher-Income<br>Individuals                                            | 3.59<br>(3.42, 3.76) | 3.66<br>(3.56, 3.76) | 3.60<br>(3.50, 3.70) | 3.60<br>(3.50, 3.70) | 3.66<br>(3.52, 3.79) | 3.69<br>(3.60, 3.77) | 3.71<br>(3.56, 3.86) | 3.69<br>(3.57, 3.81) | 0.16   |
| <b>% Lower-income (FIPR &lt;1.30)</b>                                   |                      |                      |                      |                      |                      |                      |                      |                      |        |
| SNAP<br>participants                                                    | 74.7<br>(60.8, 88.5) | 75.5<br>(64.6, 86.3) | 73.2<br>(64.5, 82.0) | 62.6<br>(52.3, 72.9) | 79.8<br>(73.7, 85.9) | 73.0<br>(64.1, 81.8) | 64.7<br>(57.0, 72.3) | 69.2<br>(63.7, 74.7) | 0.16   |
| Income-eligible<br>nonparticipants                                      | 1                    | 1                    | 1                    | 1                    | 1                    | 1                    | 1                    | 1                    |        |
| Higher-Income<br>Individuals                                            | 0                    | 0                    | 0                    | 0                    | 0                    | 0                    | 0                    | 0                    |        |
| <b>% Higher-income (FIPR ≥1.30)</b>                                     |                      |                      |                      |                      |                      |                      |                      |                      |        |
| SNAP<br>participants                                                    | 25.3<br>(14.0, 41.3) | 24.5<br>(15.3, 36.9) | 26.8<br>(19.0, 36.4) | 37.4<br>(27.8, 48.1) | 20.2<br>(14.8, 26.9) | 27<br>(19.1, 36.7)   | 35.3<br>(28.1, 43.3) | 30.8<br>(25.6, 36.5) | 0.16   |
| Income-eligible<br>nonparticipants                                      | 0                    | 0                    | 0                    | 0                    | 0                    | 0                    | 0                    | 0                    |        |
| Higher-Income<br>Individuals                                            | 1                    | 1                    | 1                    | 1                    | 1                    | 1                    | 1                    | 1                    |        |

Abbreviations: SNAP: Supplemental Nutrition Assistance Program; FIPR: Family income to poverty ratio

<sup>a</sup>. Family income to poverty ratio represents the ratio of family income to the federal poverty threshold, adjusting for household size. For reference, the federal threshold in 2014 for a family of 4 was \$23,850/y. A family of 4 earning \$44,123/y would have a ratio of 1.85. A lower ratio indicates a lower level of income.

**eTable 2.** Trends in Dietary Intake of Key Food Groups and Nutrients Among U.S. Adults by SNAP Participation Status, 1999-2014

| Dietary Intake                           | Survey-Weighted Mean Intake (95% CI) <sup>a</sup> |                      |                      |                      |                      |                       |                       |                       | P for Trend                 | Mean Change From 1999-2000 To 2013-2014 (95% CI) |
|------------------------------------------|---------------------------------------------------|----------------------|----------------------|----------------------|----------------------|-----------------------|-----------------------|-----------------------|-----------------------------|--------------------------------------------------|
|                                          | 1999-2000<br>(n=423)                              | 2001-2002<br>(n=417) | 2003-2004<br>(n=573) | 2005-2006<br>(n=490) | 2007-2008<br>(n=858) | 2009-2010<br>(n=1158) | 2011-2012<br>(n=1135) | 2013-2014<br>(n=1108) |                             |                                                  |
| <b>Total fruits, servings/d</b>          |                                                   |                      |                      |                      |                      |                       |                       |                       |                             |                                                  |
| SNAP participants                        | 0.75<br>(0.59, 0.91)                              | 0.79<br>(0.63, 0.95) | 0.84<br>(0.68, 1.00) | 0.83<br>(0.67, 1.00) | 0.76<br>(0.63, 0.90) | 0.91<br>(0.81, 1.01)  | 0.90<br>(0.80, 0.99)  | 0.73<br>(0.64, 0.82)  | 0.79                        | -0.02<br>(-0.20, 0.16)                           |
| Income-eligible nonparticipants          | 1.00<br>(0.78, 1.22)                              | 0.87<br>(0.70, 1.04) | 0.93<br>(0.78, 1.08) | 1.01<br>(0.95, 1.06) | 0.93<br>(0.81, 1.04) | 1.01<br>(0.91, 1.11)  | 1.03<br>(0.93, 1.13)  | 0.88<br>(0.75, 1.01)  | 0.91                        | -0.12<br>(-0.37, 0.14)                           |
| Higher-Income Individuals                | 1.02<br>(0.88, 1.15)                              | 1.13<br>(1.04, 1.22) | 1.03<br>(0.91, 1.15) | 1.00<br>(0.93, 1.08) | 1.05<br>(0.95, 1.15) | 1.12<br>(1.08, 1.17)  | 1.09<br>(1.00, 1.17)  | 0.99<br>(0.92, 1.05)  | 0.85<br>0.91 <sup>b</sup>   | -0.03<br>(-0.18, 0.12)<br>0.71 <sup>b</sup>      |
| <b>Whole fruits, servings/d</b>          |                                                   |                      |                      |                      |                      |                       |                       |                       |                             |                                                  |
| SNAP participants                        | 0.35<br>(0.23, 0.47)                              | 0.38<br>(0.31, 0.44) | 0.40<br>(0.33, 0.48) | 0.39<br>(0.28, 0.49) | 0.46<br>(0.36, 0.55) | 0.51<br>(0.45, 0.58)  | 0.53<br>(0.45, 0.62)  | 0.47<br>(0.38, 0.56)  | 0.002                       | 0.12<br>(-0.02, 0.27)                            |
| Income-eligible nonparticipants          | 0.57<br>(0.43, 0.70)                              | 0.54<br>(0.41, 0.67) | 0.57<br>(0.46, 0.68) | 0.64<br>(0.60, 0.69) | 0.59<br>(0.50, 0.67) | 0.64<br>(0.56, 0.72)  | 0.66<br>(0.58, 0.74)  | 0.60<br>(0.50, 0.70)  | 0.16                        | 0.04<br>(-0.12, 0.2)                             |
| Higher-Income Individuals                | 0.62<br>(0.54, 0.71)                              | 0.67<br>(0.63, 0.72) | 0.66<br>(0.58, 0.73) | 0.66<br>(0.60, 0.72) | 0.75<br>(0.68, 0.82) | 0.83<br>(0.80, 0.86)  | 0.81<br>(0.74, 0.89)  | 0.77<br>(0.71, 0.83)  | <0.001<br>0.22 <sup>b</sup> | 0.15<br>(0.04, 0.25)<br>0.47 <sup>b</sup>        |
| <b>100% fruit juices, servings/d</b>     |                                                   |                      |                      |                      |                      |                       |                       |                       |                             |                                                  |
| SNAP participants                        | 0.41<br>(0.33, 0.49)                              | 0.50<br>(0.36, 0.65) | 0.46<br>(0.37, 0.55) | 0.68<br>(0.21, 1.14) | 0.36<br>(0.26, 0.46) | 0.41<br>(0.37, 0.45)  | 0.42<br>(0.34, 0.50)  | 0.28<br>(0.23, 0.32)  | 0.002                       | -0.13<br>(-0.23, -0.04)                          |
| Income-eligible nonparticipants          | 0.51<br>(0.35, 0.66)                              | 0.38<br>(0.29, 0.46) | 0.38<br>(0.31, 0.46) | 0.36<br>(0.33, 0.40) | 0.39<br>(0.32, 0.46) | 0.42<br>(0.35, 0.48)  | 0.38<br>(0.27, 0.49)  | 0.32<br>(0.25, 0.39)  | 0.08                        | -0.19<br>(-0.36, -0.02)                          |
| Higher-Income Individuals                | 0.42<br>(0.35, 0.49)                              | 0.43<br>(0.38, 0.47) | 0.38<br>(0.33, 0.44) | 0.36<br>(0.32, 0.39) | 0.32<br>(0.28, 0.36) | 0.32<br>(0.28, 0.35)  | 0.27<br>(0.23, 0.32)  | 0.23<br>(0.21, 0.25)  | <0.001<br>0.30 <sup>b</sup> | -0.19<br>(-0.26, -0.12)<br>0.46 <sup>b</sup>     |
| <b>Total vegetables, servings/d</b>      |                                                   |                      |                      |                      |                      |                       |                       |                       |                             |                                                  |
| SNAP participants                        | 1.37<br>(1.11, 1.63)                              | 1.29<br>(1.15, 1.43) | 1.34<br>(1.21, 1.48) | 1.33<br>(1.18, 1.49) | 1.34<br>(1.21, 1.47) | 1.24<br>(1.18, 1.30)  | 1.32<br>(1.24, 1.41)  | 1.13<br>(1.02, 1.25)  | 0.05                        | -0.23<br>(-0.51, 0.05)                           |
| Income-eligible nonparticipants          | 1.41<br>(1.27, 1.54)                              | 1.46<br>(1.30, 1.63) | 1.53<br>(1.45, 1.61) | 1.53<br>(1.37, 1.69) | 1.46<br>(1.35, 1.57) | 1.47<br>(1.38, 1.55)  | 1.52<br>(1.45, 1.59)  | 1.33<br>(1.21, 1.44)  | 0.55                        | -0.08<br>(-0.26, 0.1)                            |
| Higher-Income Individuals                | 1.68<br>(1.60, 1.76)                              | 1.64<br>(1.57, 1.71) | 1.68<br>(1.64, 1.72) | 1.68<br>(1.60, 1.75) | 1.67<br>(1.61, 1.73) | 1.71<br>(1.64, 1.77)  | 1.73<br>(1.64, 1.81)  | 1.59<br>(1.53, 1.65)  | 0.80<br>0.22 <sup>b</sup>   | -0.09<br>(-0.19, 0.01)<br>0.63 <sup>b</sup>      |
| <b>Dark-green vegetables, servings/d</b> |                                                   |                      |                      |                      |                      |                       |                       |                       |                             |                                                  |
| SNAP participants                        | 0.06<br>(0.03, 0.08)                              | 0.05<br>(0.03, 0.08) | 0.05<br>(0.03, 0.07) | 0.11<br>(0.05, 0.17) | 0.07<br>(0.06, 0.09) | 0.09<br>(0.07, 0.10)  | 0.09<br>(0.06, 0.12)  | 0.10<br>(0.06, 0.13)  | 0.006                       | 0.04<br>(0.00, 0.08)                             |
| Income-eligible nonparticipants          | 0.05<br>(0.03, 0.07)                              | 0.07<br>(0.05, 0.10) | 0.09<br>(0.06, 0.11) | 0.10<br>(0.07, 0.13) | 0.09<br>(0.06, 0.12) | 0.10<br>(0.06, 0.13)  | 0.12<br>(0.08, 0.16)  | 0.12<br>(0.09, 0.14)  | <0.001                      | 0.06<br>(0.03, 0.09)                             |
| Higher-Income Individuals                | 0.14<br>(0.10, 0.17)                              | 0.13<br>(0.11, 0.16) | 0.13<br>(0.11, 0.14) | 0.15<br>(0.13, 0.17) | 0.15<br>(0.13, 0.17) | 0.16<br>(0.15, 0.17)  | 0.18<br>(0.15, 0.22)  | 0.19<br>(0.17, 0.21)  | <0.001<br>0.62 <sup>b</sup> | 0.06<br>(0.01, 0.10)<br>0.57 <sup>b</sup>        |
| <b>Tomatoes, servings/d</b>              |                                                   |                      |                      |                      |                      |                       |                       |                       |                             |                                                  |

|                                                           |                      |                      |                      |                      |                      |                      |                      |                      |                             |                                              |
|-----------------------------------------------------------|----------------------|----------------------|----------------------|----------------------|----------------------|----------------------|----------------------|----------------------|-----------------------------|----------------------------------------------|
| SNAP participants                                         | 0.23<br>(0.17, 0.28) | 0.32<br>(0.25, 0.38) | 0.31<br>(0.26, 0.37) | 0.26<br>(0.22, 0.29) | 0.27<br>(0.24, 0.30) | 0.25<br>(0.23, 0.28) | 0.27<br>(0.24, 0.30) | 0.21<br>(0.19, 0.23) | 0.02                        | -0.02<br>(-0.07, 0.04)                       |
| Income-eligible nonparticipants                           | 0.26<br>(0.21, 0.32) | 0.33<br>(0.27, 0.40) | 0.35<br>(0.29, 0.42) | 0.32<br>(0.28, 0.36) | 0.28<br>(0.26, 0.30) | 0.28<br>(0.25, 0.31) | 0.31<br>(0.29, 0.33) | 0.27<br>(0.23, 0.30) | 0.27                        | 0.00<br>(-0.06, 0.06)                        |
| Higher-Income Individuals                                 | 0.31<br>(0.28, 0.34) | 0.34<br>(0.31, 0.38) | 0.36<br>(0.33, 0.40) | 0.32<br>(0.30, 0.35) | 0.32<br>(0.31, 0.34) | 0.31<br>(0.27, 0.34) | 0.31<br>(0.29, 0.33) | 0.28<br>(0.26, 0.29) | <0.001<br>0.67 <sup>b</sup> | -0.04<br>(-0.07, 0.00)<br>0.43 <sup>b</sup>  |
| <b>Other red/orange vegetables, servings/d</b>            |                      |                      |                      |                      |                      |                      |                      |                      |                             |                                              |
| SNAP participants                                         | 0.08<br>(0.04, 0.11) | 0.06<br>(0.04, 0.08) | 0.05<br>(0.03, 0.06) | 0.06<br>(0.04, 0.08) | 0.05<br>(0.04, 0.06) | 0.06<br>(0.05, 0.07) | 0.07<br>(0.05, 0.09) | 0.07<br>(0.05, 0.09) | 0.35                        | -0.01<br>(-0.05, 0.04)                       |
| Income-eligible nonparticipants                           | 0.08<br>(0.05, 0.10) | 0.08<br>(0.06, 0.09) | 0.09<br>(0.06, 0.11) | 0.08<br>(0.06, 0.10) | 0.09<br>(0.06, 0.12) | 0.09<br>(0.08, 0.10) | 0.09<br>(0.07, 0.12) | 0.08<br>(0.06, 0.10) | 0.33                        | 0.00<br>(-0.03, 0.04)                        |
| Higher-Income Individuals                                 | 0.09<br>(0.08, 0.11) | 0.09<br>(0.07, 0.10) | 0.08<br>(0.07, 0.08) | 0.09<br>(0.08, 0.10) | 0.09<br>(0.08, 0.10) | 0.11<br>(0.10, 0.12) | 0.12<br>(0.11, 0.13) | 0.11<br>(0.10, 0.13) | <0.001<br>0.10 <sup>b</sup> | 0.02<br>(0.00, 0.04)<br>0.37 <sup>b</sup>    |
| <b>White potatoes, servings/d</b>                         |                      |                      |                      |                      |                      |                      |                      |                      |                             |                                              |
| SNAP participants                                         | 0.45<br>(0.36, 0.54) | 0.33<br>(0.25, 0.41) | 0.44<br>(0.38, 0.50) | 0.37<br>(0.28, 0.45) | 0.38<br>(0.33, 0.42) | 0.33<br>(0.30, 0.36) | 0.32<br>(0.28, 0.36) | 0.30<br>(0.26, 0.33) | <0.001                      | -0.15<br>(-0.24, -0.06)                      |
| Income-eligible nonparticipants                           | 0.38<br>(0.29, 0.46) | 0.36<br>(0.28, 0.44) | 0.40<br>(0.35, 0.45) | 0.35<br>(0.29, 0.41) | 0.35<br>(0.29, 0.42) | 0.33<br>(0.28, 0.39) | 0.35<br>(0.29, 0.40) | 0.30<br>(0.26, 0.34) | 0.06                        | -0.08<br>(-0.17, 0.01)                       |
| Higher-Income Individuals                                 | 0.38<br>(0.34, 0.43) | 0.37<br>(0.35, 0.39) | 0.37<br>(0.34, 0.41) | 0.35<br>(0.32, 0.39) | 0.37<br>(0.33, 0.40) | 0.36<br>(0.34, 0.38) | 0.32<br>(0.29, 0.34) | 0.32<br>(0.29, 0.34) | <0.001<br>0.14 <sup>b</sup> | -0.07<br>(-0.12, -0.01)<br>0.21 <sup>b</sup> |
| <b>Other starchy vegetables, servings/d</b>               |                      |                      |                      |                      |                      |                      |                      |                      |                             |                                              |
| SNAP participants                                         | 0.09<br>(0.05, 0.14) | 0.09<br>(0.05, 0.13) | 0.07<br>(0.05, 0.10) | 0.08<br>(0.05, 0.10) | 0.09<br>(0.07, 0.10) | 0.09<br>(0.07, 0.11) | 0.10<br>(0.06, 0.13) | 0.06<br>(0.05, 0.08) | 0.49                        | -0.03<br>(-0.07, 0.01)                       |
| Income-eligible nonparticipants                           | 0.10<br>(0.06, 0.14) | 0.10<br>(0.08, 0.13) | 0.07<br>(0.05, 0.09) | 0.09<br>(0.07, 0.11) | 0.09<br>(0.07, 0.11) | 0.10<br>(0.07, 0.13) | 0.09<br>(0.06, 0.11) | 0.06<br>(0.04, 0.08) | 0.16                        | -0.04<br>(-0.08, 0.01)                       |
| Higher-Income Individuals                                 | 0.10<br>(0.08, 0.11) | 0.09<br>(0.08, 0.10) | 0.08<br>(0.07, 0.09) | 0.10<br>(0.08, 0.11) | 0.09<br>(0.08, 0.11) | 0.09<br>(0.07, 0.10) | 0.08<br>(0.07, 0.09) | 0.07<br>(0.06, 0.08) | 0.003<br>0.90 <sup>b</sup>  | -0.03<br>(-0.04, -0.01)<br>0.88 <sup>b</sup> |
| <b>Vegetables, excluding potatoes/starchy, servings/d</b> |                      |                      |                      |                      |                      |                      |                      |                      |                             |                                              |
| SNAP participants                                         | 0.82<br>(0.63, 1.02) | 0.87<br>(0.75, 1.00) | 0.83<br>(0.73, 0.93) | 0.89<br>(0.75, 1.03) | 0.88<br>(0.77, 0.98) | 0.82<br>(0.75, 0.89) | 0.91<br>(0.83, 0.99) | 0.77<br>(0.68, 0.87) | 0.66                        | -0.05<br>(-0.27, 0.17)                       |
| Income-eligible nonparticipants                           | 0.93<br>(0.83, 1.03) | 1.00<br>(0.85, 1.15) | 1.06<br>(0.95, 1.16) | 1.09<br>(0.96, 1.21) | 1.02<br>(0.92, 1.12) | 1.03<br>(0.96, 1.11) | 1.08<br>(0.97, 1.20) | 0.97<br>(0.87, 1.06) | 0.42                        | 0.04<br>(-0.10, 0.18)                        |
| Higher-Income Individuals                                 | 1.20<br>(1.10, 1.29) | 1.18<br>(1.11, 1.24) | 1.22<br>(1.17, 1.27) | 1.23<br>(1.15, 1.30) | 1.21<br>(1.15, 1.28) | 1.26<br>(1.20, 1.32) | 1.33<br>(1.23, 1.42) | 1.20<br>(1.13, 1.27) | 0.10<br>0.40 <sup>b</sup>   | 0.00<br>(-0.11, 0.12)<br>0.83 <sup>b</sup>   |
| <b>Total grains, servings/d</b>                           |                      |                      |                      |                      |                      |                      |                      |                      |                             |                                              |
| SNAP participants                                         | 5.59<br>(5.15, 6.04) | 6.34<br>(5.72, 6.96) | 6.15<br>(5.88, 6.41) | 5.97<br>(5.61, 6.32) | 6.20<br>(5.89, 6.50) | 6.32<br>(6.10, 6.54) | 6.36<br>(6.03, 6.68) | 5.58<br>(5.32, 5.83) | 0.73                        | -0.02<br>(-0.52, 0.49)                       |
| Income-eligible nonparticipants                           | 6.28<br>(5.91, 6.65) | 6.75<br>(6.40, 7.10) | 6.61<br>(6.31, 6.90) | 6.39<br>(6.04, 6.74) | 6.37<br>(6.06, 6.67) | 6.63<br>(6.39, 6.88) | 6.80<br>(6.41, 7.19) | 6.13<br>(5.86, 6.40) | 0.77                        | -0.15<br>(-0.60, 0.31)                       |
| Higher-Income Individuals                                 | 6.06<br>(5.86, 6.27) | 6.39<br>(6.21, 6.58) | 6.27<br>(6.09, 6.44) | 6.20<br>(6.06, 6.33) | 6.15<br>(6.04, 6.25) | 6.19<br>(6.03, 6.35) | 6.23<br>(6.08, 6.37) | 5.96<br>(5.82, 6.10) | 0.09                        | -0.10<br>(-0.35, 0.14)                       |
| <b>Whole grains, servings/d</b>                           |                      |                      |                      |                      |                      |                      |                      |                      |                             |                                              |
| SNAP participants                                         | 0.41<br>(0.27, 0.55) | 0.42<br>(0.29, 0.56) | 0.46<br>(0.35, 0.57) | 0.46<br>(0.34, 0.59) | 0.47<br>(0.41, 0.54) | 0.64<br>(0.55, 0.73) | 0.78<br>(0.68, 0.89) | 0.66<br>(0.59, 0.73) | <0.001                      | 0.25<br>(0.10, 0.40)                         |

|                                          |                      |                      |                      |                      |                      |                      |                      |                      |        |                         |
|------------------------------------------|----------------------|----------------------|----------------------|----------------------|----------------------|----------------------|----------------------|----------------------|--------|-------------------------|
| Income-eligible nonparticipants          | 0.42<br>(0.33, 0.51) | 0.56<br>(0.42, 0.70) | 0.59<br>(0.47, 0.71) | 0.69<br>(0.57, 0.80) | 0.67<br>(0.53, 0.81) | 0.79<br>(0.68, 0.90) | 0.87<br>(0.76, 0.98) | 0.78<br>(0.65, 0.92) | <0.001 | 0.37<br>(0.20, 0.53)    |
| Higher-Income Individuals                | 0.61<br>(0.54, 0.68) | 0.77<br>(0.69, 0.84) | 0.70<br>(0.65, 0.75) | 0.81<br>(0.74, 0.87) | 0.80<br>(0.72, 0.88) | 0.96<br>(0.91, 1.01) | 1.08<br>(0.99, 1.16) | 1.00<br>(0.96, 1.04) | <0.001 | 0.39<br>(0.31, 0.47)    |
| <b>Refined grains, servings/d</b>        |                      |                      |                      |                      |                      |                      |                      |                      |        |                         |
| SNAP participants                        | 5.18<br>(4.67, 5.70) | 5.92<br>(5.28, 6.56) | 5.69<br>(5.41, 5.96) | 5.50<br>(5.15, 5.85) | 5.72<br>(5.42, 6.03) | 5.68<br>(5.48, 5.88) | 5.57<br>(5.27, 5.87) | 4.92<br>(4.67, 5.17) | 0.05   | -0.27<br>(-0.83, 0.30)  |
| Income-eligible nonparticipants          | 5.86<br>(5.51, 6.21) | 6.19<br>(5.85, 6.52) | 6.02<br>(5.69, 6.35) | 5.7<br>(5.40, 6.01)  | 5.69<br>(5.40, 5.99) | 5.84<br>(5.58, 6.1)  | 5.93<br>(5.61, 6.26) | 5.34<br>(5.08, 5.61) | 0.01   | -0.52<br>(-0.95, -0.08) |
| Higher-Income Individuals                | 5.45<br>(5.26, 5.64) | 5.62<br>(5.45, 5.8)  | 5.57<br>(5.41, 5.72) | 5.39<br>(5.25, 5.54) | 5.34<br>(5.25, 5.44) | 5.23<br>(5.07, 5.39) | 5.15<br>(5.01, 5.28) | 4.96<br>(4.83, 5.1)  | <0.001 | -0.49<br>(-0.72, -0.26) |
| <b>Nuts and seeds, servings/d</b>        |                      |                      |                      |                      |                      |                      |                      |                      |        |                         |
| SNAP participants                        | 0.21<br>(0.11, 0.31) | 0.29<br>(0.01, 0.59) | 0.33<br>(0.24, 0.41) | 0.36<br>(0.26, 0.47) | 0.32<br>(0.21, 0.42) | 0.34<br>(0.28, 0.40) | 0.37<br>(0.28, 0.47) | 0.35<br>(0.24, 0.47) | 0.17   | 0.15<br>(0.001, 0.29)   |
| Income-eligible nonparticipants          | 0.42<br>(0.28, 0.56) | 0.43<br>(0.19, 0.68) | 0.52<br>(0.37, 0.67) | 0.44<br>(0.32, 0.56) | 0.42<br>(0.26, 0.59) | 0.42<br>(0.34, 0.50) | 0.42<br>(0.31, 0.52) | 0.46<br>(0.36, 0.56) | 0.92   | 0.04<br>(-0.13, 0.21)   |
| Higher-Income Individuals                | 0.46<br>(0.4, 0.53)  | 0.51<br>(0.43, 0.58) | 0.57<br>(0.50, 0.64) | 0.63<br>(0.57, 0.68) | 0.60<br>(0.53, 0.66) | 0.69<br>(0.63, 0.75) | 0.82<br>(0.74, 0.9)  | 0.82<br>(0.75, 0.88) | <0.001 | 0.36<br>(0.27, 0.44)    |
| <b>Legumes, servings/d</b>               |                      |                      |                      |                      |                      |                      |                      |                      |        |                         |
| SNAP participants                        | 0.17<br>(0.05, 0.29) | 0.16<br>(0.08, 0.23) | 0.12<br>(0.09, 0.15) | 0.09<br>(0.06, 0.12) | 0.11<br>(0.08, 0.14) | 0.13<br>(0.10, 0.17) | 0.13<br>(0.09, 0.16) | 0.11<br>(0.09, 0.12) | 0.32   | -0.06<br>(-0.18, 0.06)  |
| Income-eligible nonparticipants          | 0.13<br>(0.08, 0.17) | 0.14<br>(0.1, 0.18)  | 0.12<br>(0.10, 0.14) | 0.13<br>(0.10, 0.16) | 0.15<br>(0.11, 0.19) | 0.14<br>(0.11, 0.18) | 0.16<br>(0.11, 0.21) | 0.14<br>(0.13, 0.16) | 0.18   | 0.02<br>(-0.02, 0.06)   |
| Higher-Income Individuals                | 0.10<br>(0.08, 0.12) | 0.10<br>(0.08, 0.11) | 0.09<br>(0.07, 0.10) | 0.09<br>(0.08, 0.11) | 0.10<br>(0.09, 0.11) | 0.10<br>(0.09, 0.11) | 0.11<br>(0.10, 0.12) | 0.09<br>(0.09, 0.10) | 0.49   | -0.01<br>(-0.03, 0.01)  |
| <b>Total meat, serving/d</b>             |                      |                      |                      |                      |                      |                      |                      |                      |        |                         |
| SNAP participants                        | 1.21<br>(1.03, 1.38) | 1.14<br>(1.02, 1.27) | 1.12<br>(1.01, 1.22) | 1.25<br>(1.15, 1.35) | 1.22<br>(1.14, 1.3)  | 1.22<br>(1.15, 1.28) | 1.15<br>(1.08, 1.22) | 1.13<br>(1.07, 1.2)  | 0.56   | -0.08<br>(-0.26, 0.11)  |
| Income-eligible nonparticipants          | 1.02<br>(0.9, 1.14)  | 1.11<br>(1.02, 1.21) | 1.03<br>(0.93, 1.14) | 1.21<br>(1.13, 1.30) | 1.08<br>(1.00, 1.16) | 1.20<br>(1.12, 1.28) | 1.18<br>(1.09, 1.28) | 1.08<br>(0.99, 1.16) | 0.11   | 0.05<br>(-0.09, 0.20)   |
| Higher-Income Individuals                | 1.15<br>(1.09, 1.21) | 1.10<br>(1.07, 1.13) | 1.18<br>(1.14, 1.22) | 1.19<br>(1.15, 1.23) | 1.19<br>(1.16, 1.22) | 1.19<br>(1.13, 1.25) | 1.13<br>(1.08, 1.18) | 1.11<br>(1.08, 1.14) | 0.70   | -0.04<br>(-0.11, 0.03)  |
| <b>Processed meats, servings/d</b>       |                      |                      |                      |                      |                      |                      |                      |                      |        |                         |
| SNAP participants                        | 0.29<br>(0.22, 0.36) | 0.23<br>(0.18, 0.27) | 0.27<br>(0.22, 0.31) | 0.31<br>(0.25, 0.37) | 0.30<br>(0.25, 0.36) | 0.32<br>(0.27, 0.37) | 0.29<br>(0.25, 0.33) | 0.31<br>(0.24, 0.38) | 0.18   | 0.02<br>(-0.08, 0.12)   |
| Income-eligible nonparticipants          | 0.20<br>(0.15, 0.25) | 0.26<br>(0.22, 0.31) | 0.26<br>(0.22, 0.30) | 0.25<br>(0.21, 0.29) | 0.26<br>(0.23, 0.30) | 0.28<br>(0.24, 0.32) | 0.26<br>(0.24, 0.29) | 0.26<br>(0.23, 0.29) | 0.09   | 0.06<br>(0.00, 0.12)    |
| Higher-Income Individuals                | 0.29<br>(0.25, 0.33) | 0.30<br>(0.28, 0.33) | 0.30<br>(0.27, 0.33) | 0.30<br>(0.27, 0.33) | 0.29<br>(0.26, 0.31) | 0.30<br>(0.28, 0.32) | 0.29<br>(0.27, 0.31) | 0.26<br>(0.24, 0.29) | 0.11   | -0.03<br>(-0.08, 0.02)  |
| <b>Unprocessed red meats, servings/d</b> |                      |                      |                      |                      |                      |                      |                      |                      |        |                         |
| SNAP participants                        | 0.53<br>(0.47, 0.59) | 0.53<br>(0.40, 0.66) | 0.46<br>(0.40, 0.53) | 0.55<br>(0.46, 0.65) | 0.52<br>(0.48, 0.56) | 0.49<br>(0.46, 0.51) | 0.45<br>(0.40, 0.50) | 0.40<br>(0.37, 0.44) | 0.001  | -0.13<br>(-0.20, -0.06) |
| Income-eligible                          | 0.48                 | 0.48                 | 0.42                 | 0.53                 | 0.40                 | 0.46                 | 0.49                 | 0.39                 | 0.19   | -0.09                   |

|                                       |                      |                      |                      |                      |                      |                      |                      |                      |                             |                            |
|---------------------------------------|----------------------|----------------------|----------------------|----------------------|----------------------|----------------------|----------------------|----------------------|-----------------------------|----------------------------|
| nonparticipants                       | (0.39, 0.56)         | (0.40, 0.56)         | (0.38, 0.47)         | (0.48, 0.58)         | (0.35, 0.45)         | (0.41, 0.5)          | (0.40, 0.58)         | (0.36, 0.42)         |                             | (-0.17, 0.00)              |
| Higher-Income Individuals             | 0.48<br>(0.44, 0.53) | 0.44<br>(0.41, 0.47) | 0.48<br>(0.45, 0.51) | 0.47<br>(0.44, 0.5)  | 0.46<br>(0.43, 0.48) | 0.45<br>(0.41, 0.49) | 0.44<br>(0.40, 0.48) | 0.42<br>(0.40, 0.44) | 0.03<br>0.23 <sup>b</sup>   | -0.06<br>0.51 <sup>b</sup> |
| <b>Poultry, servings/d</b>            |                      |                      |                      |                      |                      |                      |                      |                      |                             |                            |
| SNAP participants                     | 0.39<br>(0.25, 0.53) | 0.39<br>(0.28, 0.50) | 0.39<br>(0.32, 0.46) | 0.39<br>(0.33, 0.46) | 0.40<br>(0.33, 0.47) | 0.41<br>(0.36, 0.46) | 0.41<br>(0.35, 0.46) | 0.42<br>(0.38, 0.47) | 0.45                        | 0.03<br>(-0.11, 0.18)      |
| Income-eligible nonparticipants       | 0.35<br>(0.27, 0.43) | 0.37<br>(0.32, 0.41) | 0.35<br>(0.28, 0.42) | 0.43<br>(0.36, 0.51) | 0.42<br>(0.36, 0.47) | 0.46<br>(0.40, 0.53) | 0.43<br>(0.39, 0.47) | 0.43<br>(0.36, 0.50) | 0.009                       | 0.08<br>(-0.02, 0.19)      |
| Higher-Income Individuals             | 0.38<br>(0.34, 0.42) | 0.36<br>(0.33, 0.39) | 0.40<br>(0.36, 0.44) | 0.41<br>(0.38, 0.44) | 0.45<br>(0.41, 0.49) | 0.44<br>(0.39, 0.49) | 0.40<br>(0.36, 0.44) | 0.43<br>(0.40, 0.46) | 0.004<br>0.48 <sup>b</sup>  | 0.05<br>0.83 <sup>b</sup>  |
| <b>Fish and shellfish, servings/d</b> |                      |                      |                      |                      |                      |                      |                      |                      |                             |                            |
| SNAP participants                     | 0.14<br>(0.06, 0.23) | 0.09<br>(0.04, 0.14) | 0.13<br>(0.09, 0.16) | 0.11<br>(0.08, 0.15) | 0.14<br>(0.10, 0.17) | 0.16<br>(0.13, 0.19) | 0.19<br>(0.15, 0.23) | 0.16<br>(0.11, 0.22) | 0.03                        | 0.02<br>(-0.08, 0.12)      |
| Income-eligible nonparticipants       | 0.18<br>(0.12, 0.24) | 0.12<br>(0.09, 0.14) | 0.14<br>(0.1, 0.17)  | 0.15<br>(0.12, 0.17) | 0.16<br>(0.12, 0.19) | 0.18<br>(0.14, 0.22) | 0.16<br>(0.12, 0.2)  | 0.14<br>(0.11, 0.16) | 0.88                        | -0.04<br>(-0.11, 0.02)     |
| Higher-Income Individuals             | 0.16<br>(0.13, 0.18) | 0.16<br>(0.13, 0.19) | 0.17<br>(0.14, 0.2)  | 0.20<br>(0.16, 0.23) | 0.17<br>(0.15, 0.19) | 0.20<br>(0.17, 0.22) | 0.19<br>(0.16, 0.22) | 0.20<br>(0.16, 0.24) | 0.02<br>0.28 <sup>b</sup>   | 0.04<br>0.08 <sup>b</sup>  |
| <b>Eggs, servings/d</b>               |                      |                      |                      |                      |                      |                      |                      |                      |                             |                            |
| SNAP participants                     | 0.59<br>(0.42, 0.75) | 0.37<br>(0.27, 0.48) | 0.48<br>(0.4, 0.56)  | 0.45<br>(0.36, 0.54) | 0.55<br>(0.49, 0.61) | 0.53<br>(0.43, 0.62) | 0.49<br>(0.42, 0.57) | 0.47<br>(0.42, 0.52) | 0.87                        | -0.12<br>(-0.29, 0.05)     |
| Income-eligible nonparticipants       | 0.44<br>(0.39, 0.50) | 0.46<br>(0.39, 0.53) | 0.51<br>(0.42, 0.6)  | 0.53<br>(0.46, 0.61) | 0.49<br>(0.45, 0.54) | 0.52<br>(0.44, 0.61) | 0.47<br>(0.39, 0.55) | 0.50<br>(0.43, 0.58) | 0.34                        | 0.06<br>(-0.03, 0.15)      |
| Higher-Income Individuals             | 0.42<br>(0.38, 0.46) | 0.43<br>(0.40, 0.46) | 0.46<br>(0.42, 0.51) | 0.49<br>(0.46, 0.52) | 0.50<br>(0.47, 0.54) | 0.49<br>(0.45, 0.52) | 0.52<br>(0.49, 0.55) | 0.54<br>(0.5, 0.57)  | <0.001<br>0.04 <sup>b</sup> | 0.12<br>0.06 <sup>b</sup>  |
| <b>Total dairy, servings/d</b>        |                      |                      |                      |                      |                      |                      |                      |                      |                             |                            |
| SNAP participants                     | 1.27<br>(1.04, 1.50) | 1.14<br>(0.97, 1.3)  | 1.39<br>(1.22, 1.56) | 1.42<br>(1.22, 1.63) | 1.24<br>(1.16, 1.32) | 1.51<br>(1.40, 1.62) | 1.53<br>(1.4, 1.65)  | 1.39<br>(1.3, 1.48)  | 0.008                       | 0.12<br>(-0.13, 0.36)      |
| Income-eligible nonparticipants       | 1.31<br>(1.21, 1.40) | 1.33<br>(1.16, 1.49) | 1.34<br>(1.25, 1.43) | 1.46<br>(1.31, 1.60) | 1.45<br>(1.28, 1.62) | 1.50<br>(1.44, 1.57) | 1.50<br>(1.33, 1.67) | 1.39<br>(1.27, 1.50) | 0.03                        | 0.08<br>(-0.07, 0.23)      |
| Higher-Income Individuals             | 1.53<br>(1.44, 1.61) | 1.50<br>(1.44, 1.56) | 1.46<br>(1.37, 1.55) | 1.52<br>(1.45, 1.60) | 1.51<br>(1.42, 1.6)  | 1.62<br>(1.57, 1.67) | 1.47<br>(1.42, 1.52) | 1.46<br>(1.4, 1.51)  | 0.72<br>0.005 <sup>b</sup>  | -0.07<br>0.18 <sup>b</sup> |
| <b>Milk, servings/d</b>               |                      |                      |                      |                      |                      |                      |                      |                      |                             |                            |
| SNAP participants                     | 0.84<br>(0.69, 0.99) | 0.64<br>(0.50, 0.77) | 0.85<br>(0.70, 1.00) | 0.82<br>(0.65, 0.99) | 0.69<br>(0.62, 0.75) | 0.86<br>(0.74, 0.97) | 0.72<br>(0.59, 0.84) | 0.60<br>(0.54, 0.67) | 0.02                        | -0.24<br>(-0.40, -0.08)    |
| Income-eligible nonparticipants       | 0.85<br>(0.75, 0.95) | 0.86<br>(0.73, 1.00) | 0.79<br>(0.67, 0.90) | 0.91<br>(0.77, 1.05) | 0.80<br>(0.71, 0.9)  | 0.81<br>(0.73, 0.89) | 0.71<br>(0.59, 0.83) | 0.58<br>(0.50, 0.67) | <0.001                      | -0.26<br>(-0.40, -0.13)    |
| Higher-Income Individuals             | 0.91<br>(0.83, 0.99) | 0.91<br>(0.85, 0.96) | 0.83<br>(0.76, 0.90) | 0.86<br>(0.78, 0.94) | 0.81<br>(0.73, 0.88) | 0.83<br>(0.79, 0.87) | 0.70<br>(0.65, 0.74) | 0.63<br>(0.60, 0.67) | <0.001<br>0.26 <sup>b</sup> | -0.28<br>0.89 <sup>b</sup> |
| <b>Cheese, servings/d</b>             |                      |                      |                      |                      |                      |                      |                      |                      |                             |                            |
| SNAP participants                     | 0.43<br>(0.32, 0.55) | 0.48<br>(0.36, 0.60) | 0.53<br>(0.44, 0.61) | 0.56<br>(0.45, 0.66) | 0.50<br>(0.45, 0.55) | 0.61<br>(0.55, 0.68) | 0.73<br>(0.66, 0.81) | 0.69<br>(0.63, 0.74) | <0.001                      | 0.25<br>(0.12, 0.38)       |
| Income-eligible nonparticipants       | 0.42<br>(0.33, 0.5)  | 0.40<br>(0.34, 0.47) | 0.50<br>(0.43, 0.58) | 0.47<br>(0.41, 0.52) | 0.53<br>(0.45, 0.62) | 0.60<br>(0.55, 0.65) | 0.69<br>(0.6, 0.79)  | 0.68<br>(0.6, 0.75)  | <0.001                      | 0.26<br>(0.15, 0.37)       |



|                                                    |                       |                      |                       |                       |                      |                      |                      |                       |                               |                                              |
|----------------------------------------------------|-----------------------|----------------------|-----------------------|-----------------------|----------------------|----------------------|----------------------|-----------------------|-------------------------------|----------------------------------------------|
| Higher-Income Individuals                          | 0.57<br>(0.53, 0.61)  | 0.54<br>(0.50, 0.58) | 0.59<br>(0.55, 0.63)  | 0.59<br>(0.56, 0.63)  | 0.62<br>(0.58, 0.65) | 0.68<br>(0.64, 0.72) | 0.67<br>(0.63, 0.71) | 0.69<br>(0.66, 0.73)  | <0.001<br>0.0012 <sup>b</sup> | 0.12<br>(0.07, 0.18)<br>0.06 <sup>b</sup>    |
| <b>Yogurt, servings/d</b>                          |                       |                      |                       |                       |                      |                      |                      |                       |                               |                                              |
| SNAP participants                                  | 0.01<br>(0, 0.02)     | 0.01<br>(0.00, 0.03) | 0.03<br>(0.02, 0.04)  | 0.02<br>(0.01, 0.03)  | 0.02<br>(0.01, 0.04) | 0.03<br>(0.02, 0.04) | 0.04<br>(0.03, 0.05) | 0.04<br>(0.02, 0.05)  | <0.001                        | 0.03<br>(0.01, 0.05)                         |
| Income-eligible nonparticipants                    | 0.02<br>(0.01, 0.04)  | 0.03<br>(0.00, 0.05) | 0.02<br>(0.01, 0.03)  | 0.05<br>(0.03, 0.07)  | 0.04<br>(0.02, 0.06) | 0.03<br>(0.02, 0.04) | 0.05<br>(0.04, 0.06) | 0.07<br>(0.04, 0.10)  | <0.001                        | 0.05<br>(0.02, 0.08)                         |
| Higher-Income Individuals                          | 0.05<br>(0.03, 0.06)  | 0.06<br>(0.05, 0.07) | 0.04<br>(0.03, 0.05)  | 0.05<br>(0.04, 0.06)  | 0.06<br>(0.05, 0.07) | 0.08<br>(0.07, 0.09) | 0.08<br>(0.07, 0.09) | 0.08<br>(0.07, 0.09)  | <0.001<br>0.32 <sup>b</sup>   | 0.03<br>(0.01, 0.05)<br>0.43 <sup>b</sup>    |
| <b>Sugar sweetened beverages, servings/d</b>       |                       |                      |                       |                       |                      |                      |                      |                       |                               |                                              |
| SNAP participants                                  | 2.29<br>(1.78, 2.81)  | 2.60<br>(2.2, 3.0)   | 2.24<br>(1.92, 2.55)  | 2.16<br>(1.75, 2.56)  | 2.47<br>(2.02, 2.92) | 2.14<br>(1.95, 2.32) | 1.78<br>(1.59, 1.97) | 1.87<br>(1.56, 2.17)  | 0.001                         | -0.43<br>(-1.02, 0.17)                       |
| Income-eligible nonparticipants                    | 2.09<br>(1.68, 2.5)   | 1.97<br>(1.72, 2.22) | 1.94<br>(1.75, 2.12)  | 1.79<br>(1.53, 2.04)  | 1.68<br>(1.41, 1.95) | 1.54<br>(1.36, 1.73) | 1.48<br>(1.28, 1.68) | 1.16<br>(0.98, 1.34)  | <0.001                        | -0.93<br>(-1.37, -0.49)                      |
| Higher-Income Individuals                          | 1.59<br>(1.44, 1.74)  | 1.48<br>(1.30, 1.66) | 1.44<br>(1.28, 1.60)  | 1.27<br>(1.15, 1.39)  | 1.23<br>(1.09, 1.37) | 1.05<br>(0.97, 1.13) | 1.05<br>(0.88, 1.22) | 0.80<br>(0.71, 0.88)  | <0.001<br>0.60 <sup>b</sup>   | -0.80<br>(-0.97, -0.63)<br>0.25 <sup>b</sup> |
| <b>Added sugars, tsp equivalents/d, servings/d</b> |                       |                      |                       |                       |                      |                      |                      |                       |                               |                                              |
| SNAP participants                                  | 23.9<br>(21.0, 26.8)  | 26.9<br>(22.9, 30.9) | 22.0<br>(19.9, 24.0)  | 20.3<br>(18.3, 22.3)  | 22.5<br>(20.1, 24.9) | 21.0<br>(19.9, 22.1) | 19.0<br>(17.6, 20.3) | 19.9<br>(18.4, 21.5)  | <0.001                        | -4.0<br>(-7.3, -0.7)                         |
| Income-eligible nonparticipants                    | 23.5<br>(21.0, 25.9)  | 21.1<br>(19.7, 22.6) | 20.1<br>(18.5, 21.6)  | 18.93<br>(17.3, 20.6) | 20.2<br>(18.0, 22.3) | 17.4<br>(16.2, 18.5) | 16.9<br>(15.6, 18.2) | 15.8<br>(14.5, 17.1)  | <0.001                        | -7.6<br>(-10.4, -4.9)                        |
| Higher-Income Individuals                          | 19.6<br>(18.3, 20.8)  | 18.4<br>(17.3, 19.6) | 16.6<br>(15.9, 17.3)  | 15.9<br>(15.2, 16.6)  | 16.0<br>(15.1, 16.9) | 15.2<br>(14.6, 15.8) | 15.2<br>(14.4, 15.9) | 13.6<br>(13.1, 14.1)  | <0.001<br>0.24 <sup>b</sup>   | -6.0<br>(-7.3, -4.7)<br>0.05 <sup>b</sup>    |
| <b>Total fat, % of energy</b>                      |                       |                      |                       |                       |                      |                      |                      |                       |                               |                                              |
| SNAP participants                                  | 32.2<br>(30.9, 33.5)  | 31.7<br>(30.4, 33.1) | 33.0<br>(31.9, 34.14) | 33.1<br>(32.2, 34.0)  | 32.7<br>(31.8, 33.6) | 31.9<br>(31.3, 32.5) | 32.6<br>(32.0, 33.2) | 33.1<br>(32.6, 33.6)  | 0.29                          | 0.9<br>(-0.5, 2.3)                           |
| Income-eligible nonparticipants                    | 31.5<br>(30.2, 32.8)  | 32.9<br>(31.9, 33.9) | 33.3<br>(32.2, 34.4)  | 32.3<br>(31.7, 32.9)  | 31.8<br>(30.8, 32.9) | 31.4<br>(30.9, 31.9) | 32.5<br>(31.7, 33.2) | 33.4<br>(32.9, 33.9)  | 0.39                          | 1.9<br>(0.4, 3.3)                            |
| Higher-Income Individuals                          | 33.03<br>(32.2, 33.9) | 33.5<br>(32.9, 34.0) | 34.1<br>(33.4, 34.8)  | 34.0<br>(33.5, 34.4)  | 34.0<br>(33.6, 34.5) | 33.5<br>(33.0, 33.9) | 33.7<br>(33.1, 34.3) | 34.9<br>(34.5, 35.2)  | 0.004<br>0.53 <sup>b</sup>    | 1.8<br>(0.9, 2.7)<br>0.43 <sup>b</sup>       |
| <b>Saturated fat, % of energy</b>                  |                       |                      |                       |                       |                      |                      |                      |                       |                               |                                              |
| SNAP participants                                  | 11.1<br>(10.5, 11.6)  | 10.3<br>(9.9, 10.9)  | 11.1<br>(10.5, 11.7)  | 11.4<br>(10.9, 12.0)  | 10.8<br>(10.4, 11.1) | 10.7<br>(10.5, 10.8) | 10.8<br>(10.5, 11.1) | 10.9<br>(10.6, 11.16) | 0.61                          | -0.2<br>(-0.8, 0.4)                          |
| Income-eligible nonparticipants                    | 10.3<br>(9.8, 10.7)   | 10.4<br>(10.0, 10.7) | 10.9<br>(10.5, 11.3)  | 10.8<br>(10.5, 11.0)  | 10.5<br>(9.9, 11.0)  | 10.2<br>(9.9, 10.5)  | 10.6<br>(10.2, 11.1) | 10.9<br>(10.7, 11.2)  | 0.14                          | 0.6<br>(0.1, 1.2)                            |
| Higher-Income Individuals                          | 11.0<br>(10.7, 11.4)  | 10.6<br>(10.4, 10.8) | 11.2<br>(11.0, 11.5)  | 11.3<br>(11.2, 11.5)  | 11.2<br>(11.0, 11.4) | 10.8<br>(10.6, 11.0) | 10.7<br>(10.5, 11.0) | 11.1<br>(11.0, 11.3)  | 0.96<br>0.25 <sup>b</sup>     | 0.1<br>(-0.3, 0.5)<br>0.04 <sup>b</sup>      |
| <b>Monounsaturated fat, % of energy</b>            |                       |                      |                       |                       |                      |                      |                      |                       |                               |                                              |
| SNAP participants                                  | 18.5<br>(10.1, 27.0)  | 16.3<br>(13.2, 19.4) | 14.2<br>(13.4, 15.0)  | 14.7<br>(13.5, 16.0)  | 16.1<br>(14.5, 17.6) | 13.1<br>(12.7, 13.5) | 13.4<br>(12.5, 14.2) | 13.4<br>(12.8, 14.1)  | 0.05                          | -5.1<br>(-13.5, 3.3)                         |
| Income-eligible nonparticipants                    | 15.7<br>(14.2, 17.2)  | 16.2<br>(14.9, 17.6) | 14.8<br>(13.9, 15.6)  | 14.0<br>(13.0, 15.0)  | 15.0<br>(13.9, 16.2) | 13.6<br>(12.9, 14.3) | 12.8<br>(11.8, 13.8) | 13.6<br>(13.0, 14.2)  | <0.001                        | -2.1<br>(-3.7, -0.6)                         |
| Higher-Income Individuals                          | 13.9                  | 13.2                 | 13.4                  | 13.6                  | 13.8                 | 13.1                 | 13.0                 | 13.6                  | 0.22                          | -0.3                                         |

|                                             |                      |                      |                      |                      |                      |                      |                      |                      |                     |                                  |
|---------------------------------------------|----------------------|----------------------|----------------------|----------------------|----------------------|----------------------|----------------------|----------------------|---------------------|----------------------------------|
|                                             | (13.2, 14.6)         | (12.8, 13.7)         | (12.9, 13.9)         | (13.1, 14.1)         | (13.4, 14.2)         | (12.7, 13.5)         | (12.5, 13.5)         | (13.2, 13.9)         | <0.001 <sup>b</sup> | (-1.1, 0.5)<br>0.04 <sup>b</sup> |
| <b>Polyunsaturated fat, % of energy</b>     |                      |                      |                      |                      |                      |                      |                      |                      |                     |                                  |
| SNAP participants                           | 6.1<br>(5.8, 6.4)    | 6.3<br>(5.9, 6.6)    | 6.7<br>(6.4, 7.0)    | 6.6<br>(6.1, 7.1)    | 6.8<br>(6.5, 7.1)    | 6.8<br>(6.5, 7.1)    | 7.6<br>(7.4, 7.8)    | 7.6<br>(7.3, 7.9)    | <0.001              | 1.5<br>(1.1, 1.9)                |
| Income-eligible nonparticipants             | 6.9<br>(6.5, 7.3)    | 6.9<br>(6.5, 7.2)    | 7.1<br>(6.6, 7.6)    | 6.8<br>(6.6, 7.0)    | 6.9<br>(6.7, 7.1)    | 7.0<br>(6.8, 7.2)    | 7.7<br>(7.4, 7.9)    | 7.7<br>(7.4, 7.9)    | <0.001              | 0.7<br>(0.2, 1.2)                |
| Higher-Income Individuals                   | 7.0<br>(6.8, 7.2)    | 6.9<br>(6.8, 7.0)    | 7.3<br>(7.1, 7.5)    | 7.3<br>(7.1, 7.5)    | 7.4<br>(7.3, 7.5)    | 7.6<br>(7.4, 7.7)    | 8.2<br>(8.0, 8.3)    | 8.2<br>(8.1, 8.4)    | <0.001              | 1.3<br>(1.0, 1.5)                |
|                                             |                      |                      |                      |                      |                      |                      |                      |                      | 0.003 <sup>b</sup>  | 0.06 <sup>b</sup>                |
| <b>Seafood omega-3 fat, mg/d</b>            |                      |                      |                      |                      |                      |                      |                      |                      |                     |                                  |
| SNAP participants                           | 123<br>(66, 179)     | 88<br>(52, 125)      | 96<br>(73, 119)      | 119<br>(73, 166)     | 107<br>(81, 134)     | 103<br>(85, 120)     | 114<br>(94, 135)     | 103<br>(74, 132)     | 0.98                | -20<br>(-82, 43)                 |
| Income-eligible nonparticipants             | 132<br>(96, 168)     | 118<br>(84, 151)     | 109<br>(84, 134)     | 108<br>(81, 134)     | 142<br>(108, 175)    | 125<br>(98, 151)     | 114<br>(93, 136)     | 79<br>(64, 95)       | 0.09                | -53<br>(-92, -14)                |
| Higher-Income Individuals                   | 123<br>(107, 139)    | 131<br>(114, 148)    | 144<br>(121, 168)    | 168<br>(141, 195)    | 162<br>(146, 178)    | 131<br>(113, 149)    | 117<br>(99, 135)     | 122<br>(108, 135)    | 0.21                | -1<br>(-22, 19)                  |
|                                             |                      |                      |                      |                      |                      |                      |                      |                      | 0.56 <sup>b</sup>   | 0.06 <sup>b</sup>                |
| <b>Plant omega-3 fat, mg/d</b>              |                      |                      |                      |                      |                      |                      |                      |                      |                     |                                  |
| SNAP participants                           | 117<br>(107, 126)    | 125<br>(117, 132)    | 127<br>(122, 131)    | 125<br>(117, 132)    | 129<br>(124, 134)    | 132<br>(126, 138)    | 155<br>(149, 160)    | 146<br>(141, 151)    | <0.001              | 29<br>(18, 39)                   |
| Income-eligible nonparticipants             | 125<br>(116, 133)    | 134<br>(125, 143)    | 143<br>(131, 155)    | 133<br>(128, 138)    | 137<br>(129, 144)    | 141<br>(136, 146)    | 161<br>(155, 166)    | 149<br>(143, 154)    | <0.001              | 24<br>(14, 34)                   |
| Higher-Income Individuals                   | 138<br>(133, 143)    | 137<br>(135, 139)    | 145<br>(140, 149)    | 144<br>(140, 149)    | 144<br>(141, 148)    | 153<br>(150, 156)    | 170<br>(165, 174)    | 166<br>(161, 170)    | <0.001              | 27<br>(21, 34)                   |
|                                             |                      |                      |                      |                      |                      |                      |                      |                      | 0.32 <sup>b</sup>   | 0.80 <sup>b</sup>                |
| <b>Polyunsaturated: saturated fat ratio</b> |                      |                      |                      |                      |                      |                      |                      |                      |                     |                                  |
| SNAP participants                           | 0.63<br>(0.58, 0.67) | 0.70<br>(0.66, 0.74) | 0.66<br>(0.63, 0.69) | 0.65<br>(0.59, 0.71) | 0.69<br>(0.66, 0.72) | 0.69<br>(0.66, 0.73) | 0.77<br>(0.74, 0.80) | 0.77<br>(0.73, 0.81) | <0.001              | 0.14<br>(0.08, 0.20)             |
| Income-eligible nonparticipants             | 0.75<br>(0.71, 0.78) | 0.76<br>(0.71, 0.81) | 0.73<br>(0.7, 0.76)  | 0.69<br>(0.66, 0.73) | 0.75<br>(0.68, 0.83) | 0.75<br>(0.73, 0.78) | 0.79<br>(0.75, 0.82) | 0.76<br>(0.73, 0.79) | 0.15                | 0.01<br>(-0.03, 0.06)            |
| Higher-Income Individuals                   | 0.72<br>(0.69, 0.75) | 0.73<br>(0.71, 0.76) | 0.70<br>(0.69, 0.72) | 0.70<br>(0.69, 0.72) | 0.72<br>(0.70, 0.74) | 0.77<br>(0.75, 0.79) | 0.82<br>(0.8, 0.84)  | 0.80<br>(0.79, 0.82) | <0.001              | 0.09<br>(0.05, 0.12)             |
|                                             |                      |                      |                      |                      |                      |                      |                      |                      | <0.001 <sup>b</sup> | 0.01 <sup>b</sup>                |
| <b>Protein, % of energy</b>                 |                      |                      |                      |                      |                      |                      |                      |                      |                     |                                  |
| SNAP participants                           | 15.1<br>(14.4, 15.9) | 14.5<br>(13.8, 15.2) | 14.8<br>(14.2, 15.4) | 15.6<br>(14.8, 16.4) | 15.4<br>(14.9, 15.8) | 15.4<br>(15.0, 15.7) | 15.5<br>(15.2, 15.9) | 15.5<br>(15.0, 16.1) | 0.02                | 0.4<br>(-0.5, 1.3)               |
| Income-eligible nonparticipants             | 14.8<br>(14.3, 15.3) | 15.2<br>(14.6, 15.7) | 14.9<br>(14.4, 15.4) | 16.0<br>(15.3, 16.8) | 15.6<br>(15.2, 16.0) | 16.1<br>(15.6, 16.5) | 16.0<br>(15.5, 16.5) | 16.2<br>(15.5, 16.8) | <0.001              | 1.4<br>(0.6, 2.2)                |
| Higher-Income Individuals                   | 15.5<br>(15.3, 15.7) | 15.3<br>(15.0, 15.6) | 15.9<br>(15.6, 16.1) | 16.2<br>(15.9, 16.4) | 16.1<br>(15.9, 16.3) | 16.2<br>(15.9, 16.6) | 15.9<br>(15.6, 16.2) | 16.6<br>(16.3, 16.8) | <0.001              | 1.1<br>(0.7, 1.4)                |
|                                             |                      |                      |                      |                      |                      |                      |                      |                      | 0.29 <sup>b</sup>   | 0.30 <sup>b</sup>                |
| <b>Carbohydrate, % of energy</b>            |                      |                      |                      |                      |                      |                      |                      |                      |                     |                                  |
| SNAP participants                           | 51.4<br>(49.9, 52.9) | 53.8<br>(52.4, 55.3) | 50.9<br>(49.8, 52.1) | 49.3<br>(47.2, 51.5) | 51.0<br>(49.8, 52.3) | 51.5<br>(50.7, 52.3) | 50.4<br>(49.2, 51.5) | 50.1<br>(49.3, 50.9) | 0.008               | -1.3<br>(-3.0, 0.5)              |
| Income-eligible nonparticipants             | 53.3<br>(51.9, 54.6) | 51.7<br>(50.6, 52.8) | 50.9<br>(50.1, 51.8) | 50.8<br>(49.9, 51.7) | 51.4<br>(50.4, 52.4) | 50.9<br>(50.4, 51.3) | 50.9<br>(50.2, 51.6) | 49.3<br>(48.4, 50.1) | <0.001              | -4.0<br>(-5.6, -2.4)             |
| Higher-Income Individuals                   | 50.1<br>(49.3, 50.9) | 50.3<br>(49.4, 51.2) | 48.4<br>(47.7, 49.1) | 48.3<br>(47.8, 48.9) | 48.5<br>(48.0, 49.1) | 48.6<br>(48.1, 49.1) | 48.5<br>(47.7, 49.2) | 46.8<br>(46.3, 47.2) | <0.001              | -3.3<br>(-4.2, -2.4)             |

|                                 |                       |                      |                      |                      |                      |                      |                      |                      |                    |                     |
|---------------------------------|-----------------------|----------------------|----------------------|----------------------|----------------------|----------------------|----------------------|----------------------|--------------------|---------------------|
|                                 |                       |                      |                      |                      |                      |                      |                      |                      | 0.47 <sup>b</sup>  | 0.04 <sup>b</sup>   |
| <b>Cholesterol, mg/d</b>        |                       |                      |                      |                      |                      |                      |                      |                      |                    |                     |
| SNAP participants               | 316<br>(283, 348)     | 254<br>(226, 281)    | 281<br>(266, 296)    | 284<br>(255, 313)    | 303<br>(288, 318)    | 276<br>(260, 291)    | 279<br>(261, 296)    | 267<br>(253, 281)    | 0.08               | -49<br>(-84, -14)   |
| Income-eligible nonparticipants | 271<br>(250, 292)     | 280<br>(261, 299)    | 278<br>(256, 299)    | 292<br>(271, 313)    | 278<br>(265, 291)    | 287<br>(264, 310)    | 271<br>(253, 290)    | 269<br>(249, 289)    | 0.72               | -3<br>(-31, 26)     |
| Higher-Income Individuals       | 267<br>(257, 278)     | 257<br>(249, 266)    | 277<br>(266, 288)    | 277<br>(268, 286)    | 281<br>(271, 291)    | 266<br>(257, 274)    | 273<br>(261, 284)    | 278<br>(271, 284)    | 0.06               | 10<br>(-2, 22)      |
|                                 |                       |                      |                      |                      |                      |                      |                      |                      | 0.05 <sup>b</sup>  | 0.01 <sup>b</sup>   |
| <b>Fiber, g/d</b>               |                       |                      |                      |                      |                      |                      |                      |                      |                    |                     |
| SNAP participants               | 13.7<br>(10.7, 16.7)  | 13.2<br>(12.3, 14.1) | 12.7<br>(11.9, 13.5) | 13.1<br>(12.0, 14.2) | 13.7<br>(12.7, 14.6) | 14.6<br>(13.9, 15.4) | 15.6<br>(14.6, 16.6) | 13.5<br>(12.6, 14.4) | 0.10               | -0.2<br>(-3.3, 2.9) |
| Income-eligible nonparticipants | 14.7<br>(13.6, 15.7)  | 14.8<br>(13.7, 15.9) | 15.0<br>(14.1, 16.0) | 15.8<br>(15.0, 16.7) | 15.7<br>(14.4, 17.0) | 16.5<br>(16.1, 17.0) | 17.6<br>(16.5, 18.7) | 15.7<br>(14.9, 16.6) | <0.001             | 1.1<br>(-0.2, 2.4)  |
| Higher-Income Individuals       | 15.35<br>(14.6, 16.1) | 15.7<br>(15.2, 16.2) | 15.4<br>(14.9, 15.9) | 16.0<br>(15.5, 16.5) | 16.6<br>(16.0, 17.2) | 17.7<br>(17.3, 18.1) | 18.1<br>(17.6, 18.7) | 17.0<br>(16.7, 17.4) | <0.001             | 1.7<br>(0.9, 2.5)   |
|                                 |                       |                      |                      |                      |                      |                      |                      |                      | 0.24 <sup>b</sup>  | 0.29 <sup>b</sup>   |
| <b>Sodium, mg/d</b>             |                       |                      |                      |                      |                      |                      |                      |                      |                    |                     |
| SNAP participants               | 3383<br>(3178, 3587)  | 3297<br>(3097, 3498) | 3280<br>(3164, 3395) | 3344<br>(3164, 3525) | 3433<br>(3361, 3504) | 3361<br>(3304, 3418) | 3381<br>(3298, 3464) | 3100<br>(3029, 3172) | 0.06               | -282<br>(-497, -67) |
| Income-eligible nonparticipants | 3285<br>(3145, 3425)  | 3401<br>(3272, 3530) | 3433<br>(3274, 3592) | 3428<br>(3278, 3578) | 3411<br>(3291, 3531) | 3493<br>(3381, 3606) | 3533<br>(3422, 3643) | 3239<br>(3159, 3319) | 0.51               | -46<br>(-206, 114)  |
| Higher-Income Individuals       | 3459<br>(3389, 3529)  | 3354<br>(3310, 3398) | 3484<br>(3432, 3536) | 3601<br>(3530, 3672) | 3564<br>(3511, 3617) | 3509<br>(3461, 3557) | 3438<br>(3400, 3476) | 3330<br>(3278, 3381) | 0.20               | -129<br>(-215, -43) |
|                                 |                       |                      |                      |                      |                      |                      |                      |                      | 0.20 <sup>b</sup>  | 0.32 <sup>b</sup>   |
| <b>Potassium, mg/d</b>          |                       |                      |                      |                      |                      |                      |                      |                      |                    |                     |
| SNAP participants               | 2392<br>(2205, 2579)  | 2236<br>(2118, 2353) | 2359<br>(2268, 2450) | 2515<br>(2400, 2631) | 2352<br>(2269, 2436) | 2454<br>(2393, 2515) | 2452<br>(2382, 2522) | 2199<br>(2114, 2284) | 0.39               | -193<br>(-396, 11)  |
| Income-eligible nonparticipants | 2533<br>(2414, 2652)  | 2446<br>(2347, 2546) | 2501<br>(2425, 2577) | 2635<br>(2533, 2738) | 2519<br>(2425, 2612) | 2613<br>(2543, 2683) | 2625<br>(2538, 2711) | 2373<br>(2286, 2460) | 0.97               | -161<br>(-307, -15) |
| Higher-Income Individuals       | 2724<br>(2650, 2799)  | 2675<br>(2621, 2728) | 2659<br>(2620, 2699) | 2709<br>(2647, 2772) | 2687<br>(2631, 2743) | 2803<br>(2765, 2840) | 2779<br>(2720, 2838) | 2597<br>(2554, 2639) | 0.93               | -128<br>(-213, -43) |
|                                 |                       |                      |                      |                      |                      |                      |                      |                      | 0.66 <sup>b</sup>  | 0.73 <sup>b</sup>   |
| <b>Magnesium, mg/d</b>          |                       |                      |                      |                      |                      |                      |                      |                      |                    |                     |
| SNAP participants               | 234<br>(215, 252)     | 219<br>(209, 230)    | 231<br>(219, 243)    | 269<br>(252, 286)    | 253<br>(241, 264)    | 270<br>(262, 277)    | 274<br>(265, 282)    | 248<br>(234, 261)    | <0.001             | 14<br>(-9, 37)      |
| Income-eligible nonparticipants | 253<br>(241, 265)     | 250<br>(238, 262)    | 255<br>(243, 267)    | 282<br>(272, 291)    | 287<br>(268, 306)    | 292<br>(284, 300)    | 289<br>(277, 297)    | 277<br>(265, 288)    | <0.001             | 24<br>(8, 40)       |
| Higher-Income Individuals       | 273<br>(264, 282)     | 271<br>(263, 279)    | 271<br>(265, 277)    | 299<br>(293, 304)    | 297<br>(290, 305)    | 310<br>(306, 314)    | 310<br>(302, 317)    | 296<br>(292, 301)    | <0.001             | 23<br>(13, 33)      |
|                                 |                       |                      |                      |                      |                      |                      |                      |                      | 0.82 <sup>b</sup>  | 0.71 <sup>b</sup>   |
| <b>Calcium, mg/d</b>            |                       |                      |                      |                      |                      |                      |                      |                      |                    |                     |
| SNAP participants               | 698<br>(633, 763)     | 671<br>(627, 715)    | 761<br>(709, 814)    | 861<br>(781, 941)    | 794<br>(765, 824)    | 927<br>(905, 950)    | 944<br>(895, 992)    | 839<br>(808, 871)    | <0.001             | 141<br>(69, 213)    |
| Income-eligible nonparticipants | 717<br>(685, 748)     | 744<br>(689, 798)    | 776<br>(740, 812)    | 872<br>(827, 917)    | 903<br>(841, 966)    | 930<br>(906, 954)    | 968<br>(900, 1035)   | 881<br>(840, 921)    | <0.001             | 164<br>(113, 215)   |
| Higher-Income Individuals       | 806<br>(775, 838)     | 825<br>(805, 846)    | 841<br>(812, 870)    | 921<br>(898, 943)    | 930<br>(905, 954)    | 1001<br>(982, 1019)  | 936<br>(913, 960)    | 911<br>(895, 927)    | <0.001             | 105<br>(70, 140)    |
|                                 |                       |                      |                      |                      |                      |                      |                      |                      | 0.005 <sup>b</sup> | 0.21 <sup>b</sup>   |

---

Abbreviations: AHA, American Heart Association; SNAP: Supplemental Nutrition Assistance Program

<sup>a</sup>. Means were adjusted for energy to 2000 kcal/d using the residual method except for the means of fat, protein and carbohydrate, which were adjusted as percentage (%) of total energy

<sup>b</sup>. Survey-weighted P for interaction that assessed whether the trend in mean take or change in mean intake differed by SNAP participation status.

**eTable 3.** Adjusted Trends in the American Heart Association (AHA) 2020 Diet Score by SNAP Participation Status, 2003-2014<sup>a</sup>

| Diet Score                                                                                                  | Survey-Weighted Mean Score (95% CI) <sup>a</sup> |                       |                       |                       |                       |                       | P for Trend                 | Mean Change From 2003-2004 to 2013-2014 (95% CI) |
|-------------------------------------------------------------------------------------------------------------|--------------------------------------------------|-----------------------|-----------------------|-----------------------|-----------------------|-----------------------|-----------------------------|--------------------------------------------------|
|                                                                                                             | 2003-2004<br>(n=4066)                            | 2005-2006<br>(n=4030) | 2007-2008<br>(n=4654) | 2009-2010<br>(n=4996) | 2011-2012<br>(n=4288) | 2013-2014<br>(n=4437) |                             |                                                  |
| <b>Total AHA diet score (unadjusted)</b>                                                                    |                                                  |                       |                       |                       |                       |                       |                             |                                                  |
| SNAP participants                                                                                           | 31.5 (29.2, 33.8)                                | 30.8 (28.6, 32.9)     | 31.1 (29.5, 32.8)     | 32.8 (31.2, 34.5)     | 33.8 (32.7, 34.8)     | 32.1 (30.6, 33.6)     | 0.11                        | 0.57 (-2.18, 0.33)                               |
| Income-eligible nonparticipants                                                                             | 34.2 (32.6, 35.9)                                | 34.7 (33.1, 36.3)     | 34.9 (32.7, 37.1)     | 36.3 (34.8, 37.9)     | 36.5 (35.2, 37.7)     | 36.8 (35.3, 38.3)     | 0.004                       | 2.56 (0.36, 4.76)                                |
| Higher-income individuals                                                                                   | 35.8 (34.6, 36.9)                                | 36.4 (35.3, 37.4)     | 36.7 (35.5, 37.8)     | 38.7 (37.9, 39.4)     | 40.0 (38.5, 41.5)     | 39.6 (38.7, 40.5)     | <0.001<br>0.02 <sup>b</sup> | 3.84 (2.39, 5.29)<br>0.04 <sup>c</sup>           |
| <b>Total AHA diet score (adjusted for differences in age, sex, and race/ethnicity over time)</b>            |                                                  |                       |                       |                       |                       |                       |                             |                                                  |
| SNAP participants                                                                                           | 32.5 (30.4, 34.6)                                | 31.9 (29.8, 34.1)     | 31.9 (30.4, 33.3)     | 33.3 (31.8, 34.8)     | 34.4 (33.4, 35.5)     | 32.5 (30.9, 34.1)     | 0.21                        | 0.01 (-2.17, 2.20)                               |
| Income-eligible nonparticipants                                                                             | 34.4 (32.8, 35.9)                                | 34.4 (32.9, 36.0)     | 34.6 (32.2, 37.1)     | 36.3 (34.7, 38.0)     | 36.4 (35.0, 37.7)     | 36.7 (35.2, 38.3)     | 0.008                       | 2.16 (0.01, 4.30)                                |
| Higher-income individuals                                                                                   | 35.9 (34.8, 37.1)                                | 36.5 (35.4, 37.5)     | 36.7 (35.5, 37.8)     | 38.5 (37.8, 39.2)     | 39.7 (38.1, 41.2)     | 39.2 (38.3, 40.2)     | <0.001<br>0.01 <sup>b</sup> | 3.33 (1.86, 4.80)<br>0.02 <sup>c</sup>           |
| <b>Total AHA diet score (adjusted for differences in age, sex, race/ethnicity, and education over time)</b> |                                                  |                       |                       |                       |                       |                       |                             |                                                  |
| SNAP participants                                                                                           | 34.2 (32.2,36.1)                                 | 33.4(31.2,35.5)       | 33.7(32.3,35.1)       | 35(33.6,36.4)         | 35.8(34.7,36.8)       | 33.9(32.4,35.4)       | 0.35                        | -0.25 (-2.36, 1.89)                              |
| Income-eligible nonparticipants                                                                             | 35.8 (34.3,37.3)                                 | 35.6(34.1,37.1)       | 35.9(33.8,38)         | 37.1(35.7,38.6)       | 37.3(36.2,38.4)       | 37.4(35.9,39)         | 0.04                        | 1.51 (-0.54, 3.57)                               |
| Higher-income individuals                                                                                   | 35.9 (34.9,36.8)                                 | 36.3(35.3,37.3)       | 36.5(35.5,37.4)       | 38.1(37.4,38.7)       | 38.8(37.3,40.2)       | 38.3(37.4,39.2)       | <0.001<br>0.06 <sup>b</sup> | 2.48 (1.23, 3.72)<br>0.048 <sup>c</sup>          |
| <b>Total AHA diet score (adjusted for differences in age, sex, race/ethnicity, and income over time)</b>    |                                                  |                       |                       |                       |                       |                       |                             |                                                  |
| SNAP participants                                                                                           | 34.8 (32.8, 36.9)                                | 33.9 (31.7,36.1)      | 34.2(32.6,35.9)       | 35.7 (34.3,37.0)      | 36.6(35.4,37.7)       | 34.5(33,36)           | 0.27                        | -0.16 (-2.33, 2.01)                              |
| Income-eligible nonparticipants                                                                             | 37.0 (35.4, 38.6)                                | 37.1 (35.5,38.7)      | 37.3(34.9,39.6)       | 39.0 (37.3,40.7)      | 39.1(37.6,40.6)       | 39.3(37.6,40.9)       | <0.01                       | 2.18 (0.04, 4.32)                                |
| Higher-income individuals                                                                                   | 35.1 (34.0, 36.2)                                | 35.6 (34.5,36.7)      | 35.8(34.5,37.1)       | 37.6(36.9,38.3)       | 38.9(37.3,40.5)       | 38.3(37.4,39.2)       | <0.001<br>0.04 <sup>b</sup> | 3.17 (1.78, 4.56)<br>0.01 <sup>c</sup>           |

Abbreviations: AHA, American Heart Association; SNAP: Supplemental Nutrition Assistance Program

<sup>a</sup>. The total AHA diet score is the sum of the scores for 8 primary dietary components (fruits/vegetables, whole grains, fish/shellfish, sugar-sweetened beverages, and sodium, nuts/seeds/legumes, processed meat, and saturated fat).

<sup>b</sup>. P for interaction assessing potential heterogeneous trends in total AHA diet score by SNAP participation status (SNAP participants, income-eligible nonparticipants, and higher-income individuals)

<sup>c</sup>. P for interaction assessing potential heterogeneous changes in total AHA diet score from 2003-2004 to 2013-2014 by SNAP participation status (SNAP participants, income-eligible nonparticipants, and higher-income individuals)

**eTable 4.** Adjusted Trends in AHA Diet Score Among U.S. Adults by SNAP Participation Status, 2003-2014<sup>a</sup>

| Diet Score                       | Survey-Weighted Mean Score (95% CI) |                       |                       |                       |                       |                       | P for Trend        | Mean Change From 2003-2004 To 2013-2014 (95% CI) |
|----------------------------------|-------------------------------------|-----------------------|-----------------------|-----------------------|-----------------------|-----------------------|--------------------|--------------------------------------------------|
|                                  | 2003-2004<br>(n=4066)               | 2005-2006<br>(n=4030) | 2007-2008<br>(n=4654) | 2009-2010<br>(n=4996) | 2011-2012<br>(n=4288) | 2013-2014<br>(n=4437) |                    |                                                  |
| <b>Total AHA Diet Score</b>      |                                     |                       |                       |                       |                       |                       |                    |                                                  |
| SNAP participants                | 32.5<br>(30.4, 34.6)                | 31.9<br>(29.8, 34.1)  | 31.9<br>(30.4, 33.3)  | 33.3<br>(31.8, 34.8)  | 34.4<br>(33.4, 35.5)  | 32.5<br>(30.9, 34.1)  | 0.21               | 0.0<br>(-2.2, 2.2)                               |
| Income-eligible nonparticipants  | 34.4<br>(32.8, 35.9)                | 34.4<br>(32.9, 36.0)  | 34.6<br>(32.2, 37.1)  | 36.3<br>(34.7, 38.0)  | 36.4<br>(35.0, 37.7)  | 36.7<br>(35.2, 38.3)  | 0.008              | 2.2<br>(0.0, 4.3)                                |
| Higher-Income Individuals        | 35.9<br>(34.8, 37.1)                | 36.5<br>(35.4, 37.5)  | 36.7<br>(35.5, 37.8)  | 38.5<br>(37.8, 39.2)  | 39.7<br>(38.1, 41.2)  | 39.2<br>(38.3, 40.2)  | <0.001             | 3.3<br>(1.9, 4.8)                                |
|                                  |                                     |                       |                       |                       |                       |                       | 0.01 <sup>b</sup>  | 0.02 <sup>b</sup>                                |
| <b>Fruits and vegetables</b>     |                                     |                       |                       |                       |                       |                       |                    |                                                  |
| SNAP participants                | 4.04<br>(3.71, 4.38)                | 4.13<br>(3.69, 4.58)  | 4.00<br>(3.62, 4.37)  | 4.07<br>(3.79, 4.35)  | 4.20<br>(3.94, 4.46)  | 3.77<br>(3.46, 4.07)  | 0.45               | -0.25<br>(-0.67, 0.16)                           |
| Income-eligible nonparticipants  | 4.67<br>(4.20, 5.14)                | 4.79<br>(4.54, 5.04)  | 4.45<br>(4.10, 4.80)  | 4.75<br>(4.53, 4.98)  | 4.86<br>(4.50, 5.22)  | 4.61<br>(4.21, 5.01)  | 0.85               | -0.11<br>(-0.69, 0.48)                           |
| Higher-Income Individuals        | 5.22<br>(4.96, 5.48)                | 5.17<br>(4.96, 5.39)  | 5.16<br>(4.90, 5.41)  | 5.39<br>(5.25, 5.53)  | 5.36<br>(5.07, 5.65)  | 5.10<br>(4.93, 5.27)  | 0.81               | -0.11<br>(-0.43, 0.2)                            |
|                                  |                                     |                       |                       |                       |                       |                       | 0.63 <sup>b</sup>  | 0.80 <sup>b</sup>                                |
| <b>Whole grains</b>              |                                     |                       |                       |                       |                       |                       |                    |                                                  |
| SNAP participants                | 1.71<br>(1.22, 2.19)                | 1.79<br>(1.47, 2.12)  | 1.79<br>(1.59, 1.99)  | 2.19<br>(1.89, 2.48)  | 2.61<br>(2.25, 2.96)  | 2.40<br>(2.18, 2.62)  | <0.001             | 0.68<br>(0.20, 1.17)                             |
| Income-eligible nonparticipants  | 2.01<br>(1.59, 2.42)                | 2.20<br>(1.83, 2.56)  | 2.07<br>(1.74, 2.41)  | 2.64<br>(2.33, 2.96)  | 2.79<br>(2.47, 3.11)  | 2.67<br>(2.26, 3.08)  | 0.002              | 0.66<br>(0.09, 1.24)                             |
| Higher-Income Individuals        | 2.15<br>(1.96, 2.34)                | 2.52<br>(2.36, 2.67)  | 2.54<br>(2.30, 2.78)  | 2.95<br>(2.77, 3.13)  | 3.23<br>(2.98, 3.47)  | 3.14<br>(3.02, 3.25)  | <0.001             | 0.99<br>(0.77, 1.22)                             |
|                                  |                                     |                       |                       |                       |                       |                       | 0.51 <sup>b</sup>  | 0.30 <sup>b</sup>                                |
| <b>Fish and shellfish</b>        |                                     |                       |                       |                       |                       |                       |                    |                                                  |
| SNAP participants                | 2.16<br>(1.64, 2.67)                | 1.93<br>(1.36, 2.51)  | 1.88<br>(1.54, 2.22)  | 2.34<br>(1.75, 2.93)  | 2.06<br>(1.67, 2.46)  | 1.90<br>(1.38, 2.43)  | 0.90               | -0.20<br>(-0.89, 0.49)                           |
| Income-eligible nonparticipants  | 2.30<br>(1.80, 2.79)                | 2.18<br>(1.73, 2.62)  | 2.06<br>(1.54, 2.58)  | 2.60<br>(2.02, 3.18)  | 2.09<br>(1.63, 2.56)  | 2.14<br>(1.76, 2.52)  | 0.76               | -0.14<br>(-0.72, 0.44)                           |
| Higher-Income Individuals        | 2.70<br>(2.37, 3.03)                | 2.79<br>(2.54, 3.05)  | 2.62<br>(2.33, 2.92)  | 2.83<br>(2.54, 3.13)  | 2.64<br>(2.26, 3.03)  | 2.66<br>(2.32, 3.00)  | 0.73               | -0.04<br>(-0.51, 0.42)                           |
|                                  |                                     |                       |                       |                       |                       |                       | 0.99 <sup>b</sup>  | 0.82 <sup>b</sup>                                |
| <b>Sugar-sweetened beverages</b> |                                     |                       |                       |                       |                       |                       |                    |                                                  |
| SNAP participants                | 4.44<br>(3.87, 5.00)                | 5.26<br>(4.63, 5.89)  | 4.87<br>(4.26, 5.48)  | 5.09<br>(4.68, 5.50)  | 5.82<br>(5.35, 6.29)  | 5.16<br>(4.43, 5.89)  | 0.04               | 0.68<br>(-0.13, 1.48)                            |
| Income-eligible nonparticipants  | 4.84<br>(4.29, 5.40)                | 5.53<br>(4.89, 6.17)  | 5.42<br>(4.84, 6.00)  | 5.94<br>(5.37, 6.50)  | 6.17<br>(5.68, 6.66)  | 6.85<br>(6.21, 7.48)  | <0.001             | 1.97<br>(1.17, 2.77)                             |
| Higher-Income Individuals        | 5.98<br>(5.59, 6.36)                | 6.53<br>(6.23, 6.83)  | 6.49<br>(6.22, 6.76)  | 7.00<br>(6.78, 7.22)  | 6.96<br>(6.56, 7.36)  | 7.25<br>(6.92, 7.57)  | <0.001             | 1.29<br>(0.80, 1.78)                             |
|                                  |                                     |                       |                       |                       |                       |                       | 0.07 <sup>b</sup>  | 0.07 <sup>b</sup>                                |
| <b>Sodium</b>                    |                                     |                       |                       |                       |                       |                       |                    |                                                  |
| SNAP participants                | 4.26<br>(3.91, 4.61)                | 4.04<br>(3.52, 4.55)  | 3.79<br>(3.60, 3.99)  | 3.86<br>(3.64, 4.08)  | 3.87<br>(3.60, 4.14)  | 3.92<br>(3.58, 4.26)  | 0.23               | -0.34<br>(-0.81, 0.14)                           |
| Income-eligible nonparticipants  | 3.87<br>(3.40, 4.35)                | 3.80<br>(3.43, 4.17)  | 3.77<br>(3.54, 4.00)  | 3.67<br>(3.42, 3.93)  | 3.55<br>(3.36, 3.75)  | 3.72<br>(3.39, 4.05)  | 0.35               | -0.15<br>(-0.71, 0.41)                           |
| Higher-Income Individuals        | 3.66<br>(3.49, 3.84)                | 3.39<br>(3.25, 3.54)  | 3.42<br>(3.31, 3.52)  | 3.57<br>(3.41, 3.74)  | 3.83<br>(3.74, 3.93)  | 3.76<br>(3.62, 3.91)  | 0.003              | 0.09<br>(-0.13, 0.31)                            |
|                                  |                                     |                       |                       |                       |                       |                       | 0.007 <sup>b</sup> | 0.15 <sup>b</sup>                                |

---

**Nuts, seeds and legumes**

|                                 |                      |                      |                      |                      |                      |                      |                   |                         |
|---------------------------------|----------------------|----------------------|----------------------|----------------------|----------------------|----------------------|-------------------|-------------------------|
| SNAP participants               | 4.02<br>(3.67, 4.37) | 4.02<br>(3.23, 4.80) | 3.73<br>(3.08, 4.38) | 4.08<br>(3.68, 4.49) | 4.14<br>(3.54, 4.74) | 4.16<br>(3.75, 4.57) | 0.38              | 0.16<br>(-0.41, 0.72)   |
| Income-eligible nonparticipants | 4.58<br>(4.08, 5.08) | 3.97<br>(3.53, 4.41) | 4.46<br>(3.87, 5.04) | 4.42<br>(3.90, 4.94) | 4.62<br>(3.99, 5.24) | 4.77<br>(4.23, 5.31) | 0.34              | 0.13<br>(-0.64, 0.91)   |
| Higher-Income Individuals       | 4.43<br>(4.19, 4.66) | 4.65<br>(4.33, 4.97) | 4.72<br>(4.35, 5.09) | 4.78<br>(4.53, 5.03) | 5.47<br>(5.16, 5.77) | 5.39<br>(5.10, 5.68) | <0.001            | 0.97<br>(0.61, 1.34)    |
|                                 |                      |                      |                      |                      |                      |                      | 0.03 <sup>b</sup> | 0.02 <sup>b</sup>       |
| <b>Processed meat</b>           |                      |                      |                      |                      |                      |                      |                   |                         |
| SNAP participants               | 7.02<br>(6.68, 7.36) | 6.12<br>(5.40, 6.85) | 6.45<br>(6.00, 6.90) | 6.35<br>(5.90, 6.80) | 6.37<br>(5.85, 6.88) | 6.11<br>(5.65, 6.57) | 0.03              | -0.90<br>(-1.45, -0.36) |
| Income-eligible nonparticipants | 7.00<br>(6.52, 7.49) | 6.77<br>(6.41, 7.12) | 6.70<br>(6.13, 7.27) | 6.69<br>(6.31, 7.08) | 6.73<br>(6.43, 7.04) | 6.67<br>(6.21, 7.13) | 0.28              | -0.36<br>(-1.01, 0.29)  |
| Higher-Income Individuals       | 6.74<br>(6.56, 6.92) | 6.49<br>(6.15, 6.83) | 6.69<br>(6.47, 6.92) | 6.65<br>(6.39, 6.92) | 6.72<br>(6.40, 7.04) | 6.86<br>(6.59, 7.14) | 0.25              | 0.12<br>(-0.21, 0.45)   |
|                                 |                      |                      |                      |                      |                      |                      | 0.01 <sup>b</sup> | 0.001 <sup>b</sup>      |
| <b>Saturated fat</b>            |                      |                      |                      |                      |                      |                      |                   |                         |
| SNAP participants               | 4.86<br>(4.30, 5.43) | 4.61<br>(4.16, 5.07) | 5.35<br>(4.83, 5.87) | 5.35<br>(5.10, 5.59) | 5.35<br>(5.03, 5.67) | 5.09<br>(4.72, 5.45) | 0.23              | 0.19<br>(-0.45, 0.84)   |
| Income-eligible nonparticipants | 5.11<br>(4.70, 5.52) | 5.21<br>(4.96, 5.45) | 5.69<br>(5.32, 6.06) | 5.61<br>(5.34, 5.88) | 5.56<br>(5.20, 5.92) | 5.28<br>(5.00, 5.57) | 0.29              | 0.15<br>(-0.33, 0.63)   |
| Higher-Income Individuals       | 5.05<br>(4.80, 5.29) | 4.90<br>(4.72, 5.09) | 5.02<br>(4.81, 5.22) | 5.35<br>(5.18, 5.52) | 5.47<br>(5.21, 5.73) | 5.06<br>(4.87, 5.25) | 0.02              | 0.02<br>(-0.28, 0.32)   |
|                                 |                      |                      |                      |                      |                      |                      | 0.94 <sup>b</sup> | 0.72 <sup>b</sup>       |

Abbreviations: AHA, American Heart Association; SNAP: Supplemental Nutrition Assistance Program

<sup>a</sup> Survey-weighted mean scores were adjusted for age, sex, and race/ethnicity

<sup>b</sup> Survey-weighted P for interaction that assessed whether the trend in mean take or change in mean intake differed by SNAP participation status.

**eTable 5.** Adjusted Trends in Percentages of Having Poor, Intermediate, and Ideal Diet among U.S. Adults by SNAP Participation Status, 2003-2014<sup>a</sup>

| Percentage of Having Poor, Intermediate, and Ideal Diet | Survey-Weighted % (95% CI) |                      |                      |                      |                      |                      | P for trend                 | Change in % from 2003-2004 to 2013-2014   |
|---------------------------------------------------------|----------------------------|----------------------|----------------------|----------------------|----------------------|----------------------|-----------------------------|-------------------------------------------|
|                                                         | 2003-2004 (n=4066)         | 2005-2006 (n=4030)   | 2007-2008 (n=4654)   | 2009-2010 (n=4996)   | 2011-2012 (n=4288)   | 2013-2014 (n=4437)   |                             |                                           |
| <b>Poor diet</b>                                        |                            |                      |                      |                      |                      |                      |                             |                                           |
| SNAP participants                                       | 49.9<br>(47.0, 52.9)       | 49.6<br>(46.9, 52.3) | 49.3<br>(46.5, 52.0) | 49.1<br>(46.2, 51.9) | 48.7<br>(45.9, 51.4) | 48.3<br>(45.7, 51.0) | 0.39                        | -1.6<br>(-1.9, -1.4)                      |
| Income-eligible nonparticipants                         | 40.8<br>(38.0, 43.5)       | 40.4<br>(37.6, 43.2) | 40.1<br>(37.5, 42.7) | 39.9<br>(37.3, 42.5) | 39.6<br>(37.0, 42.1) | 39.2<br>(36.7, 41.7) | 0.17                        | -1.5<br>(-1.8, -1.3)                      |
| Higher-Income Individuals                               | 35.2<br>(33.4, 36.9)       | 34.8<br>(33.2, 36.5) | 34.5<br>(32.9, 36.2) | 34.3<br>(32.7, 35.9) | 34.0<br>(32.3, 35.7) | 33.7<br>(32.2, 35.2) | <0.001<br>0.70 <sup>b</sup> | -1.5<br>(-1.7, -1.2)<br>0.53 <sup>b</sup> |
| <b>Intermediate diet</b>                                |                            |                      |                      |                      |                      |                      |                             |                                           |
| SNAP participants                                       | 49.3<br>(46.4, 52.2)       | 49.6<br>(47.0, 52.3) | 49.9<br>(47.2, 52.7) | 50.1<br>(47.3, 52.9) | 50.5<br>(47.8, 53.2) | 50.8<br>(48.1, 53.5) | 0.53                        | 1.5<br>(1.3, 1.7)                         |
| Income-eligible nonparticipants                         | 58.0<br>(55.4, 60.6)       | 58.4<br>(55.7, 61.1) | 58.7<br>(56.2, 61.2) | 58.9<br>(56.4, 61.3) | 59.2<br>(56.7, 61.6) | 59.5<br>(57.1, 61.8) | 0.29                        | 1.4<br>(1.2, 1.7)                         |
| Higher-Income Individuals                               | 62.9<br>(61.2, 64.6)       | 63.2<br>(61.7, 64.8) | 63.5<br>(62.0, 65.1) | 63.7<br>(62.2, 65.2) | 63.9<br>(62.3, 65.6) | 64.2<br>(62.8, 65.7) | <0.001<br>0.80 <sup>b</sup> | 1.3<br>(1.0, 1.5)<br>0.64 <sup>b</sup>    |
| <b>Ideal diet</b>                                       |                            |                      |                      |                      |                      |                      |                             |                                           |
| SNAP participants                                       | 0.8<br>(0.4, 1.1)          | 0.8<br>(0.4, 1.2)    | 0.8<br>(0.4, 1.2)    | 0.8<br>(0.4, 1.2)    | 0.8<br>(0.4, 1.2)    | 0.8<br>(0.4, 1.2)    | 0.11                        | 0.0<br>(0.0, 0.1)                         |
| Income-eligible nonparticipants                         | 1.2<br>(0.7, 1.7)          | 1.2<br>(0.7, 1.7)    | 1.2<br>(0.7, 1.7)    | 1.2<br>(0.7, 1.7)    | 1.3<br>(0.8, 1.8)    | 1.3<br>(0.8, 1.8)    | 0.15                        | 0.1<br>(0.1, 0.2)                         |
| Higher-Income Individuals                               | 1.9<br>(1.6, 2.2)          | 1.9<br>(1.6, 2.3)    | 2.0<br>(1.6, 2.3)    | 2.0<br>(1.7, 2.3)    | 2.0<br>(1.7, 2.4)    | 2.1<br>(1.8, 2.4)    | 0.01<br>0.50 <sup>b</sup>   | 0.2<br>(0.2, 0.2)<br>0.44 <sup>b</sup>    |

Abbreviations: AHA, American Heart Association; SNAP: Supplemental Nutrition Assistance Program

<sup>a</sup> Survey-weighted mean scores were adjusted for age, sex, and race/ethnicity

<sup>b</sup> Survey-weighted P for interaction that assessed whether the trend in mean take or change in mean intake differed by SNAP participation status.



**eTable 6.** Adjusted Trends in Dietary Intake of Key Food Groups and Nutrients Among U.S. Adults by SNAP Participation Status, 1999-2014<sup>a</sup>

| Dietary Intake                           | Survey-Weighted Mean Intake (95% CI) |                      |                      |                      |                      |                      |                      |                      | P for trend       | Mean change from 1999-2000 to 2013-2014 (95% CI) |
|------------------------------------------|--------------------------------------|----------------------|----------------------|----------------------|----------------------|----------------------|----------------------|----------------------|-------------------|--------------------------------------------------|
|                                          | 1999-2000 (n=4232)                   | 2001-2002 (n=4744)   | 2003-2004 (n=4386)   | 2005-2006 (n=4473)   | 2007-2008 (n=5384)   | 2009-2010 (n=5710)   | 2011-2012 (n=4774)   | 2013-2014 (n=4993)   |                   |                                                  |
| <b>Total fruits, servings/d</b>          |                                      |                      |                      |                      |                      |                      |                      |                      |                   |                                                  |
| SNAP participants                        | 0.72<br>(0.54, 0.90)                 | 0.77<br>(0.60, 0.94) | 0.82<br>(0.68, 0.96) | 0.81<br>(0.63, 0.99) | 0.77<br>(0.63, 0.90) | 0.86<br>(0.79, 0.94) | 0.92<br>(0.81, 1.03) | 0.72<br>(0.61, 0.82) | 0.52              | 0<br>(-0.21, 0.21)                               |
| Income-eligible nonparticipants          | 0.98<br>(0.74, 1.21)                 | 0.83<br>(0.63, 1.03) | 0.88<br>(0.75, 1.02) | 0.96<br>(0.91, 1.02) | 0.86<br>(0.72, 1.00) | 0.94 (0.83, 1.05)    | 0.99<br>(0.84, 1.13) | 0.83<br>(0.69, 0.96) | 0.81              | -0.15<br>(-0.41, 0.11)                           |
| Higher-Income Individuals                | 1.04<br>(0.91, 1.17)                 | 1.15<br>(1.05, 1.26) | 1.04<br>(0.92, 1.15) | 1.00<br>(0.92, 1.08) | 1.02<br>(0.92, 1.12) | 1.11 (1.06, 1.16)    | 1.05<br>(0.96, 1.14) | 0.92<br>(0.86, 0.98) | 0.08              | -0.12<br>(-0.26, 0.02)                           |
|                                          |                                      |                      |                      |                      |                      |                      |                      |                      | 0.20 <sup>b</sup> | 0.44 <sup>b</sup>                                |
| <b>Whole fruits, servings/d</b>          |                                      |                      |                      |                      |                      |                      |                      |                      |                   |                                                  |
| SNAP participants                        | 0.40<br>(0.27, 0.54)                 | 0.45<br>(0.36, 0.54) | 0.43<br>(0.35, 0.52) | 0.42<br>(0.32, 0.52) | 0.50<br>(0.40, 0.61) | 0.53<br>(0.48, 0.59) | 0.59<br>(0.49, 0.69) | 0.49<br>(0.39, 0.59) | 0.03              | 0.07<br>(-0.1, 0.24)                             |
| Income-eligible nonparticipants          | 0.55<br>(0.40, 0.70)                 | 0.55<br>(0.40, 0.70) | 0.55<br>(0.45, 0.65) | 0.62<br>(0.58, 0.66) | 0.55<br>(0.44, 0.66) | 0.62<br>(0.52, 0.72) | 0.65<br>(0.58, 0.72) | 0.58<br>(0.49, 0.68) | 0.30              | 0.03<br>(-0.15, 0.2)                             |
| Higher-Income Individuals                | 0.63<br>(0.55, 0.72)                 | 0.69<br>(0.63, 0.74) | 0.65<br>(0.58, 0.73) | 0.66<br>(0.60, 0.72) | 0.73<br>(0.66, 0.80) | 0.81<br>(0.77, 0.84) | 0.78<br>(0.70, 0.85) | 0.70<br>(0.65, 0.76) | 0.001             | 0.07<br>(-0.03, 0.17)                            |
|                                          |                                      |                      |                      |                      |                      |                      |                      |                      | 0.70 <sup>b</sup> | 0.87 <sup>b</sup>                                |
| <b>100% fruit juices, servings/d</b>     |                                      |                      |                      |                      |                      |                      |                      |                      |                   |                                                  |
| SNAP participants                        | 0.33<br>(0.22, 0.43)                 | 0.42<br>(0.25, 0.58) | 0.39<br>(0.31, 0.47) | 0.63<br>(0.13, 1.13) | 0.31<br>(0.23, 0.38) | 0.35<br>(0.31, 0.39) | 0.37<br>(0.27, 0.47) | 0.25<br>(0.20, 0.30) | 0.05              | -0.07<br>(-0.18, 0.04)                           |
| Income-eligible nonparticipants          | 0.47<br>(0.32, 0.61)                 | 0.32<br>(0.25, 0.39) | 0.35<br>(0.29, 0.42) | 0.33<br>(0.3, 0.37)  | 0.35<br>(0.28, 0.42) | 0.36<br>(0.3, 0.42)  | 0.35<br>(0.22, 0.47) | 0.30<br>(0.23, 0.37) | 0.12              | -0.17<br>(-0.33, -0.01)                          |
| Higher-Income Individuals                | 0.43<br>(0.37, 0.49)                 | 0.44<br>(0.39, 0.49) | 0.39<br>(0.34, 0.45) | 0.36<br>(0.33, 0.39) | 0.30<br>(0.27, 0.34) | 0.33<br>(0.29, 0.36) | 0.27<br>(0.23, 0.31) | 0.22<br>(0.20, 0.24) | <0.001            | -0.21<br>(-0.27, -0.14)                          |
|                                          |                                      |                      |                      |                      |                      |                      |                      |                      | 0.10 <sup>b</sup> | 0.17 <sup>b</sup>                                |
| <b>Total vegetables, servings/d</b>      |                                      |                      |                      |                      |                      |                      |                      |                      |                   |                                                  |
| SNAP participants                        | 1.48<br>(1.22, 1.73)                 | 1.37<br>(1.22, 1.52) | 1.45<br>(1.31, 1.58) | 1.40<br>(1.25, 1.56) | 1.41<br>(1.25, 1.57) | 1.29<br>(1.23, 1.35) | 1.37<br>(1.29, 1.46) | 1.22<br>(1.11, 1.32) | 0.01              | -0.26<br>(-0.53, 0.01)                           |
| Income-eligible nonparticipants          | 1.41<br>(1.27, 1.56)                 | 1.45<br>(1.28, 1.62) | 1.52<br>(1.43, 1.61) | 1.52<br>(1.39, 1.65) | 1.43<br>(1.31, 1.55) | 1.5<br>(1.42, 1.58)  | 1.52<br>(1.41, 1.63) | 1.31<br>(1.19, 1.42) | 0.49              | -0.11<br>(-0.3, 0.07)                            |
| Higher-Income Individuals                | 1.70<br>(1.61, 1.79)                 | 1.64<br>(1.56, 1.72) | 1.67<br>(1.63, 1.72) | 1.66<br>(1.59, 1.72) | 1.66<br>(1.60, 1.72) | 1.68<br>(1.61, 1.75) | 1.70<br>(1.61, 1.80) | 1.55<br>(1.49, 1.62) | 0.21              | -0.15<br>(-0.26, -0.03)                          |
|                                          |                                      |                      |                      |                      |                      |                      |                      |                      | 0.20 <sup>b</sup> | 0.70 <sup>b</sup>                                |
| <b>Dark-green vegetables, servings/d</b> |                                      |                      |                      |                      |                      |                      |                      |                      |                   |                                                  |
| SNAP participants                        | 0.06<br>(0.04, 0.09)                 | 0.06<br>(0.04, 0.08) | 0.05<br>(0.03, 0.07) | 0.11<br>(0.07, 0.14) | 0.07<br>(0.06, 0.09) | 0.09<br>(0.08, 0.10) | 0.09<br>(0.06, 0.12) | 0.1<br>(0.06, 0.13)  | 0.02              | 0.03<br>(-0.01, 0.07)                            |
| Income-eligible nonparticipants          | 0.06<br>(0.04, 0.07)                 | 0.08<br>(0.05, 0.10) | 0.08<br>(0.06, 0.10) | 0.11<br>(0.08, 0.13) | 0.10<br>(0.06, 0.14) | 0.10<br>(0.06, 0.13) | 0.13<br>(0.08, 0.18) | 0.11<br>(0.08, 0.14) | <0.001            | 0.06<br>(0.03, 0.09)                             |
| Higher-Income Individuals                | 0.14<br>(0.10, 0.18)                 | 0.14<br>(0.11, 0.16) | 0.13<br>(0.11, 0.14) | 0.15<br>(0.13, 0.17) | 0.14<br>(0.12, 0.16) | 0.16<br>(0.14, 0.17) | 0.18<br>(0.14, 0.21) | 0.19<br>(0.16, 0.21) | 0.003             | 0.04<br>(0, 0.09)                                |
|                                          |                                      |                      |                      |                      |                      |                      |                      |                      | 0.76 <sup>b</sup> | 0.69 <sup>b</sup>                                |
| <b>Tomatoes, servings/d</b>              |                                      |                      |                      |                      |                      |                      |                      |                      |                   |                                                  |
| SNAP participants                        | 0.25<br>(0.19, 0.31)                 | 0.35<br>(0.28, 0.42) | 0.34<br>(0.28, 0.40) | 0.28<br>(0.24, 0.32) | 0.27<br>(0.24, 0.30) | 0.26<br>(0.23, 0.29) | 0.29<br>(0.26, 0.32) | 0.22<br>(0.20, 0.24) | 0.005             | -0.03<br>(-0.09, 0.04)                           |
| Income-eligible nonparticipants          | 0.27<br>(0.21, 0.33)                 | 0.33<br>(0.27, 0.40) | 0.34<br>(0.27, 0.41) | 0.33<br>(0.28, 0.37) | 0.26<br>(0.24, 0.29) | 0.28<br>(0.25, 0.32) | 0.31<br>(0.28, 0.33) | 0.27<br>(0.24, 0.30) | 0.27              | 0<br>(-0.07, 0.07)                               |
| Higher-Income Individuals                | 0.31<br>(0.28, 0.34)                 | 0.34<br>(0.31, 0.38) | 0.37<br>(0.33, 0.40) | 0.32<br>(0.30, 0.34) | 0.33<br>(0.31, 0.34) | 0.31<br>(0.27, 0.34) | 0.31<br>(0.29, 0.34) | 0.28<br>(0.26, 0.29) | 0.002             | -0.04<br>(-0.07, 0)                              |
|                                          |                                      |                      |                      |                      |                      |                      |                      |                      | 0.39 <sup>b</sup> | 0.65 <sup>b</sup>                                |

**Other red/orange vegetables, servings/d**

|                 |              |              |              |              |              |              |              |              |                   |                   |
|-----------------|--------------|--------------|--------------|--------------|--------------|--------------|--------------|--------------|-------------------|-------------------|
| SNAP            | 0.06         | 0.07         | 0.05         | 0.06         | 0.05         | 0.07         | 0.07         | 0.08         |                   | 0.02              |
| participants    | (0.04, 0.09) | (0.05, 0.09) | (0.03, 0.07) | (0.04, 0.08) | (0.04, 0.07) | (0.06, 0.08) | (0.05, 0.10) | (0.06, 0.10) | 0.10              | (-0.02, 0.05)     |
| Income-eligible | 0.07         | 0.07         | 0.08         | 0.08         | 0.09         | 0.09         | 0.08         | 0.08         |                   | 0.01              |
| nonparticipants | (0.05, 0.09) | (0.06, 0.09) | (0.06, 0.10) | (0.07, 0.09) | (0.05, 0.13) | (0.08, 0.10) | (0.06, 0.11) | (0.06, 0.10) | 0.15              | (-0.01, 0.04)     |
| Higher-Income   | 0.09         | 0.09         | 0.08         | 0.09         | 0.09         | 0.11         | 0.12         | 0.11         |                   | 0.02              |
| Individuals     | (0.08, 0.11) | (0.07, 0.11) | (0.07, 0.08) | (0.08, 0.10) | (0.07, 0.10) | (0.10, 0.12) | (0.11, 0.14) | (0.09, 0.12) | <0.001            | (-0.01, 0.04)     |
|                 |              |              |              |              |              |              |              |              | 0.48 <sup>b</sup> | 0.97 <sup>b</sup> |

**White potatoes, servings/d**

|                 |              |              |              |              |              |              |              |              |                   |                    |
|-----------------|--------------|--------------|--------------|--------------|--------------|--------------|--------------|--------------|-------------------|--------------------|
| SNAP            | 0.49         | 0.32         | 0.47         | 0.38         | 0.40         | 0.36         | 0.34         | 0.33         |                   | -0.16              |
| participants    | (0.40, 0.58) | (0.23, 0.40) | (0.41, 0.52) | (0.31, 0.44) | (0.36, 0.45) | (0.33, 0.38) | (0.29, 0.39) | (0.30, 0.36) | 0.002             | (-0.25, -0.06)     |
| Income-eligible | 0.38         | 0.35         | 0.42         | 0.36         | 0.37         | 0.37         | 0.37         | 0.32         |                   | -0.06              |
| nonparticipants | (0.29, 0.47) | (0.27, 0.43) | (0.36, 0.49) | (0.30, 0.42) | (0.31, 0.44) | (0.31, 0.42) | (0.30, 0.45) | (0.27, 0.36) | 0.32              | (-0.16, 0.04)      |
| Higher-Income   | 0.39         | 0.37         | 0.37         | 0.35         | 0.37         | 0.36         | 0.32         | 0.32         |                   | -0.07              |
| Individuals     | (0.34, 0.43) | (0.35, 0.39) | (0.34, 0.41) | (0.32, 0.39) | (0.33, 0.40) | (0.34, 0.38) | (0.29, 0.34) | (0.29, 0.35) | 0.001             | (-0.12, -0.01)     |
|                 |              |              |              |              |              |              |              |              | 0.12 <sup>b</sup> | 0.049 <sup>b</sup> |

**Other starchy vegetables, servings/d**

|                 |              |              |              |              |              |              |              |              |                   |                   |
|-----------------|--------------|--------------|--------------|--------------|--------------|--------------|--------------|--------------|-------------------|-------------------|
| SNAP            | 0.09         | 0.09         | 0.08         | 0.08         | 0.09         | 0.08         | 0.08         | 0.07         |                   | -0.02             |
| participants    | (0.05, 0.13) | (0.04, 0.15) | (0.05, 0.11) | (0.06, 0.11) | (0.07, 0.10) | (0.07, 0.10) | (0.04, 0.12) | (0.05, 0.09) | 0.25              | (-0.07, 0.02)     |
| Income-eligible | 0.10         | 0.10         | 0.07         | 0.08         | 0.09         | 0.09         | 0.08         | 0.06         |                   | -0.04             |
| nonparticipants | (0.06, 0.13) | (0.08, 0.13) | (0.05, 0.09) | (0.07, 0.10) | (0.07, 0.10) | (0.07, 0.11) | (0.05, 0.11) | (0.04, 0.08) | 0.07              | (-0.08, 0)        |
| Higher-Income   | 0.10         | 0.10         | 0.08         | 0.09         | 0.09         | 0.09         | 0.08         | 0.07         |                   | -0.03             |
| Individuals     | (0.08, 0.11) | (0.09, 0.11) | (0.07, 0.09) | (0.08, 0.11) | (0.08, 0.11) | (0.07, 0.10) | (0.07, 0.09) | (0.06, 0.08) | <0.001            | (-0.04, -0.01)    |
|                 |              |              |              |              |              |              |              |              | 0.89 <sup>b</sup> | 0.88 <sup>b</sup> |

**Vegetables, excluding potatoes/starchy, servings/d**

|                 |              |              |              |              |              |              |              |                   |                   |                   |
|-----------------|--------------|--------------|--------------|--------------|--------------|--------------|--------------|-------------------|-------------------|-------------------|
| SNAP            | 0.89         | 0.96         | 0.90         | 0.94         | 0.92         | 0.85         | 0.95         | 0.82 (0.73, 0.91) |                   | -0.08             |
| participants    | (0.67, 1.11) | (0.81, 1.11) | (0.80, 1.00) | (0.81, 1.08) | (0.80, 1.04) | (0.77, 0.93) | (0.88, 1.03) |                   | 0.32              | (-0.31, 0.16)     |
| Income-eligible | 0.94         | 0.99         | 1.02         | 1.08         | 0.97         | 1.04         | 1.07         | 0.93 (0.83, 1.03) |                   | -0.02             |
| nonparticipants | (0.81, 1.07) | (0.84, 1.14) | (0.91, 1.13) | (0.97, 1.18) | (0.85, 1.09) | (0.97, 1.11) | (0.95, 1.19) |                   | 0.80              | (-0.17, 0.14)     |
| Higher-Income   | 1.22         | 1.17         | 1.21         | 1.21         | 1.20         | 1.23         | 1.31         | 1.16 (1.09, 1.24) |                   | -0.05             |
| Individuals     | (1.10, 1.33) | (1.09, 1.25) | (1.16, 1.27) | (1.13, 1.28) | (1.12, 1.27) | (1.16, 1.30) | (1.20, 1.41) |                   | 0.57              | (-0.19, 0.08)     |
|                 |              |              |              |              |              |              |              |                   | 0.48 <sup>b</sup> | 0.90 <sup>b</sup> |

**Total grains, servings/d**

|                 |              |              |              |              |              |              |              |              |                   |                   |
|-----------------|--------------|--------------|--------------|--------------|--------------|--------------|--------------|--------------|-------------------|-------------------|
| SNAP            | 5.46         | 6.48         | 6.12         | 5.93         | 5.98         | 6.24         | 6.31         | 5.47         |                   | -0.03             |
| participants    | (4.97, 5.95) | (5.82, 7.13) | (5.85, 6.39) | (5.63, 6.23) | (5.75, 6.22) | (6.03, 6.45) | (5.97, 6.64) | (5.15, 5.78) | 0.29              | (-0.59, 0.53)     |
| Income-eligible | 6.10         | 6.71         | 6.39         | 6.16         | 6.02         | 6.37         | 6.60         | 5.87         |                   | -0.27             |
| nonparticipants | (5.74, 6.47) | (6.28, 7.13) | (6.08, 6.70) | (5.82, 6.49) | (5.72, 6.31) | (6.14, 6.61) | (6.11, 7.09) | (5.56, 6.18) | 0.27              | (-0.76, 0.21)     |
| Higher-Income   | 6.08         | 6.32         | 6.27         | 6.18         | 6.10         | 6.15         | 6.14         | 5.91         |                   | -0.15             |
| Individuals     | (5.86, 6.30) | (6.18, 6.47) | (6.09, 6.44) | (6.06, 6.29) | (5.98, 6.21) | (6.01, 6.29) | (5.98, 6.31) | (5.74, 6.09) | 0.04              | (-0.43, 0.12)     |
|                 |              |              |              |              |              |              |              |              | 0.99 <sup>b</sup> | 0.81 <sup>b</sup> |

**Whole grains, servings/d**

|                 |              |              |              |              |              |              |              |              |                   |                   |
|-----------------|--------------|--------------|--------------|--------------|--------------|--------------|--------------|--------------|-------------------|-------------------|
| SNAP            | 0.48         | 0.50         | 0.54         | 0.56         | 0.54         | 0.70         | 0.83         | 0.72         |                   | 0.24              |
| participants    | (0.32, 0.63) | (0.33, 0.67) | (0.41, 0.67) | (0.43, 0.69) | (0.50, 0.58) | (0.61, 0.78) | (0.71, 0.96) | (0.64, 0.8)  | <0.001            | (0.06, 0.42)      |
| Income-eligible | 0.48         | 0.62         | 0.59         | 0.69         | 0.64         | 0.84         | 0.88         | 0.79         |                   | 0.33              |
| nonparticipants | (0.40, 0.57) | (0.48, 0.75) | (0.50, 0.68) | (0.55, 0.84) | (0.51, 0.76) | (0.73, 0.95) | (0.79, 0.97) | (0.65, 0.94) | <0.001            | (0.16, 0.49)      |
| Higher-Income   | 0.62         | 0.75         | 0.69         | 0.81         | 0.79         | 0.92         | 1.05         | 0.96         |                   | 0.34              |
| Individuals     | (0.55, 0.69) | (0.68, 0.82) | (0.65, 0.74) | (0.74, 0.87) | (0.70, 0.88) | (0.86, 0.99) | (0.96, 1.14) | (0.91, 1.01) | <0.001            | (0.25, 0.42)      |
|                 |              |              |              |              |              |              |              |              | 0.83 <sup>b</sup> | 0.62 <sup>b</sup> |

**Refined grains, servings/d**

|                 |              |              |              |              |              |              |              |              |       |                |
|-----------------|--------------|--------------|--------------|--------------|--------------|--------------|--------------|--------------|-------|----------------|
| SNAP            | 4.98         | 5.97         | 5.58         | 5.37         | 5.45         | 5.54         | 5.48         | 4.74         |       | -0.26          |
| participants    | (4.49, 5.47) | (5.27, 6.68) | (5.26, 5.9)  | (5.10, 5.64) | (5.21, 5.68) | (5.36, 5.72) | (5.18, 5.78) | (4.46, 5.03) | 0.01  | (-0.82, 0.29)  |
| Income-eligible | 5.62         | 6.09         | 5.80         | 5.46         | 5.38         | 5.54         | 5.72         | 5.08         |       | -0.6           |
| nonparticipants | (5.28, 5.95) | (5.67, 6.51) | (5.46, 6.14) | (5.13, 5.80) | (5.12, 5.64) | (5.28, 5.79) | (5.27, 6.17) | (4.8, 5.35)  | 0.003 | (-1.04, -0.16) |

|                                          |                      |                      |                      |                      |                      |                      |                      |                      |                               |                                              |
|------------------------------------------|----------------------|----------------------|----------------------|----------------------|----------------------|----------------------|----------------------|----------------------|-------------------------------|----------------------------------------------|
| Higher-Income Individuals                | 5.46<br>(5.26, 5.65) | 5.58<br>(5.41, 5.74) | 5.57<br>(5.41, 5.73) | 5.37<br>(5.23, 5.50) | 5.31<br>(5.21, 5.40) | 5.23<br>(5.08, 5.37) | 5.10<br>(4.96, 5.24) | 4.96<br>(4.80, 5.11) | <0.001<br>0.94 <sup>b</sup>   | -0.49<br>(-0.74, -0.24)<br>0.68 <sup>b</sup> |
| <b>Nuts and seeds, servings/d</b>        |                      |                      |                      |                      |                      |                      |                      |                      |                               |                                              |
| SNAP participants                        | 0.30<br>(0.19, 0.41) | 0.41<br>(0.05, 0.78) | 0.40<br>(0.30, 0.51) | 0.41<br>(0.34, 0.48) | 0.41<br>(0.26, 0.56) | 0.40<br>(0.32, 0.47) | 0.39<br>(0.29, 0.5)  | 0.40<br>(0.28, 0.51) | 0.57                          | 0.11<br>(-0.05, 0.26)<br>-0.02               |
| Income-eligible nonparticipants          | 0.54<br>(0.38, 0.69) | 0.49<br>(0.27, 0.7)  | 0.53<br>(0.44, 0.63) | 0.51<br>(0.39, 0.63) | 0.50<br>(0.30, 0.70) | 0.50<br>(0.42, 0.59) | 0.43<br>(0.28, 0.59) | 0.49<br>(0.41, 0.57) | 0.54                          | -0.02<br>(-0.19, 0.14)<br>0.34               |
| Higher-Income Individuals                | 0.46<br>(0.40, 0.53) | 0.50<br>(0.42, 0.58) | 0.56<br>(0.49, 0.63) | 0.61<br>(0.55, 0.67) | 0.60<br>(0.53, 0.66) | 0.70<br>(0.63, 0.76) | 0.83<br>(0.74, 0.92) | 0.80<br>(0.74, 0.87) | <0.001<br><0.001 <sup>b</sup> | 0.34<br>(0.25, 0.43)<br>0.000 <sup>b</sup>   |
| <b>Legumes, servings/d</b>               |                      |                      |                      |                      |                      |                      |                      |                      |                               |                                              |
| SNAP participants                        | 0.12<br>(0.05, 0.18) | 0.17<br>(0.08, 0.26) | 0.12<br>(0.09, 0.14) | 0.08<br>(0.05, 0.11) | 0.09<br>(0.06, 0.11) | 0.11<br>(0.09, 0.14) | 0.11<br>(0.08, 0.15) | 0.09<br>(0.08, 0.10) | 0.17                          | -0.03<br>(-0.09, 0.04)<br>-0.01              |
| Income-eligible nonparticipants          | 0.11<br>(0.08, 0.14) | 0.11<br>(0.08, 0.13) | 0.10<br>(0.05, 0.14) | 0.11<br>(0.08, 0.13) | 0.12<br>(0.08, 0.17) | 0.10<br>(0.07, 0.13) | 0.14<br>(0.09, 0.19) | 0.11<br>(0.09, 0.13) | 0.51                          | -0.01<br>(-0.04, 0.03)<br>-0.01              |
| Higher-Income Individuals                | 0.10<br>(0.08, 0.12) | 0.09<br>(0.08, 0.11) | 0.09<br>(0.08, 0.10) | 0.09<br>(0.08, 0.11) | 0.10<br>(0.08, 0.11) | 0.09<br>(0.08, 0.1)  | 0.10<br>(0.09, 0.12) | 0.09<br>(0.08, 0.10) | 0.84<br>0.31 <sup>b</sup>     | -0.01<br>(-0.03, 0.01)<br>0.85 <sup>b</sup>  |
| <b>Total meat, serving/d</b>             |                      |                      |                      |                      |                      |                      |                      |                      |                               |                                              |
| SNAP participants                        | 1.26<br>(1.05, 1.47) | 1.10<br>(0.99, 1.20) | 1.10<br>(1.00, 1.19) | 1.23<br>(1.12, 1.33) | 1.22<br>(1.12, 1.31) | 1.19<br>(1.13, 1.26) | 1.10<br>(1.03, 1.17) | 1.14<br>(1.07, 1.21) | 0.56                          | -0.11<br>(-0.34, 0.11)<br>-0.01              |
| Income-eligible nonparticipants          | 1.04<br>(0.91, 1.17) | 1.11<br>(1.00, 1.21) | 1.04<br>(0.90, 1.18) | 1.20<br>(1.10, 1.31) | 1.12<br>(1.04, 1.20) | 1.18<br>(1.10, 1.26) | 1.15<br>(1.04, 1.25) | 1.04<br>(0.97, 1.11) | 0.51                          | -0.01<br>(-0.15, 0.12)<br>-0.02              |
| Higher-Income Individuals                | 1.14<br>(1.08, 1.20) | 1.10<br>(1.07, 1.14) | 1.18<br>(1.14, 1.21) | 1.19<br>(1.15, 1.23) | 1.20<br>(1.17, 1.23) | 1.19<br>(1.14, 1.25) | 1.14<br>(1.08, 1.20) | 1.12<br>(1.08, 1.16) | 0.64<br>0.50 <sup>b</sup>     | -0.02<br>(-0.09, 0.06)<br>0.59 <sup>b</sup>  |
| <b>Processed meats, servings/d</b>       |                      |                      |                      |                      |                      |                      |                      |                      |                               |                                              |
| SNAP participants                        | 0.36<br>(0.26, 0.46) | 0.24<br>(0.19, 0.29) | 0.30<br>(0.26, 0.33) | 0.33<br>(0.26, 0.40) | 0.33<br>(0.28, 0.39) | 0.33<br>(0.29, 0.38) | 0.30<br>(0.25, 0.36) | 0.34<br>(0.26, 0.41) | 0.54                          | -0.02<br>(-0.15, 0.1)<br>0.07                |
| Income-eligible nonparticipants          | 0.23<br>(0.16, 0.29) | 0.29<br>(0.24, 0.33) | 0.29<br>(0.24, 0.33) | 0.27<br>(0.23, 0.32) | 0.30<br>(0.26, 0.33) | 0.32<br>(0.27, 0.36) | 0.28<br>(0.26, 0.31) | 0.29<br>(0.26, 0.32) | 0.09                          | 0.07<br>(0, 0.13)<br>-0.02                   |
| Higher-Income Individuals                | 0.29<br>(0.25, 0.33) | 0.30<br>(0.28, 0.33) | 0.30<br>(0.27, 0.32) | 0.31<br>(0.28, 0.33) | 0.29<br>(0.27, 0.31) | 0.30<br>(0.28, 0.32) | 0.30<br>(0.27, 0.33) | 0.27<br>(0.24, 0.30) | 0.53<br>0.12 <sup>b</sup>     | -0.02<br>(-0.06, 0.03)<br>0.13 <sup>b</sup>  |
| <b>Unprocessed red meats, servings/d</b> |                      |                      |                      |                      |                      |                      |                      |                      |                               |                                              |
| SNAP participants                        | 0.55<br>(0.46, 0.63) | 0.51<br>(0.43, 0.58) | 0.48<br>(0.41, 0.54) | 0.58<br>(0.48, 0.68) | 0.53<br>(0.48, 0.58) | 0.49<br>(0.46, 0.51) | 0.46<br>(0.41, 0.51) | 0.41<br>(0.37, 0.45) | 0.005                         | -0.12<br>(-0.21, -0.03)<br>-0.13             |
| Income-eligible nonparticipants          | 0.48<br>(0.41, 0.55) | 0.48<br>(0.41, 0.56) | 0.43<br>(0.38, 0.49) | 0.50<br>(0.45, 0.56) | 0.42<br>(0.37, 0.47) | 0.45<br>(0.40, 0.50) | 0.47<br>(0.36, 0.57) | 0.36<br>(0.33, 0.40) | 0.02                          | -0.13<br>(-0.2, -0.05)<br>-0.06              |
| Higher-Income Individuals                | 0.48<br>(0.43, 0.53) | 0.43<br>(0.39, 0.46) | 0.48<br>(0.44, 0.51) | 0.47<br>(0.44, 0.5)  | 0.46<br>(0.42, 0.49) | 0.45<br>(0.41, 0.49) | 0.44<br>(0.39, 0.49) | 0.42<br>(0.40, 0.44) | 0.07<br>0.16 <sup>b</sup>     | -0.06<br>(-0.11, -0.01)<br>0.37 <sup>b</sup> |
| <b>Poultry, servings/d</b>               |                      |                      |                      |                      |                      |                      |                      |                      |                               |                                              |
| SNAP participants                        | 0.36<br>(0.20, 0.52) | 0.35<br>(0.25, 0.44) | 0.33<br>(0.25, 0.40) | 0.32<br>(0.25, 0.38) | 0.35<br>(0.29, 0.41) | 0.37<br>(0.31, 0.44) | 0.34<br>(0.30, 0.38) | 0.39<br>(0.34, 0.44) | 0.46                          | 0.03<br>(-0.14, 0.2)<br>0.05                 |
| Income-eligible nonparticipants          | 0.33<br>(0.26, 0.41) | 0.34<br>(0.29, 0.39) | 0.31<br>(0.25, 0.37) | 0.42<br>(0.35, 0.50) | 0.40<br>(0.35, 0.46) | 0.41<br>(0.38, 0.45) | 0.39<br>(0.36, 0.43) | 0.38<br>(0.33, 0.44) | 0.01                          | 0.05<br>(-0.04, 0.14)<br>0.06                |
| Higher-Income Individuals                | 0.37<br>(0.33, 0.42) | 0.37<br>(0.34, 0.40) | 0.40<br>(0.37, 0.44) | 0.42<br>(0.39, 0.44) | 0.45<br>(0.42, 0.49) | 0.44<br>(0.40, 0.48) | 0.40<br>(0.36, 0.44) | 0.43<br>(0.40, 0.46) | 0.005<br>0.81 <sup>b</sup>    | 0.06<br>(0, 0.12)<br>0.95 <sup>b</sup>       |
| <b>Fish and shellfish, servings/d</b>    |                      |                      |                      |                      |                      |                      |                      |                      |                               |                                              |

|                                              |                      |                      |                      |                      |                      |                      |                      |                      |                              |                                             |
|----------------------------------------------|----------------------|----------------------|----------------------|----------------------|----------------------|----------------------|----------------------|----------------------|------------------------------|---------------------------------------------|
| SNAP participants                            | 0.17<br>(0.07, 0.26) | 0.10<br>(0.05, 0.15) | 0.12<br>(0.08, 0.16) | 0.11<br>(0.08, 0.15) | 0.12<br>(0.09, 0.16) | 0.14<br>(0.12, 0.17) | 0.16<br>(0.11, 0.21) | 0.14<br>(0.08, 0.2)  | 0.35                         | -0.02<br>(-0.13, 0.09)                      |
| Income-eligible nonparticipants              | 0.18<br>(0.1, 0.26)  | 0.11<br>(0.09, 0.13) | 0.12<br>(0.09, 0.15) | 0.13<br>(0.08, 0.18) | 0.15<br>(0.11, 0.19) | 0.17<br>(0.12, 0.22) | 0.16<br>(0.11, 0.21) | 0.13<br>(0.10, 0.15) | 0.99                         | -0.05<br>(-0.13, 0.02)                      |
| Higher-Income Individuals                    | 0.16<br>(0.13, 0.18) | 0.16<br>(0.13, 0.19) | 0.16<br>(0.13, 0.18) | 0.19<br>(0.16, 0.22) | 0.16<br>(0.14, 0.18) | 0.19<br>(0.16, 0.22) | 0.18<br>(0.14, 0.21) | 0.19<br>(0.15, 0.23) | 0.08<br>0.64 <sup>b</sup>    | 0.03 (-0.01, 0.08)<br>0.09 <sup>b</sup>     |
| <b>Eggs, servings/d</b>                      |                      |                      |                      |                      |                      |                      |                      |                      |                              |                                             |
| SNAP participants                            | 0.66<br>(0.46, 0.85) | 0.42<br>(0.29, 0.54) | 0.49<br>(0.41, 0.57) | 0.48<br>(0.38, 0.57) | 0.56<br>(0.49, 0.62) | 0.52<br>(0.44, 0.61) | 0.50<br>(0.42, 0.57) | 0.43<br>(0.39, 0.48) | 0.11                         | -0.23<br>(-0.43, -0.03)                     |
| Income-eligible nonparticipants              | 0.44<br>(0.37, 0.52) | 0.47<br>(0.39, 0.55) | 0.51<br>(0.41, 0.61) | 0.50<br>(0.44, 0.56) | 0.50<br>(0.46, 0.54) | 0.51<br>(0.41, 0.61) | 0.45<br>(0.37, 0.53) | 0.50<br>(0.41, 0.59) | 0.77                         | 0.04<br>(-0.07, 0.16)                       |
| Higher-Income Individuals                    | 0.43<br>(0.39, 0.47) | 0.44<br>(0.41, 0.47) | 0.47<br>(0.42, 0.51) | 0.49<br>(0.46, 0.52) | 0.50<br>(0.47, 0.53) | 0.49<br>(0.45, 0.52) | 0.51<br>(0.47, 0.55) | 0.54<br>(0.49, 0.58) | <0.001<br>0.009 <sup>b</sup> | 0.1<br>(0.05, 0.16)<br>0.03 <sup>b</sup>    |
| <b>Total dairy, servings/d</b>               |                      |                      |                      |                      |                      |                      |                      |                      |                              |                                             |
| SNAP participants                            | 1.40<br>(1.03, 1.76) | 1.26<br>(1.13, 1.39) | 1.50<br>(1.33, 1.67) | 1.54<br>(1.3, 1.77)  | 1.33<br>(1.24, 1.42) | 1.63<br>(1.51, 1.76) | 1.67<br>(1.55, 1.78) | 1.49<br>(1.38, 1.59) | 0.06                         | 0.08<br>(-0.29, 0.44)                       |
| Income-eligible nonparticipants              | 1.35<br>(1.21, 1.49) | 1.37<br>(1.18, 1.55) | 1.40<br>(1.29, 1.50) | 1.53<br>(1.39, 1.68) | 1.47<br>(1.3, 1.65)  | 1.59<br>(1.48, 1.69) | 1.55<br>(1.36, 1.74) | 1.49<br>(1.35, 1.62) | 0.02                         | 0.14<br>(-0.05, 0.32)                       |
| Higher-Income Individuals                    | 1.52<br>(1.43, 1.61) | 1.50<br>(1.43, 1.57) | 1.45<br>(1.38, 1.52) | 1.53<br>(1.47, 1.59) | 1.52<br>(1.45, 1.59) | 1.63<br>(1.58, 1.69) | 1.49<br>(1.45, 1.54) | 1.48<br>(1.42, 1.53) | 0.64<br>0.03 <sup>b</sup>    | -0.04<br>(-0.15, 0.06)<br>0.24 <sup>b</sup> |
| <b>Milk, servings/d</b>                      |                      |                      |                      |                      |                      |                      |                      |                      |                              |                                             |
| SNAP participants                            | 0.98<br>(0.73, 1.22) | 0.77<br>(0.66, 0.87) | 0.96<br>(0.79, 1.12) | 0.93<br>(0.74, 1.12) | 0.76<br>(0.70, 0.82) | 0.95<br>(0.82, 1.08) | 0.81<br>(0.68, 0.94) | 0.67<br>(0.59, 0.76) | 0.005                        | -0.3<br>(-0.55, -0.06)                      |
| Income-eligible nonparticipants              | 0.89<br>(0.74, 1.04) | 0.88<br>(0.72, 1.04) | 0.83<br>(0.70, 0.95) | 0.93<br>(0.79, 1.08) | 0.83<br>(0.73, 0.93) | 0.85<br>(0.73, 0.96) | 0.72<br>(0.61, 0.83) | 0.61<br>(0.51, 0.71) | 0.001                        | -0.28<br>(-0.46, -0.11)                     |
| Higher-Income Individuals                    | 0.92<br>(0.84, 1.00) | 0.92<br>(0.85, 0.98) | 0.82<br>(0.77, 0.87) | 0.86<br>(0.78, 0.93) | 0.80<br>(0.74, 0.87) | 0.82<br>(0.78, 0.86) | 0.70<br>(0.65, 0.74) | 0.63<br>(0.59, 0.66) | <0.001<br>0.77 <sup>b</sup>  | -0.29<br>(-0.37, -0.2)<br>0.99 <sup>b</sup> |
| <b>Cheese, servings/d</b>                    |                      |                      |                      |                      |                      |                      |                      |                      |                              |                                             |
| SNAP participants                            | 0.42<br>(0.24, 0.59) | 0.48<br>(0.36, 0.59) | 0.53<br>(0.46, 0.59) | 0.58<br>(0.45, 0.7)  | 0.50<br>(0.43, 0.57) | 0.63<br>(0.57, 0.7)  | 0.79<br>(0.7, 0.89)  | 0.71<br>(0.65, 0.77) | <0.001                       | 0.29<br>(0.11, 0.47)                        |
| Income-eligible nonparticipants              | 0.42<br>(0.34, 0.51) | 0.44<br>(0.36, 0.52) | 0.53<br>(0.43, 0.63) | 0.52<br>(0.47, 0.57) | 0.54<br>(0.46, 0.62) | 0.65<br>(0.60, 0.69) | 0.74<br>(0.63, 0.85) | 0.75<br>(0.66, 0.83) | <0.001                       | 0.32<br>(0.2, 0.44)                         |
| Higher-Income Individuals                    | 0.56<br>(0.52, 0.61) | 0.54<br>(0.50, 0.57) | 0.59<br>(0.55, 0.64) | 0.60<br>(0.56, 0.64) | 0.63<br>(0.59, 0.67) | 0.70<br>(0.66, 0.74) | 0.70<br>(0.67, 0.73) | 0.72<br>(0.68, 0.76) | <0.001<br>0.001 <sup>b</sup> | 0.16<br>(0.1, 0.22)<br>0.04 <sup>b</sup>    |
| <b>Yogurt, servings/d</b>                    |                      |                      |                      |                      |                      |                      |                      |                      |                              |                                             |
| SNAP participants                            | 0.02<br>(0.00, 0.03) | 0.02<br>(0.01, 0.02) | 0.03<br>(0.02, 0.05) | 0.02<br>(0.01, 0.03) | 0.03<br>(0.01, 0.04) | 0.03<br>(0.02, 0.05) | 0.04<br>(0.03, 0.05) | 0.04<br>(0.02, 0.06) | 0.005                        | 0.02<br>(0, 0.05)                           |
| Income-eligible nonparticipants              | 0.03<br>(0.01, 0.05) | 0.03<br>(0.01, 0.06) | 0.02<br>(0.01, 0.03) | 0.05<br>(0.03, 0.08) | 0.04<br>(0.01, 0.07) | 0.04<br>(0.03, 0.05) | 0.06<br>(0.04, 0.07) | 0.08<br>(0.05, 0.11) | 0.0002                       | 0.05<br>(0.02, 0.09)                        |
| Higher-Income Individuals                    | 0.04<br>(0.02, 0.06) | 0.06<br>(0.05, 0.07) | 0.04<br>(0.03, 0.05) | 0.05<br>(0.04, 0.06) | 0.06<br>(0.05, 0.07) | 0.07<br>(0.07, 0.08) | 0.07<br>(0.06, 0.09) | 0.08<br>(0.07, 0.09) | <0.001<br>0.30 <sup>p</sup>  | 0.04<br>(0.02, 0.06)<br>0.34 <sup>p</sup>   |
| <b>Sugar sweetened beverages, servings/d</b> |                      |                      |                      |                      |                      |                      |                      |                      |                              |                                             |
| SNAP participants                            | 2.24<br>(1.65, 2.84) | 2.16 (1.58, 2.73)    | 2.06 (1.72, 2.41)    | 1.94 (1.55, 2.33)    | 2.39 (1.91, 2.86)    | 2.06 (1.88, 2.23)    | 1.68 (1.43, 1.93)    | 1.76 (1.43, 2.09)    | 0.04                         | -0.43<br>(-1.09, 0.24)                      |
| Income-eligible nonparticipants              | 2.17<br>(1.71, 2.63) | 1.99 (1.71, 2.27)    | 1.97 (1.76, 2.17)    | 1.86 (1.6, 2.12)     | 1.72 (1.36, 2.09)    | 1.54 (1.34, 1.73)    | 1.52 (1.36, 1.69)    | 1.13 (0.93, 1.32)    | <0.001                       | -1.06<br>(-1.54, -0.57)                     |
| Higher-Income Individuals                    | 1.56<br>(1.41, 1.70) | 1.48 (1.3, 1.66)     | 1.48 (1.32, 1.65)    | 1.29 (1.17, 1.42)    | 1.29 (1.14, 1.44)    | 1.12 (1.02, 1.22)    | 1.16 (0.98, 1.34)    | 0.88 (0.8, 0.97)     | <0.001                       | -0.68<br>(-0.84, -0.52)                     |

|                                                    |              |              |              |              |              |                   |              |              |                    |                   |
|----------------------------------------------------|--------------|--------------|--------------|--------------|--------------|-------------------|--------------|--------------|--------------------|-------------------|
|                                                    |              |              |              |              |              |                   |              |              | 0.11 <sup>b</sup>  | 0.18 <sup>b</sup> |
| <b>Added sugars, tsp equivalents/d, servings/d</b> |              |              |              |              |              |                   |              |              |                    |                   |
| SNAP                                               | 23.5         | 25.0         | 20.8         | 19.0         | 22.3         | 20.8              | 18.6         | 19.6         |                    | -3.7              |
| participants                                       | (20.5, 26.5) | (19.8, 30.2) | (18.7, 23.0) | (17.0, 21.0) | (19.5, 25.1) | (19.8, 21.8)      | (17.1, 20.2) | (17.8, 21.3) | 0.002              | (-7.1, -0.4)      |
| Income-eligible                                    | 24.2         | 21.1         | 20.7         | 19.7         | 20.3         | 17.8              | 17.6         | 16.1         |                    | -8.0              |
| nonparticipants                                    | (21.5, 26.9) | (19.3, 22.9) | (19.1, 22.3) | (17.8, 21.6) | (17.8, 22.7) | (16.5, 19.0)      | (16.2, 19.0) | (14.8, 17.5) | <0.001             | (-10.9, -5.2)     |
| Higher-Income                                      | 19.6         | 18.7         | 16.9         | 16.1         | 16.4         | 15.5              | 15.7         | 14.1         |                    | -5.6              |
| Individuals                                        | (18.4, 20.8) | (17.5, 19.8) | (16.2, 17.6) | (15.4, 16.8) | (15.5, 17.4) | (15.0, 16.1)      | (14.9, 16.6) | (13.7, 14.5) | <0.001             | (-6.8, -4.3)      |
|                                                    |              |              |              |              |              |                   |              |              | 0.12 <sup>b</sup>  | 0.08 <sup>b</sup> |
| <b>Total fat, % of energy</b>                      |              |              |              |              |              |                   |              |              |                    |                   |
| SNAP                                               | 32.2         | 32.8         | 33.7         | 34.0         | 33.5         | 32.5              | 33.3         | 33.6         |                    | 1.5               |
| participants                                       | (30.6, 33.7) | (30.9, 34.7) | (32.6, 34.9) | (33.0, 35.0) | (32.3, 34.6) | (31.9, 33.0)      | (32.6, 33.9) | (32.9, 34.2) | 0.31               | (-0.2, 3.2)       |
| Income-eligible                                    | 32.3         | 33.4         | 34.2         | 32.9         | 32.6         | 32.2              | 33.2         | 34.1         |                    | 1.9               |
| nonparticipants                                    | (31.2, 33.4) | (32.5, 34.4) | (33.5, 34.9) | (32.4, 33.5) | (31.5, 33.8) | (31.5, 32.9)      | (32.3, 34.0) | (33.7, 34.6) | 0.24               | (0.7, 3.1)        |
| Higher-Income                                      | 33.4         | 33.6         | 34.3         | 34.1         | 34.3         | 33.6              | 33.9         | 35.1         |                    | 1.7               |
| Individuals                                        | (32.5, 34.2) | (33.2, 34.1) | (33.6, 35.0) | (33.6, 34.5) | (33.9, 34.6) | (33.1, 34.1)      | (33.3, 34.6) | (34.7, 35.5) | 0.006              | (0.8, 2.6)        |
|                                                    |              |              |              |              |              |                   |              |              | 0.65 <sup>b</sup>  | 0.91 <sup>b</sup> |
| <b>Saturated fat, % of energy</b>                  |              |              |              |              |              |                   |              |              |                    |                   |
| SNAP                                               | 11.2         | 10.8         | 11.5         | 11.9         | 11.1         |                   | 11.3         | 11.2         |                    | 0.1               |
| participants                                       | (10.5, 11.8) | (10.1, 11.6) | (10.9, 12.0) | (11.3, 12.5) | (10.7, 11.5) | 11.0 (10.8, 11.2) | (11.0, 11.6) | (10.8, 11.5) | 0.94               | (-0.7, 0.8)       |
| Income-eligible                                    | 10.5         | 10.6         | 11.4         | 11.0         | 10.8         | 10.6              | 10.9         | 11.4         |                    | 0.8               |
| nonparticipants                                    | (10.1, 11.0) | (10.3, 11.0) | (10.9, 11.8) | (10.8, 11.2) | (10.2, 11.3) | (10.3, 11.0)      | (10.6, 11.3) | (11.1, 11.6) | 0.04               | (0.3, 1.4)        |
| Higher-Income                                      | 11.2         | 10.6         | 11.3         | 11.3         | 11.3         | 10.9              | 10.8         | 11.2         |                    | 0.1               |
| Individuals                                        | (10.9, 11.5) | (10.4, 10.8) | (11.0, 11.5) | (11.2, 11.5) | (11.1, 11.5) | (10.7, 11.07)     | (10.6, 11.1) | (11.1, 11.4) | 0.72               | (-0.3, 0.4)       |
|                                                    |              |              |              |              |              |                   |              |              | 0.24 <sup>b</sup>  | 0.09 <sup>b</sup> |
| <b>Monounsaturated fat, % of energy</b>            |              |              |              |              |              |                   |              |              |                    |                   |
| SNAP                                               | 18.7         | 16.1         | 14.0         | 14.8         | 15.6         | 13.1              | 13.4         | 13.5         |                    | -5.2              |
| participants                                       | (8.5, 28.9)  | (12.4, 19.8) | (13.2, 14.9) | (13.4, 16.1) | (14.8, 16.5) | (12.7, 13.5)      | (12.4, 14.4) | (12.9, 14.1) | 0.08               | (-15.0, 4.5)      |
| Income-eligible                                    | 15.47        | 15.5         | 15.0         | 13.8         | 14.7         | 13.7              | 12.8         | 13.5         |                    | -2.1              |
| nonparticipants                                    | (14.4, 16.6) | (14.7, 16.2) | (14.2, 15.9) | (12.6, 14.9) | (13.5, 16.0) | (12.9, 14.6)      | (12.1, 13.4) | (12.8, 14.2) | <0.001             | (-3.4, -0.8)      |
| Higher-Income                                      | 14.2         | 13.4         | 13.6         | 13.6         | 13.8         | 13.0              | 13.0         | 13.5         | 0.01               | -0.8              |
| Individuals                                        | (13.5, 15.0) | (13.0, 13.8) | (13.1, 14.0) | (13.2, 14.0) | (13.4, 14.2) | (12.7, 13.4)      | (12.4, 13.5) | (13.2, 13.8) | 0.001 <sup>b</sup> | (-1.6, 0.1)       |
|                                                    |              |              |              |              |              |                   |              |              |                    | 0.16 <sup>b</sup> |
| <b>Polyunsaturated fat, % of energy</b>            |              |              |              |              |              |                   |              |              |                    |                   |
| SNAP                                               | 6.0          | 6.4          | 6.8          | 6.7          | 6.9          | 6.8               | 7.6          | 7.7          |                    | 1.6               |
| participants                                       | (5.7, 6.4)   | (6.0, 6.9)   | (6.4, 7.1)   | (6.2, 7.2)   | (6.6, 7.2)   | (6.5, 7.1)        | (7.4, 7.8)   | (7.4, 7.9)   | <0.001             | (1.2, 2.1)        |
| Income-eligible                                    | 7.0          | 6.9          | 7.1          | 6.9          | 7.0          | 7.1               | 7.9          | 7.7          |                    | 0.7               |
| nonparticipants                                    | (6.7, 7.3)   | (6.6, 7.2)   | (6.7, 7.6)   | (6.7, 7.2)   | (6.7, 7.2)   | (6.9, 7.3)        | (7.5, 8.2)   | (7.5, 8.0)   | <0.001             | (0.4, 1.1)        |
| Higher-Income                                      | 7.1          | 6.9          | 7.3          | 7.3          | 7.4          | 7.6               | 8.2          | 8.3          |                    | 1.2               |
| Individuals                                        | (6.9, 7.2)   | (6.8, 7.0)   | (7.2, 7.5)   | (7.1, 7.5)   | (7.3, 7.5)   | (7.4, 7.7)        | (8.0, 8.4)   | (8.1, 8.4)   | <0.001             | (1.0, 1.5)        |
|                                                    |              |              |              |              |              |                   |              |              | 0.008 <sup>b</sup> | 0.02 <sup>b</sup> |
| <b>Seafood omega-3 fat, mg/d</b>                   |              |              |              |              |              |                   |              |              |                    |                   |
| SNAP                                               | 141          | 95           | 95           | 116          | 89           | 94                | 94           | 88           | 0.16               | -54               |
| participants                                       | (72, 209)    | (61, 129)    | (72, 117)    | (67, 165)    | (66, 112)    | (76, 112)         | (72, 116)    | (51, 125)    |                    | (-129, 21)        |
| Income-eligible                                    | 130          | 94           | 98           | 89           | 127          | 115               | 113          | 69           |                    | -59               |
| nonparticipants                                    | (80, 179)    | (76, 111)    | (77, 119)    | (69, 109)    | (90, 164)    | (91, 139)         | (81, 144)    | (55, 83)     | 0.24               | (-105, -12)       |
| Higher-Income                                      | 124          | 130          | 139          | 163          | 156          | 125               | 113          | 116          |                    | -7                |
| Individuals                                        | (110, 137)   | (114, 147)   | (116, 162)   | (134, 191)   | (140, 173)   | (107, 142)        | (94, 132)    | (102, 130)   | 0.08               | (-27, 12)         |
|                                                    |              |              |              |              |              |                   |              |              | 0.87 <sup>b</sup>  | 0.08 <sup>b</sup> |
| <b>Plant omega-3 fat, mg/d</b>                     |              |              |              |              |              |                   |              |              |                    |                   |
| SNAP                                               | 118          | 129          | 128          | 127          | 131          | 134               | 156          | 147          |                    | 28                |
| participants                                       | (106, 131)   | (119, 139)   | (124, 133)   | (118, 135)   | (125, 137)   | (127, 141)        | (152, 159)   | (142, 152)   | <0.001             | (15, 42)          |
| Income-eligible                                    | 127          | 133          | 144          | 135          | 135          | 140               | 164          | 149          |                    | 22                |
| nonparticipants                                    | (119, 135)   | (124, 142)   | (134, 154)   | (130, 139)   | (128, 142)   | (135, 145)        | (155, 172)   | (144, 155)   | <0.001             | (13, 32)          |

|                                             |                      |                      |                      |                      |                      |                       |                       |                       |                              |                                              |
|---------------------------------------------|----------------------|----------------------|----------------------|----------------------|----------------------|-----------------------|-----------------------|-----------------------|------------------------------|----------------------------------------------|
| Higher-Income Individuals                   | 140<br>(134, 146)    | 139<br>(136, 141)    | 145<br>(141, 149)    | 144<br>(139, 149)    | 144<br>(140, 147)    | 152<br>(149, 155)     | 168<br>(164, 173)     | 165<br>(160, 169)     | <0.001<br>0.62 <sup>b</sup>  | 24<br>(17, 32)<br>0.79 <sup>b</sup>          |
| <b>Polyunsaturated: saturated fat ratio</b> |                      |                      |                      |                      |                      |                       |                       |                       |                              |                                              |
| SNAP participants                           | 0.61<br>(0.56, 0.66) | 0.69<br>(0.64, 0.73) | 0.64<br>(0.61, 0.68) | 0.62<br>(0.55, 0.68) | 0.67<br>(0.64, 0.7)  | 0.67<br>(0.63, 0.71)  | 0.73<br>(0.71, 0.75)  | 0.75<br>(0.71, 0.79)  | <0.001<br>0.15               | 0.13<br>(0.07, 0.2)<br>0.01                  |
| Income-eligible nonparticipants             | 0.73<br>(0.69, 0.78) | 0.74<br>(0.69, 0.79) | 0.69<br>(0.64, 0.74) | 0.68<br>(0.65, 0.72) | 0.73<br>(0.65, 0.81) | 0.73<br>(0.69, 0.76)  | 0.77<br>(0.74, 0.8)   | 0.73<br>(0.7, 0.76)   |                              | 0.01<br>(-0.05, 0.06)                        |
| Higher-Income Individuals                   | 0.71<br>(0.69, 0.74) | 0.73<br>(0.71, 0.75) | 0.70<br>(0.69, 0.72) | 0.70<br>(0.69, 0.72) | 0.71<br>(0.70, 0.73) | 0.76<br>(0.74, 0.78)  | 0.82<br>(0.79, 0.84)  | 0.80<br>(0.78, 0.81)  | <0.001<br>0.006 <sup>b</sup> | 0.08<br>(0.05, 0.11)<br>0.01 <sup>b</sup>    |
| <b>Protein, % of energy</b>                 |                      |                      |                      |                      |                      |                       |                       |                       |                              |                                              |
| SNAP participants                           | 15.5<br>(14.7, 16.3) | 14.5<br>(13.7, 15.3) | 14.9<br>(14.3, 15.5) | 15.7<br>(14.9, 16.5) | 15.3<br>(14.9, 15.8) | 15.3<br>(15.0, 15.6)  | 15.3<br>(14.8, 15.9)  | 15.5<br>(14.9, 16.1)  | 0.21                         | -0.03<br>(-1.0, 0.9)<br>0.9                  |
| Income-eligible nonparticipants             | 14.8<br>(14.3, 15.3) | 15.0<br>(14.4, 15.5) | 14.7<br>(14.2, 15.3) | 15.7<br>(14.8, 16.6) | 15.5<br>(15.0, 15.9) | 15.9<br>(15.4, 16.3)  | 15.6<br>(15.2, 16.0)  | 15.7<br>(15.1, 16.4)  | <0.001                       | 0.1<br>(0.1, 1.7)                            |
| Higher-Income Individuals                   | 15.5<br>(15.2, 15.8) | 15.3<br>(15.0, 15.6) | 15.8<br>(15.6, 16.0) | 16.1<br>(15.9, 16.4) | 16.0<br>(15.8, 16.2) | 16.1<br>(15.8, 16.4)  | 15.7<br>(15.4, 16.0)  | 16.4<br>(16.1, 16.7)  | <0.001<br>0.47 <sup>b</sup>  | 0.9<br>(0.5, 1.3)<br>0.14 <sup>b</sup>       |
| <b>Carbohydrate, % of energy</b>            |                      |                      |                      |                      |                      |                       |                       |                       |                              |                                              |
| SNAP participants                           | 50.4<br>(48.9, 51.9) | 52.4<br>(50.1, 54.7) | 50.1<br>(49.1, 51.1) | 48.3<br>(45.9, 50.6) | 50.2<br>(48.6, 51.8) | 50.91<br>(50.1, 51.7) | 49.8<br>(48.7, 51.0)  | 49.5<br>(48.5, 50.5)  | 0.11                         | -0.9<br>(-2.6, 0.8)                          |
| Income-eligible nonparticipants             | 52.5<br>(51.4, 53.7) | 51.0<br>(49.8, 52.3) | 50.1<br>(49.3, 51.0) | 50.3<br>(49.2, 51.4) | 50.2<br>(49.1, 51.2) | 49.8<br>(49.1, 50.5)  | 50.4<br>(49.4, 51.4)  | 48.5<br>(47.6, 49.4)  | <0.001                       | -4.0<br>(-5.5, -2.6)                         |
| Higher-Income Individuals                   | 49.9<br>(49.1, 50.8) | 50.2<br>(49.4, 51.0) | 48.5<br>(47.7, 49.2) | 48.3<br>(47.7, 49.0) | 48.4<br>(47.9, 48.9) | 48.5<br>(48.0, 49.0)  | 48.2<br>(47.4, 49.0)  | 46.5<br>(46.1, 47.0)  | <0.001<br>0.17 <sup>b</sup>  | -3.4<br>(-4.4, -2.5)<br>0.02 <sup>b</sup>    |
| <b>Cholesterol, mg/d</b>                    |                      |                      |                      |                      |                      |                       |                       |                       |                              |                                              |
| SNAP participants                           | 332<br>(292, 371)    | 259<br>(226, 291)    | 278<br>(263, 292)    | 288<br>(258, 318)    | 303<br>(290, 315)    | 273<br>(262, 284)     | 276<br>(259, 292)     | 259<br>(247, 272)     | 0.005                        | -73<br>(-113, -32)                           |
| Income-eligible nonparticipants             | 269<br>(247, 292)    | 274<br>(254, 294)    | 277<br>(254, 300)    | 278<br>(258, 298)    | 278<br>(269, 287)    | 281<br>(254, 309)     | 263<br>(246, 280)     | 263<br>(239, 288)     | 0.40                         | -9.46<br>(-42.38, 23.46)                     |
| Higher-Income Individuals                   | 271<br>(259, 283)    | 259<br>(250, 268)    | 277<br>(267, 287)    | 277<br>(269, 285)    | 281<br>(271, 291)    | 264<br>(257, 271)     | 270<br>(258, 282)     | 276<br>(268, 285)     | 0.37<br>0.02 <sup>b</sup>    | 5.79<br>(-8.45, 20.03)<br>0.014 <sup>b</sup> |
| <b>Fiber, g/d</b>                           |                      |                      |                      |                      |                      |                       |                       |                       |                              |                                              |
| SNAP participants                           | 13.1<br>(11.4, 14.9) | 14.2<br>(13.0, 15.5) | 13.3<br>(12.5, 14.0) | 13.7<br>(12.8, 14.5) | 14.0<br>(13.1, 14.9) | 14.8<br>(14.3, 15.4)  | 16.1<br>(14.9, 17.3)  | 13.7<br>(12.8, 14.6)  | 0.03                         | 0.5<br>(-1.5, 2.5)                           |
| Income-eligible nonparticipants             | 14.8<br>(13.8, 15.7) | 14.6<br>(13.6, 15.7) | 14.3<br>(13.7, 14.8) | 15.4<br>(14.6, 16.2) | 14.9<br>(13.5, 16.4) | 16.0<br>(15.4, 16.6)  | 17.27<br>(16.4, 18.2) | 14.99<br>(14.0, 16.0) | 0.004                        | 0.1<br>(-1.3, 1.5)                           |
| Higher-Income Individuals                   | 15.6<br>(14.8, 16.3) | 15.7<br>(15.3, 16.2) | 15.4<br>(14.9, 15.9) | 16.0<br>(15.6, 16.5) | 16.5<br>(15.8, 17.1) | 17.5<br>(17.0, 17.9)  | 17.7<br>(17.1, 18.4)  | 16.6<br>(16.2, 17.0)  | <0.001<br>0.63 <sup>b</sup>  | 1.1<br>(0.2, 1.9)<br>0.55 <sup>b</sup>       |
| <b>Sodium, mg/d</b>                         |                      |                      |                      |                      |                      |                       |                       |                       |                              |                                              |
| SNAP participants                           | 3434<br>(3135, 3732) | 3371<br>(3128, 3613) | 3332<br>(3236, 3428) | 3359<br>(3178, 3540) | 3436<br>(3342, 3529) | 3396<br>(3336, 3457)  | 3382<br>(3259, 3504)  | 3166<br>(3084, 3249)  | 0.07                         | -273<br>(-571, 24)                           |
| Income-eligible nonparticipants             | 3237<br>(3096, 3378) | 3356<br>(3232, 3480) | 3415<br>(3298, 3532) | 3410<br>(3264, 3556) | 3356<br>(3238, 3474) | 3438<br>(3318, 3558)  | 3502<br>(3410, 3594)  | 3187<br>(3083, 3291)  | 0.63                         | -53<br>(-223, 117)                           |
| Higher-Income Individuals                   | 3432<br>(3363, 3501) | 3338<br>(3301, 3376) | 3458<br>(3414, 3503) | 3566<br>(3502, 3629) | 3516<br>(3466, 3566) | 3456<br>(3414, 3498)  | 3383<br>(3337, 3428)  | 3296<br>(3247, 3345)  | 0.05<br>0.25 <sup>b</sup>    | -132<br>(-216, -49)<br>0.56 <sup>b</sup>     |
| <b>Potassium, mg/d</b>                      |                      |                      |                      |                      |                      |                       |                       |                       |                              |                                              |
| SNAP participants                           | 2538<br>(2361, 2716) | 2393<br>(2240, 2547) | 2496<br>(2414, 2579) | 2658<br>(2550, 2766) | 2473<br>(2388, 2557) | 2548<br>(2488, 2608)  | 2541<br>(2470, 2613)  | 2292<br>(2225, 2358)  | 0.02                         | -253<br>(-440, -66)                          |

|                                 |                            |                      |                      |                      |                      |                      |                      |                      |                             |                                           |
|---------------------------------|----------------------------|----------------------|----------------------|----------------------|----------------------|----------------------|----------------------|----------------------|-----------------------------|-------------------------------------------|
| Income-eligible nonparticipants | 2567<br>(2479, 2655)       | 2429<br>(2349, 2509) | 2502<br>(2421, 2584) | 2623<br>(2538, 2708) | 2521<br>(2410, 2632) | 2639<br>(2561, 2716) | 2630<br>(2556, 2704) | 2364<br>(2270, 2458) | 0.75                        | -208<br>(-338, -78)                       |
| Higher-Income Individuals       | 2742<br>(2670, 2814)       | 2678<br>(2618, 2738) | 2644<br>(2607, 2681) | 2691<br>(2634, 2748) | 2656<br>(2601, 2711) | 2768<br>(2730, 2806) | 2731<br>(2667, 2795) | 2551<br>(2505, 2597) | 0.08<br>0.24 <sup>b</sup>   | -189<br>(-274, -104)<br>0.81 <sup>b</sup> |
| <b>Magnesium, mg/d</b>          |                            |                      |                      |                      |                      |                      |                      |                      |                             |                                           |
| SNAP participants               | 243<br>(227, 260)          | 232<br>(217, 247)    | 240<br>(229, 251)    | 278<br>(266, 289)    | 258<br>(248, 269)    | 275<br>(267, 283)    | 280<br>(269, 291)    | 253<br>(241, 266)    | 0.0005                      | 8<br>(-12, 28)                            |
| Income-eligible nonparticipants | 258<br>(246, 271)          | 251<br>(239, 263)    | 250<br>(241, 259)    | 280<br>(271, 290)    | 283<br>(261, 305)    | 292<br>(285, 300)    | 284<br>(275, 293)    | 271<br>(259, 283)    | <0.001                      | 12<br>(-5, 30)                            |
| Higher-Income Individuals       | 273.57<br>(264.29, 282.85) | 271<br>(263, 278)    | 270<br>(264, 275)    | 297<br>(291, 303)    | 294<br>(286, 302)    | 307<br>(302, 312)    | 305<br>(297, 314)    | 291<br>(286, 297)    | <0.001<br>0.71 <sup>b</sup> | 18<br>(8, 29)<br>0.55 <sup>b</sup>        |
| <b>Calcium, mg/d</b>            |                            |                      |                      |                      |                      |                      |                      |                      |                             |                                           |
| SNAP participants               | 737<br>(636, 838)          | 718<br>(678, 758)    | 798<br>(747, 849)    | 895<br>(818, 972)    | 816<br>(775, 858)    | 954<br>(924, 983)    | 990<br>(940, 1039)   | 871<br>(838, 904)    | <0.001                      | 126<br>(25, 228)                          |
| Income-eligible nonparticipants | 733<br>(695, 772)          | 758<br>(693, 823)    | 790<br>(749, 831)    | 888<br>(843, 933)    | 905<br>(837, 973)    | 949<br>(914, 984)    | 981<br>(906, 1057)   | 894<br>(852, 937)    | <0.001                      | 161<br>(104, 218)                         |
| Higher-Income Individuals       | 809<br>(775, 844)          | 830<br>(806, 853)    | 841<br>(818, 864)    | 920<br>(898, 941)    | 927<br>(901, 954)    | 1003<br>(984, 1023)  | 940<br>(916, 964)    | 917<br>(890, 935)    | <0.001<br>0.03 <sup>b</sup> | 109<br>(71, 148)<br>0.33 <sup>b</sup>     |

Abbreviations: AHA, American Heart Association; SNAP: Supplemental Nutrition Assistance Program

<sup>a</sup>. Survey-weighted mean scores were adjusted for age, sex, and race/ethnicity

<sup>b</sup>. Survey-weighted P for interaction that assessed whether the trend in mean take or change in mean intake differed by SNAP participation status

**eTable 7.** Crude and Adjusted Trends in the American Heart Association (AHA) 2020 Diet Score by SNAP Participation Status, 2003-2014<sup>a</sup>

|                                                                                              | Survey-Weighted Mean Score (95% CI) <sup>a</sup> |                       |                       |                       |                       |                       | P for Trend       | Mean Change From 2003-2004 to 2013-2014 (95% CI) |
|----------------------------------------------------------------------------------------------|--------------------------------------------------|-----------------------|-----------------------|-----------------------|-----------------------|-----------------------|-------------------|--------------------------------------------------|
|                                                                                              | 2003-2004<br>(n=4066)                            | 2005-2006<br>(n=4030) | 2007-2008<br>(n=4654) | 2009-2010<br>(n=4996) | 2011-2012<br>(n=4288) | 2013-2014<br>(n=4437) |                   |                                                  |
| <b>Total AHA diet score (unadjusted)</b>                                                     |                                                  |                       |                       |                       |                       |                       |                   |                                                  |
| SNAP participants                                                                            | 31.5 (29.2, 33.8)                                | 30.8 (28.6, 32.9)     | 31.1 (29.5, 32.8)     | 32.8 (31.2, 34.5)     | 33.8 (32.7, 34.8)     | 32.1 (30.6, 33.6)     | 0.11              | 0.57 (-2.18, 0.33)                               |
| Lower-income SNAP participants                                                               | 30.6 (28.4,32.8)                                 | 30.4(27.6,33.3)       | 30.9(28.7,33.2)       | 32.5(31.3,33.7)       | 32.9(31.1,34.8)       | 31.7(30,33.4)         | 0.14              | 1.10 (-1.68, 3.88)                               |
| Higher-income SNAP participants                                                              | 33.8 (30.6, 37.0)                                | 31.3(28.9,33.7)       | 30.9(28.2,33.6)       | 33.8(29.7,37.9)       | 35.1(33.5,36.7)       | 32.2(29.8,34.6)       | 0.54              | -1.56 (-5.51, 2.39)                              |
| Income-eligible nonparticipants                                                              | 34.2 (32.6, 35.9)                                | 34.7 (33.1, 36.3)     | 34.9 (32.7, 37.1)     | 36.3 (34.8, 37.9)     | 36.5 (35.2, 37.7)     | 36.8 (35.3, 38.3)     | 0.004             | 2.56 (0.36, 4.76)                                |
| Higher-income individuals                                                                    | 35.8 (34.6, 36.9)                                | 36.4 (35.3, 37.4)     | 36.7 (35.5, 37.8)     | 38.7 (37.9, 39.4)     | 40.0 (38.5, 41.5)     | 39.6 (38.7, 40.5)     | <0.001            | 3.84 (2.39, 5.29)                                |
|                                                                                              |                                                  |                       |                       |                       |                       | P-interaction         | 0.02 <sup>b</sup> | 0.04 <sup>c</sup>                                |
| <b>Total AHA diet score (adjusted for change in age, sex, and race/ethnicity)</b>            |                                                  |                       |                       |                       |                       |                       |                   |                                                  |
| SNAP participants                                                                            | 32.5 (30.4, 34.6)                                | 31.9 (29.8, 34.1)     | 31.9 (30.4, 33.3)     | 33.3 (31.8, 34.8)     | 34.4 (33.4, 35.5)     | 32.5 (30.9, 34.1)     | 0.21              | 0.01 (-2.17, 2.20)                               |
| Lower-income SNAP participants                                                               | 31.4(29.5,33.4)                                  | 31.4(28.6,34.3)       | 31.4(29.5,33.3)       | 32.5(31.4,33.5)       | 33.2(31.3,35.2)       | 31.8(30.1,33.5)       | 0.36              | 0.32 (-1.95, 2.58)                               |
| Higher-income SNAP participants                                                              | 35.0(31.8,38.1)                                  | 32.3(29.9,34.7)       | 32.1(29.0,35.3)       | 35.0(30.9,39.1)       | 36.0(34.4,37.6)       | 33.0(30.5,35.5)       | 0.33              | -1.00 (-4.60, 2.60)                              |
| Income-eligible nonparticipants                                                              | 34.4 (32.8, 35.9)                                | 34.4 (32.9, 36.0)     | 34.6 (32.2, 37.1)     | 36.3 (34.7, 38.0)     | 36.4 (35.0, 37.7)     | 36.7 (35.2, 38.3)     | 0.008             | 2.16 (0.01, 4.30)                                |
| Higher-income individuals                                                                    | 35.9 (34.8, 37.1)                                | 36.5 (35.4, 37.5)     | 36.7 (35.5, 37.8)     | 38.5 (37.8, 39.2)     | 39.7 (38.1, 41.2)     | 39.2 (38.3, 40.2)     | <0.001            | 3.33 (1.86, 4.80)                                |
|                                                                                              |                                                  |                       |                       |                       |                       | P-interaction         | 0.01 <sup>b</sup> | 0.02 <sup>c</sup>                                |
| <b>Total AHA diet score (adjusted for change in age, sex, race/ethnicity, and education)</b> |                                                  |                       |                       |                       |                       |                       |                   |                                                  |
| SNAP participants                                                                            | 34.2 (32.2,36.1)                                 | 33.4(31.2,35.5)       | 33.7(32.3,35.1)       | 35(33.6,36.4)         | 35.8(34.7,36.8)       | 33.9(32.4,35.4)       | 0.35              | -0.25 (-2.36, 1.89)                              |
| Lower-income SNAP participants                                                               | 31.9(30.0,33.8)                                  | 31.8(29.0,34.7)       | 32.0(30.2,33.8)       | 32.9(31.9,33.9)       | 33.5(31.7,35.4)       | 32.0(30.4,33.7)       | 0.48              | 0.13 (-2.13,2.40)                                |
| Higher-income SNAP participants                                                              | 36.7(33.7,39.8)                                  | 33.6(35.7,37.9)       | 33.8(30.9,36.7)       | 36.9(33.0,40.8)       | 37.1(35.5,38.8)       | 34.3(31.9,36.7)       | 0.55              | -1.56 (-5.04,1.93)                               |
| Income-eligible nonparticipants                                                              | 35.8 (34.3,37.3)                                 | 35.6(34.1,37.1)       | 35.9(33.8,38)         | 37.1(35.7,38.6)       | 37.3(36.2,38.4)       | 37.4(35.9,39)         | 0.04              | 1.51 (-0.54, 3.57)                               |
| Higher-income individuals                                                                    | 35.9 (34.9,36.8)                                 | 36.3(35.3,37.3)       | 36.5(35.5,37.4)       | 38.1(37.4,38.7)       | 38.8(37.3,40.2)       | 38.3(37.4,39.2)       | <0.001            | 2.48 (1.23, 3.72)                                |
|                                                                                              |                                                  |                       |                       |                       |                       | P-interaction         | 0.06 <sup>b</sup> | 0.048 <sup>c</sup>                               |
| <b>Total AHA diet score (adjusted for change in age, sex, race/ethnicity, and income)</b>    |                                                  |                       |                       |                       |                       |                       |                   |                                                  |
| SNAP participants                                                                            | 34.8 (32.8, 36.9)                                | 33.9 (31.7,36.1)      | 34.2(32.6,35.9)       | 35.7 (34.3,37.0)      | 36.6(35.4,37.7)       | 34.5(33,36)           | 0.27              | -0.16 (-2.33, 2.01)                              |
| Income-eligible nonparticipants                                                              | 37.0 (35.4, 38.6)                                | 37.1 (35.5,38.7)      | 37.3(34.9,39.6)       | 39.0 (37.3,40.7)      | 39.1(37.6,40.6)       | 39.3(37.6,40.9)       | <0.01             | 2.18 (0.04, 4.32)                                |
| Higher-income individuals                                                                    | 35.1 (34.0, 36.2)                                | 35.6 (34.5,36.7)      | 35.8(34.5,37.1)       | 37.6(36.9,38.3)       | 38.9(37.3,40.5)       | 38.3(37.4,39.2)       | <0.001            | 3.17 (1.78, 4.56)                                |
|                                                                                              |                                                  |                       |                       |                       |                       | P-interaction         | 0.04 <sup>b</sup> | 0.01 <sup>c</sup>                                |

Abbreviations: AHA, American Heart Association; SNAP: Supplemental Nutrition Assistance Program

<sup>a</sup>. The total AHA diet score is the sum of the scores for 8 primary dietary components (fruits/vegetables, whole grains, fish/shellfish, sugar-sweetened beverages, and sodium, nuts/seeds/legumes, processed meat, and saturated fat).

<sup>b</sup>. P for interaction assessing potential heterogeneous trends in total AHA diet score by SNAP participation status (SNAP participants, income-eligible nonparticipants, and higher-income individuals)

<sup>c</sup>. P for interaction assessing potential heterogeneous change in total AHA diet score from 2003-2004 to 2013-2014 by SNAP participation status (SNAP participants, income-eligible nonparticipants, and higher-income individuals)



**eTable 8.** Mean Change in Dietary Components of the American Heart Association (AHA) 2020 Strategic Impact Goals among SNAP Participants from 1999-2002 to 2011-2014, by Age

| Dietary Intake                        | Survey-Weighted Mean Intake or Change (95% CI) |                      |                          |                      |                      |                        |                      |                      |                        |                      |                      | P for Interaction      |      |
|---------------------------------------|------------------------------------------------|----------------------|--------------------------|----------------------|----------------------|------------------------|----------------------|----------------------|------------------------|----------------------|----------------------|------------------------|------|
|                                       | Age 20-34                                      |                      | Mean Change (95% CI)     | Age 35-49            |                      | Mean Change (95% CI)   | Age 50-64            |                      | Mean Change (95% CI)   | Age ≥65              |                      |                        |      |
|                                       | 1999-2002 (n=328)                              | 2011-2014 (n=768)    |                          | 1999-2002 (n=204)    | 2011-2014 (n=578)    |                        | 1999-2002 (n=161)    | 2011-2014 (n=575)    |                        | 1999-2002 (n=147)    | 2011-2014 (n=322)    |                        |      |
| Fruits and vegetables, servings/d     | 1.08<br>(0.85, 1.31)                           | 1.19<br>(1.06, 1.33) | 0.11<br>(-0.15, 0.38)    | 1.31<br>(0.97, 1.65) | 1.27<br>(1.11, 1.43) | -0.04<br>(-0.41,0.33)  | 1.52<br>(1.28,1.76)  | 1.70<br>(1.4,2.0)    | 0.18<br>(-0.2,0.55)    | 2.00<br>(1.53, 2.47) | 2.02<br>(1.73, 2.31) | 0.02<br>(-0.52, 0.56)  | 0.91 |
| Whole grains, servings/d              | 0.32<br>(0.21, 0.44)                           | 0.66<br>(0.56, 0.77) | 0.34***<br>(0.19, 0.49)  | 0.34<br>(0.21, 0.47) | 0.60<br>(0.50, 0.70) | 0.26**<br>(0.10,0.42)  | 0.68<br>(0.43,0.92)  | 0.80<br>(0.69,0.91)  | 0.12<br>(-0.14,0.38)   | 0.59<br>(0.32, 0.87) | 1.06<br>(0.89, 1.24) | 0.47**<br>(0.15, 0.79) | 0.79 |
| Fish and shellfish, servings/d        | 0.10<br>(0.04, 0.16)                           | 0.14<br>(0.09, 0.18) | 0.03<br>(-0.04, 0.11)    | 0.14<br>(0.04, 0.24) | 0.24<br>(0.17, 0.31) | 0.10<br>(-0.01,0.21)   | 0.10<br>(0.05,0.16)  | 0.17<br>(0.12,0.21)  | 0.06<br>(-0.01,0.13)   | 0.14<br>(0.05, 0.22) | 0.19<br>(0.10, 0.28) | 0.06<br>(-0.07, 0.18)  | 0.67 |
| Sugar-sweetened beverages, servings/d | 3.04<br>(2.40, 3.67)                           | 2.29<br>(1.99, 2.59) | -0.75*<br>(-1.43, -0.06) | 2.38<br>(1.78, 2.98) | 1.97<br>(1.70, 2.24) | -0.41<br>(-1.05,0.24)  | 1.86<br>(1.52,2.19)  | 1.41<br>(1.11,1.71)  | -0.44*<br>(-0.89,0)    | 0.94<br>(0.67, 1.21) | 0.69<br>(0.48, 0.90) | -0.25<br>(-0.58, 0.08) | 0.27 |
| Sodium, mg/d                          | 3138<br>(2945, 3332)                           | 3125<br>(3045, 3205) | -13<br>(-219, 192)       | 3386<br>(2989, 3782) | 3247<br>(3118, 3377) | -138<br>(-547,271)     | 3504<br>(3200,3809)  | 3293<br>(3186,3401)  | -211<br>(-528,105)     | 3806<br>(3498, 4114) | 3529<br>(3365, 3692) | -277<br>(-618, 64)     | 0.10 |
| Nuts, seeds, and legumes, servings/d  | 0.23<br>(0.15, 0.31)                           | 0.40<br>(0.32, 0.49) | 0.17**<br>(0.05, 0.29)   | 0.27<br>(0.17, 0.37) | 0.38<br>(0.27, 0.48) | 0.10<br>(-0.03,0.24)   | 0.34<br>(0.17,0.51)  | 0.46<br>(0.31, 0.61) | 0.12<br>(-0.1, 0.35)   | 0.88<br>(-0.4, 2.17) | 0.52<br>(0.4, 0.65)  | -0.36<br>(-1.63, 0.9)  | 0.39 |
| Processed meat, servings/d            | 0.26<br>(0.19, 0.32)                           | 0.29<br>(0.27, 0.32) | 0.03<br>(-0.03, 0.10)    | 0.34<br>(0.20, 0.47) | 0.30<br>(0.25, 0.36) | -0.03<br>(-0.17, 0.11) | 0.16<br>(0.10, 0.22) | 0.33<br>(0.23, 0.42) | 0.16**<br>(0.06, 0.27) | 0.21<br>(0.12, 0.31) | 0.27<br>(0.2, 0.33)  | 0.06<br>(-0.06, 0.17)  | 0.19 |
| Saturated fat, % of energy            | 11.0<br>(10.5, 11.5)                           | 10.9<br>(10.6, 11.3) | -0.04<br>(-0.7, 0.6)     | 10.7<br>(9.9, 11.6)  | 10.8<br>(10.4, 11.1) | 0.02<br>(-0.9, 0.9)    | 10.3<br>(9.5, 11.1)  | 10.8<br>(10.3, 11.2) | 0.47<br>(-0.5, 1.4)    | 10.0<br>(9.0, 10.9)  | 10.9<br>(10.3, 11.4) | 0.9<br>(-0.2, 2.0)     | 0.08 |

Abbreviations: AHA, American Heart Association; SNAP: Supplemental Nutrition Assistance Program

a. The mean change from 1999-2002 to 2011-2014 was statistically significant (\*p<0.05; \*\* p<0.01; \*\*\* p<0.001)

**eTable 9.** Mean Change in Dietary Components of the American Heart Association (AHA) 2020 Strategic Impact Goals among SNAP Participants from 1999-2002 to 2011-2014, by Gender

| Dietary Intake                        | Survey-Weighted Mean Intake or Change (95% CI) |                      |                        |                      |                      |                            | P for Interaction |
|---------------------------------------|------------------------------------------------|----------------------|------------------------|----------------------|----------------------|----------------------------|-------------------|
|                                       | Male                                           |                      | Mean Change (95% CI)   | Female               |                      | Mean Change (95% CI)       |                   |
|                                       | 1999-2002 (n=313)                              | 2011-2014 (n=1011)   |                        | 1999-2002 (n=527)    | 2011-2014 (n=1232)   |                            |                   |
| Fruits and vegetables, servings/d     | 1.32<br>(1.09, 1.55)                           | 1.21<br>(1.09, 1.33) | -0.11<br>(-0.36, 0.14) | 1.32<br>(1.15, 1.50) | 1.61<br>(1.41, 1.80) | 0.28*<br>(0.03, 0.54)      | 0.01              |
| Whole grains, servings/d              | 0.44<br>(0.31, 0.57)                           | 0.66<br>(0.57, 0.74) | 0.22**<br>(0.06, 0.37) | 0.41<br>(0.29, 0.53) | 0.78<br>(0.69, 0.86) | 0.37***<br>(0.22, 0.51)    | 0.14              |
| Fish and shellfish, servings/d        | 0.13<br>(0.06, 0.20)                           | 0.19<br>(0.14, 0.23) | 0.06<br>(-0.03, 0.14)  | 0.11<br>(0.06, 0.16) | 0.17<br>(0.13, 0.21) | 0.06<br>(-0.01, 0.13)      | 0.92              |
| Sugar-sweetened beverages, servings/d | 2.33<br>(1.98, 2.69)                           | 1.96<br>(1.74, 2.19) | -0.37<br>(-0.78, 0.04) | 2.47<br>(2.14, 2.80) | 1.71<br>(1.48, 1.93) | -0.76***<br>(-1.15, -0.37) | 0.06              |
| Sodium, mg/d                          | 3341<br>(3176, 3506)                           | 3139<br>(3057, 3222) | -202*<br>(-383, -21)   | 3346<br>(3146, 3546) | 3325<br>(3251, 3398) | -22<br>(-230, 187)         |                   |
| Nuts, seeds, and legumes, servings/d  | 0.28<br>(0.20, 0.35)                           | 0.42<br>(0.32, 0.51) | 0.14*<br>(0.02, 0.26)  | 0.37<br>(0.12, 0.62) | 0.43<br>(0.33, 0.52) | 0.06<br>(-0.21, 0.32)      | 0.20              |
| Processed meat, servings/d            | 0.32<br>(0.24, 0.41)                           | 0.38<br>(0.31, 0.44) | 0.05<br>(-0.05, 0.16)  | 0.22<br>(0.17, 0.26) | 0.24<br>(0.21, 0.27) | 0.02<br>(-0.03, 0.07)      | 0.55              |
| Saturated fat, % of energy            | 10.7<br>(10.3, 11.2)                           | 10.7<br>(10.5, 11.0) | -0.01<br>(-0.5, 0.5)   | 10.6<br>(10.1, 11.1) | 10.9<br>(10.6, 11.2) | 0.3<br>(-0.3, 0.9)         | 0.56              |

Abbreviations: AHA, American Heart Association; SNAP: Supplemental Nutrition Assistance Program

a. The mean change from 1999-2002 to 2011-2014 was statistically significant (\*p<0.05; \*\* p<0.01; \*\*\* p<0.001)

**eTable 10.** Mean Change in Dietary Components of the American Heart Association (AHA) 2020 Strategic Impact Goals among SNAP Participants from 1999-2002 to 2011-2014, by Race/Ethnicity

| Dietary Intake                        | Survey-Weighted Mean Intake or Change (95% CI) |                      |                        |                       |                      |                            |                      |                      |                         | P for Interaction |
|---------------------------------------|------------------------------------------------|----------------------|------------------------|-----------------------|----------------------|----------------------------|----------------------|----------------------|-------------------------|-------------------|
|                                       | Non-Hispanic White                             |                      | Mean Change (95% CI)   | Non-Hispanic Black    |                      | Mean Change (95% CI)       | Hispanic             |                      | Mean Change (95% CI)    |                   |
|                                       | 1999-2002 (n=233)                              | 2011-2014 (n=773)    |                        | 1999-2002 (n=300)     | 2011-2014 (n=784)    |                            | 1999-2002 (n=276)    | 2011-2014 (n=512)    |                         |                   |
| Fruits and vegetables, servings/d     | 1.39<br>(1.06, 1.71)                           | 1.40<br>(1.18, 1.62) | 0.02<br>(-0.37, 0.40)  | 1.18<br>(1.00, 1.36)  | 1.23<br>(1.08, 1.38) | 0.05<br>(-0.18, 0.28)      | 1.34<br>(1.14, 1.54) | 1.65<br>(1.50, 1.80) | 0.31*<br>(0.07, 0.56)   | 0.25              |
| Whole grains, servings/d              | 0.49<br>(0.31, 0.68)                           | 0.72<br>(0.61, 0.84) | 0.23*<br>(0.02, 0.44)  | 0.35<br>(0.23, 0.47)  | 0.70<br>(0.59, 0.81) | 0.35***<br>(0.19, 0.51)    | 0.37<br>(0.20, 0.54) | 0.66<br>(0.51, 0.81) | 0.29*<br>(0.06, 0.51)   | 0.64              |
| Fish and shellfish, servings/d        | 0.06<br>(0.02, 0.11)                           | 0.12<br>(0.07, 0.16) | 0.06<br>(-0.01, 0.12)  | 0.29<br>(0.19, 0.38)  | 0.26<br>(0.18, 0.34) | -0.03<br>(-0.15, 0.09)     | 0.06<br>(0.02, 0.10) | 0.18<br>(0.13, 0.24) | 0.12***<br>(0.06, 0.19) | 0.09              |
| Sugar-sweetened beverages, servings/d | 2.39<br>(1.75, 3.03)                           | 2.01<br>(1.70, 2.32) | -0.38<br>(-1.07, 0.31) | 2.53<br>(2.25, 2.80)  | 1.77<br>(1.62, 1.92) | -0.76***<br>(-1.07, -0.45) | 2.11<br>(1.41, 2.81) | 1.45<br>(1.23, 1.67) | -0.66<br>(-1.38, 0.06)  | 0.64              |
| Sodium, mg/d                          | 3433<br>(3111, 3755)                           | 3237<br>(3134, 3340) | -196<br>(-527, 135)    | 3285<br>(3146, 3424)  | 3271<br>(3167, 3375) | -14<br>(-183, 156)         | 3173<br>(3036, 3311) | 3194<br>(3074, 3315) | 21<br>(-158, 200)       | 0.59              |
| Nuts, seeds, and legumes, servings/d  | 0.28<br>(0.17, 0.38)                           | 0.43<br>(0.31, 0.55) | 0.16*<br>(0, 0.31)     | 0.48<br>(-0.16, 1.13) | 0.36<br>(0.29, 0.42) | -0.13<br>(-0.76, 0.5)      | 0.35<br>(0.18, 0.51) | 0.40<br>(0.29, 0.51) | 0.05<br>(-0.14, 0.25)   | 0.55              |
| Processed meat, servings/d            | 0.27<br>(0.18, 0.36)                           | 0.34<br>(0.27, 0.42) | 0.07<br>(-0.04, 0.19)  | 0.32<br>(0.27, 0.37)  | 0.31<br>(0.28, 0.33) | -0.01<br>(-0.06, 0.04)     | 0.18<br>(0.13, 0.23) | 0.21<br>(0.18, 0.25) | 0.03<br>(-0.03, 0.09)   | 0.26              |
| Saturated fat, % of energy            | 11.2<br>(10.5, 11.9)                           | 11.4<br>(11.1, 11.8) | 0.2<br>(-0.5, 1.0)     | 10.1<br>(9.6, 10.5)   | 10.7<br>(10.3, 11.1) | 0.6*<br>(0.1, 1.2)         | 10.3<br>(9.4, 11.2)  | 10.1<br>(9.6, 10.6)  | -0.2<br>(-1.2, 0.8)     | 0.29              |

Abbreviations: AHA, American Heart Association; SNAP: Supplemental Nutrition Assistance Program

a. The mean change from 1999-2002 to 2011-2014 was statistically significant (\*p<0.05; \*\* p<0.01; \*\*\* p<0.001)

**eTable 11.** Mean Change in Dietary Components of the American Heart Association (AHA) 2020 Strategic Impact Goals among SNAP Participants from 1999-2002 to 2011-2014, by Education

| Dietary Intake                        | Survey-Weighted Mean Intake or Change (95% CI) |                      |                         |                                    |                      |                         |                       |                      | P for Interaction        |                         |
|---------------------------------------|------------------------------------------------|----------------------|-------------------------|------------------------------------|----------------------|-------------------------|-----------------------|----------------------|--------------------------|-------------------------|
|                                       | < High School                                  |                      | Mean Change<br>(95% CI) | High School Graduate or Equivalent |                      | Mean Change<br>(95% CI) | Some College or Above |                      |                          | Mean Change<br>(95% CI) |
|                                       | 1999-2002<br>(n=485)                           | 2011-2014<br>(n=790) |                         | 1999-2002<br>(n=184)               | 2011-2014<br>(n=638) |                         | 1999-2002<br>(n=168)  | 2011-2014<br>(n=813) |                          |                         |
| Fruits and vegetables, servings/d     | 1.35<br>(1.15, 1.55)                           | 1.29<br>(1.15, 1.42) | -0.06<br>(-0.31,0.18)   | 1.28<br>(1.01, 1.56)               | 1.28<br>(1.11, 1.45) | 0<br>(-0.32,0.32)       | 1.30<br>(1.05, 1.54)  | 1.63<br>(1.39, 1.87) | 0.34*<br>(0,0.67)        | 0.06                    |
| Whole grains, servings/d              | 0.34<br>(0.22, 0.47)                           | 0.63<br>(0.5, 0.76)  | 0.29**<br>(0.11,0.47)   | 0.38<br>(0.24, 0.52)               | 0.72<br>(0.63, 0.82) | 0.34***<br>(0.18,0.51)  | 0.60<br>(0.39, 0.81)  | 0.79<br>(0.69, 0.89) | 0.19<br>(-0.04,0.42)     | 0.55                    |
| Fish and shellfish, servings/d        | 0.14<br>(0.07, 0.21)                           | 0.19<br>(0.14, 0.25) | 0.05<br>(-0.03,0.14)    | 0.06<br>(0.02, 0.10)               | 0.15<br>(0.10, 0.20) | 0.09**<br>(0.03,0.15)   | 0.14<br>(0.06, 0.22)  | 0.19<br>(0.14, 0.23) | 0.05<br>(-0.04,0.14)     | 0.87                    |
| Sugar-sweetened beverages, servings/d | 2.19<br>(1.94, 2.44)                           | 1.84<br>(1.54, 2.14) | -0.35<br>(-0.73,0.03)   | 2.72<br>(1.80, 3.63)               | 2.03<br>(1.82, 2.25) | -0.68<br>(-1.6,0.24)    | 2.57<br>(1.92, 3.22)  | 1.66<br>(1.4, 1.92)  | -0.91**<br>(-1.59,-0.23) | 0.09                    |
| Sodium, mg/d                          | 3436<br>(3248, 3625)                           | 3150<br>(3055, 3246) | -286**<br>(-493, -79)   | 3332<br>(3044, 3620)               | 3273<br>(3176, 3370) | -59<br>(-356, 238)      | 3186<br>(2860, 3512)  | 3283<br>(3174, 3393) | 97<br>(-240, 434)        | 0.09                    |
| Nuts, seeds, and legumes, servings/d  | 0.42<br>(0.11, 0.74)                           | 0.34<br>(0.21, 0.47) | -0.09<br>(-0.42,0.25)   | 0.19<br>(0.10, 0.29)               | 0.40<br>(0.30, 0.49) | 0.21**<br>(0.08,0.34)   | 0.32<br>(0.19, 0.46)  | 0.50<br>(0.39, 0.62) | 0.18*<br>(0.01,0.35)     | 0.12                    |
| Processed meat, servings/d            | 0.22<br>(0.18, 0.27)                           | 0.26<br>(0.22, 0.3)  | 0.03<br>(-0.02,0.09)    | 0.30<br>(0.19, 0.41)               | 0.31<br>(0.25, 0.38) | 0.01<br>(-0.11,0.14)    | 0.27<br>(0.14, 0.41)  | 0.33<br>(0.27, 0.38) | 0.05<br>(-0.09,0.19)     | 0.92                    |
| Saturated fat, % of energy            | 10.5<br>(10.1, 10.8)                           | 10.5<br>(10.2, 10.9) | 0.1<br>(-0.4, 0.6)      | 11.2<br>(10.2, 12.3)               | 10.8<br>(10.4, 11.2) | -0.4<br>(-1.5, 0.7)     | 10.5<br>(9.7, 11.4)   | 11.1<br>(10.8, 11.4) | 0.6<br>(-0.3, 1.4)       | 0.44                    |

Abbreviations: AHA, American Heart Association; SNAP: Supplemental Nutrition Assistance Program

a. The mean change from 1999-2002 to 2011-2014 was statistically significant (\*p<0.05; \*\* p<0.01; \*\*\* p<0.001)

**eFigure 1a. Percent Change in Intake of AHA Dietary Components and Key Food Groups Among U.S. Adults by SNAP Participation Status, From 1999-2000 to 2013-2014**

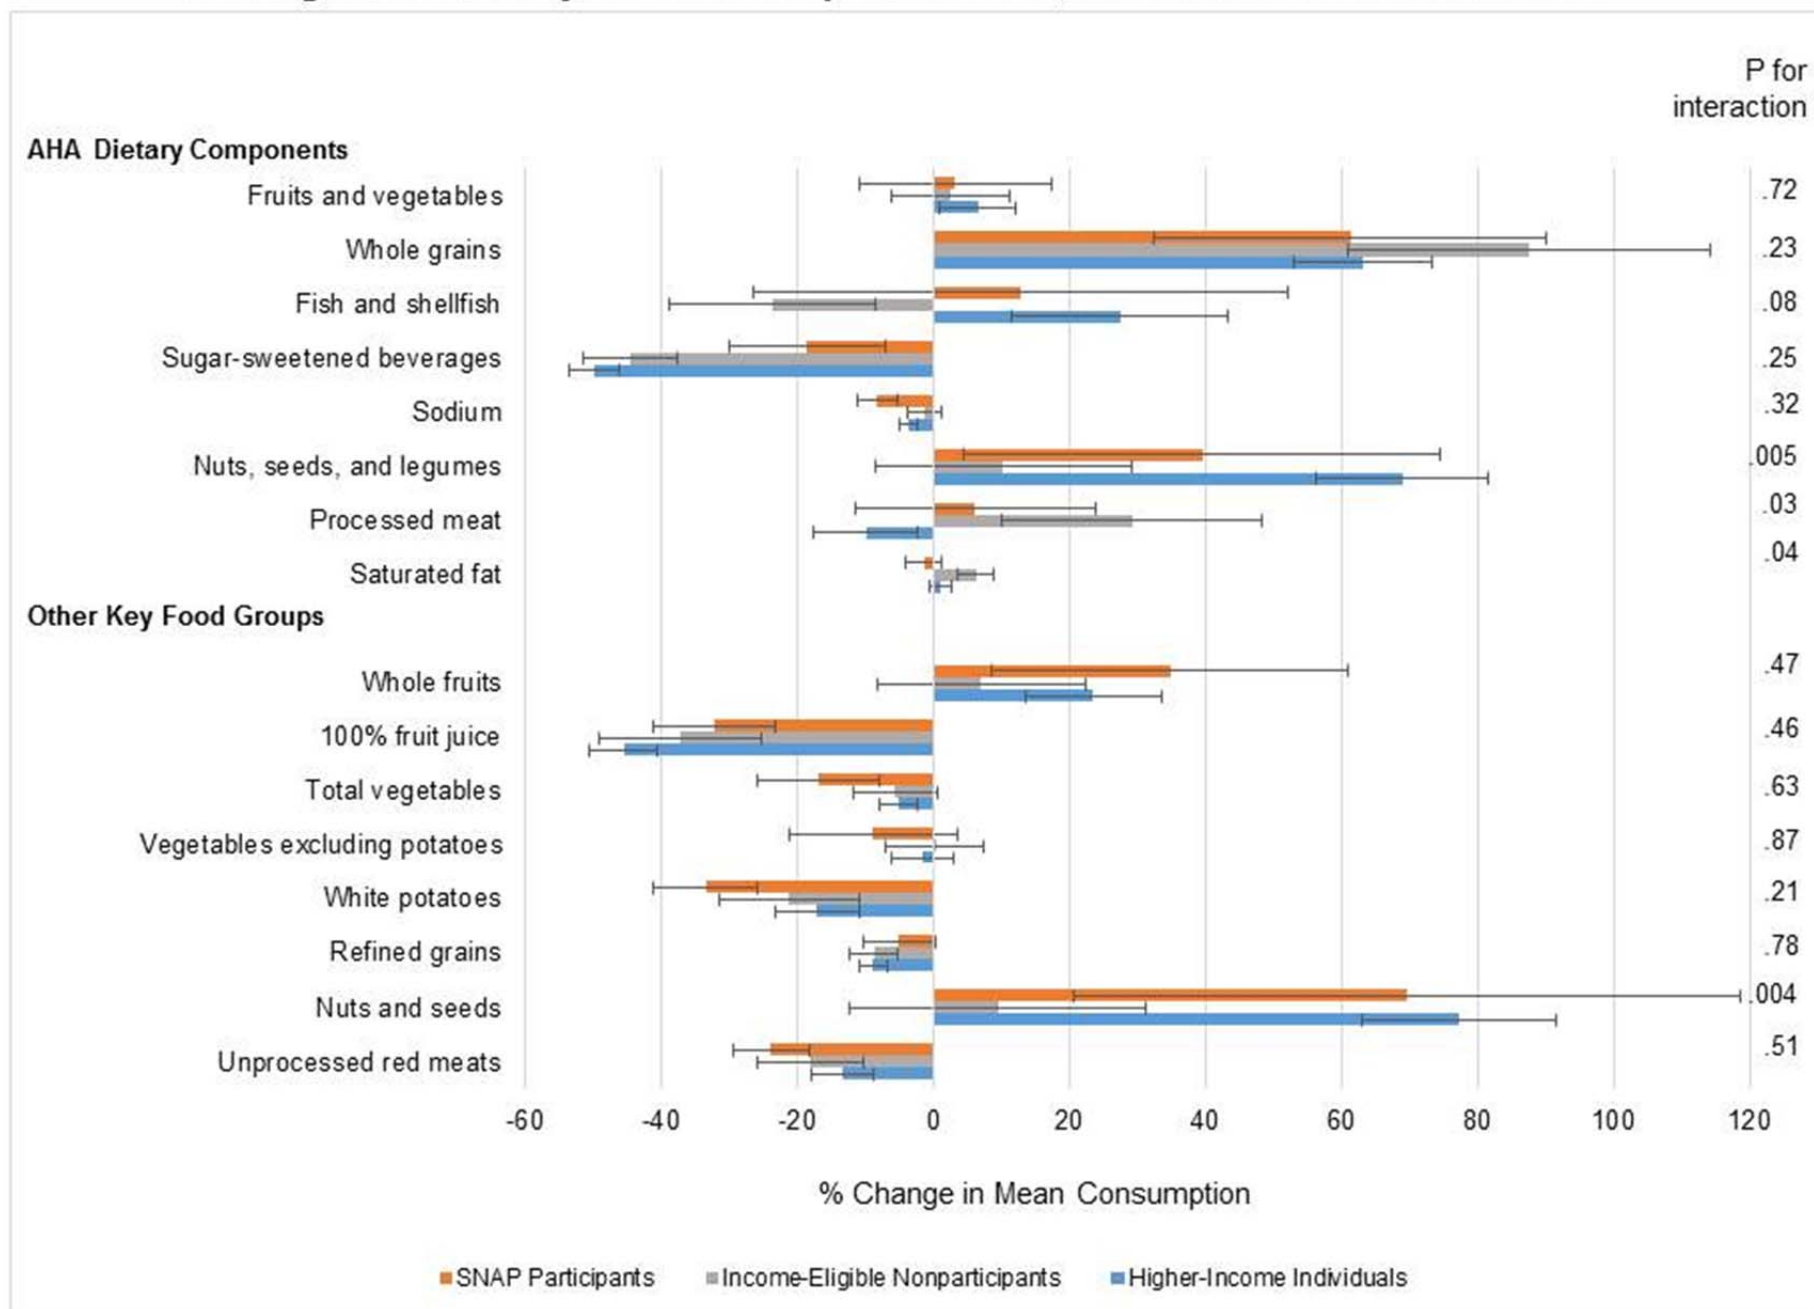

**eFigure 1b. Percent Change in Dietary Intake of Other Key Nutrients Among U.S. Adults by SNAP Participation Status, From 1999-2000 to 2013-2014**

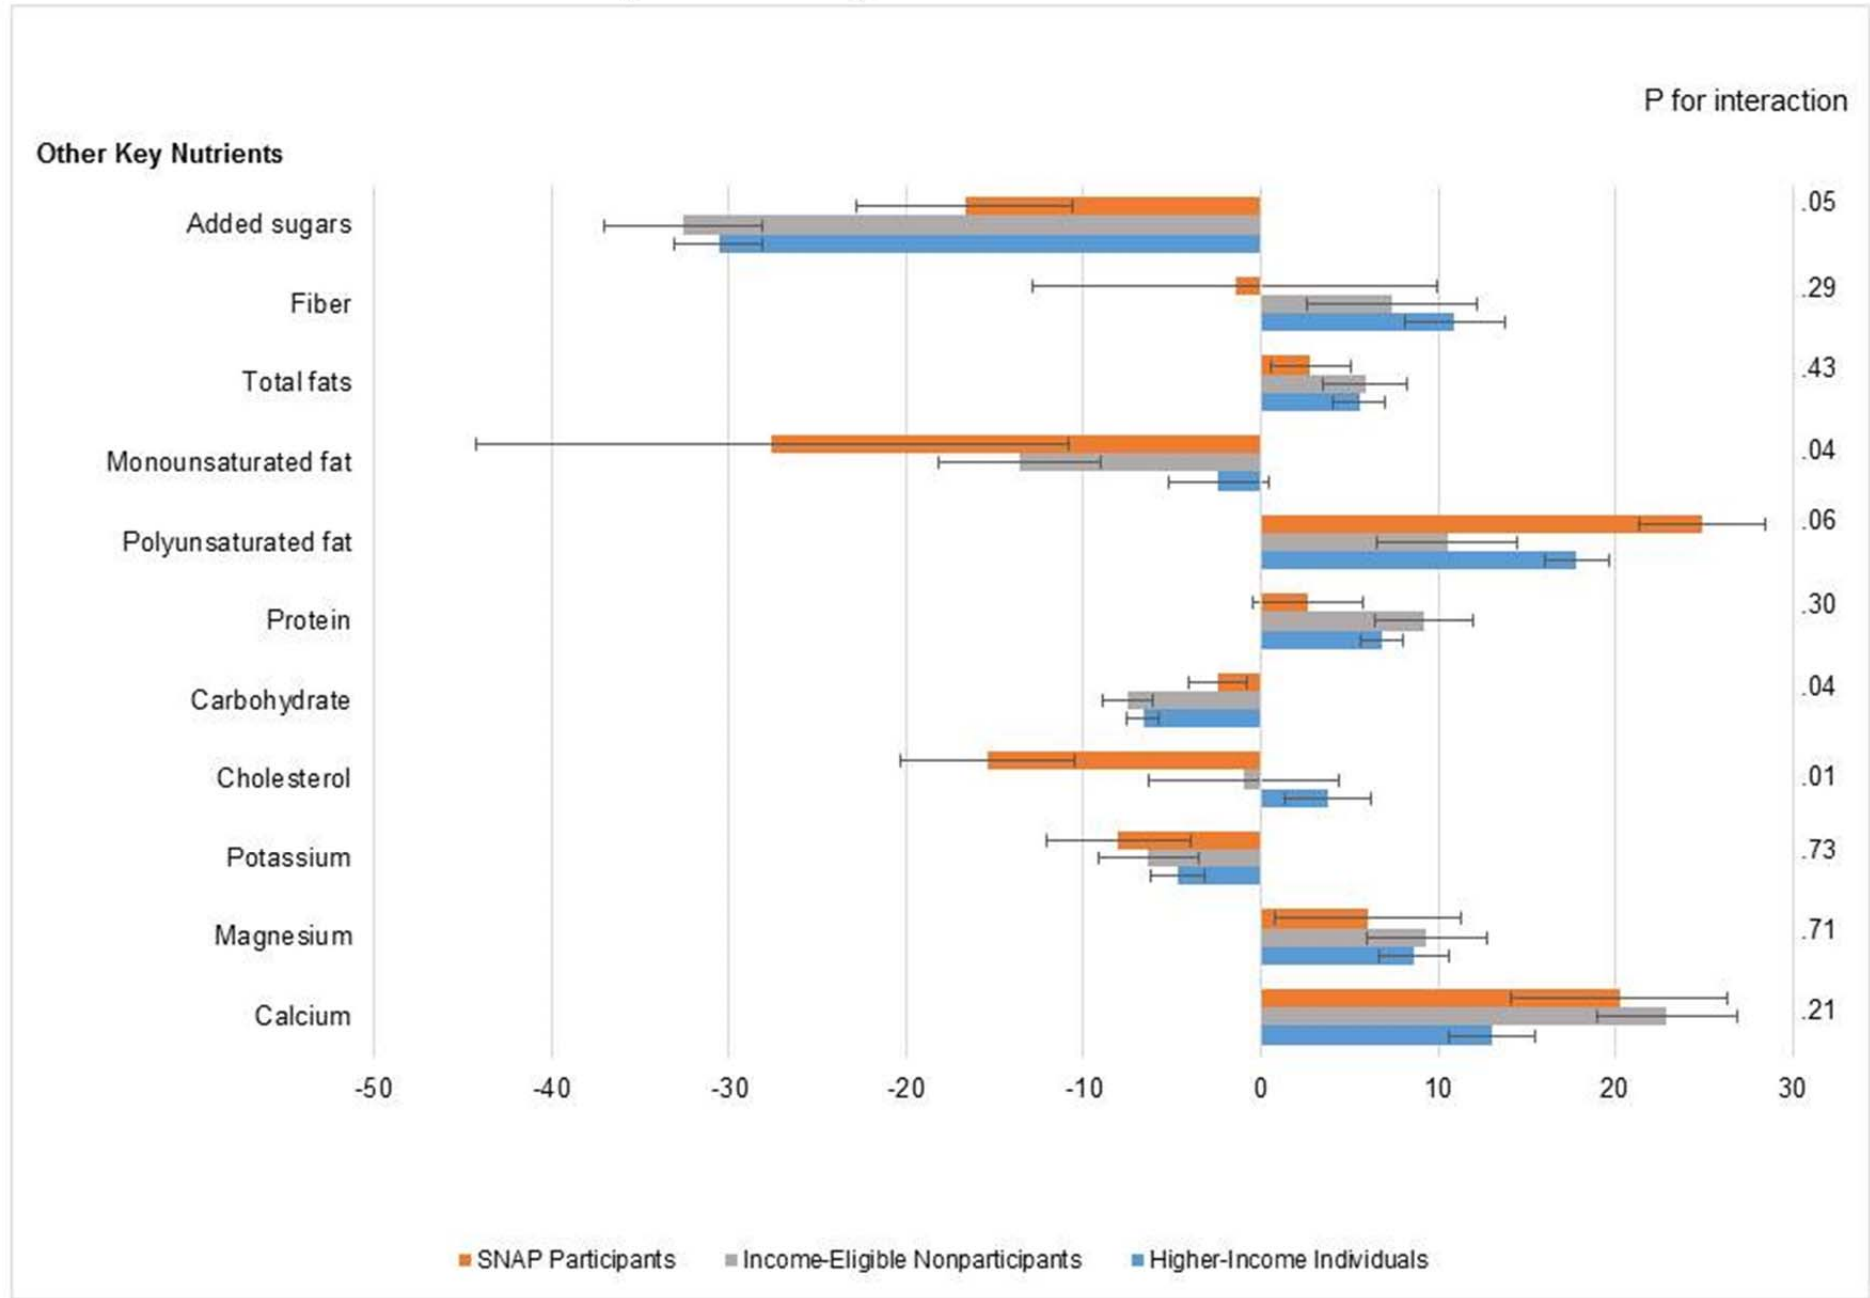

**eFigure 2a. Percent of US Adults Meeting Dietary Recommendations for AHA 2020 Strategic Goals by SNAP Participation Status, 2013-2014**

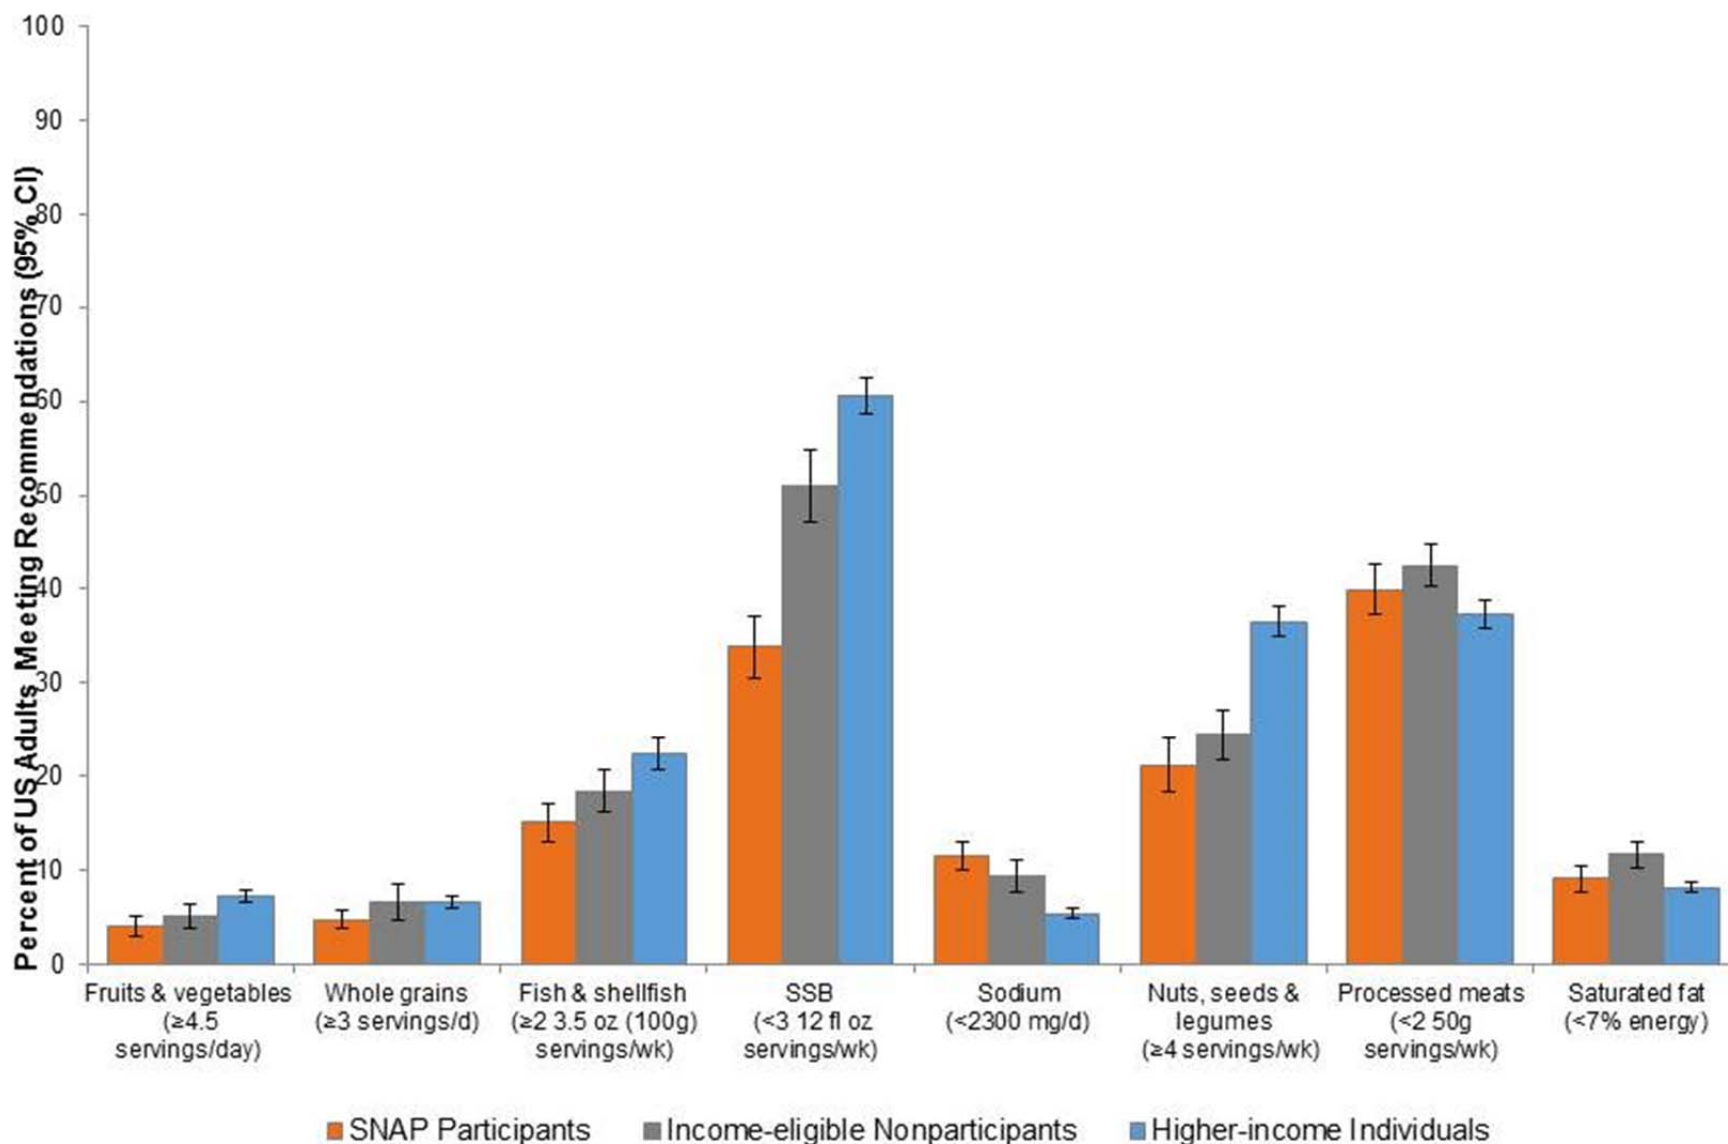

**eFigure 2b. Percent of US Adults Meeting Dietary Recommendations for Other Key Food Groups and Nutrients by SNAP Participation Status, 2013-2014**

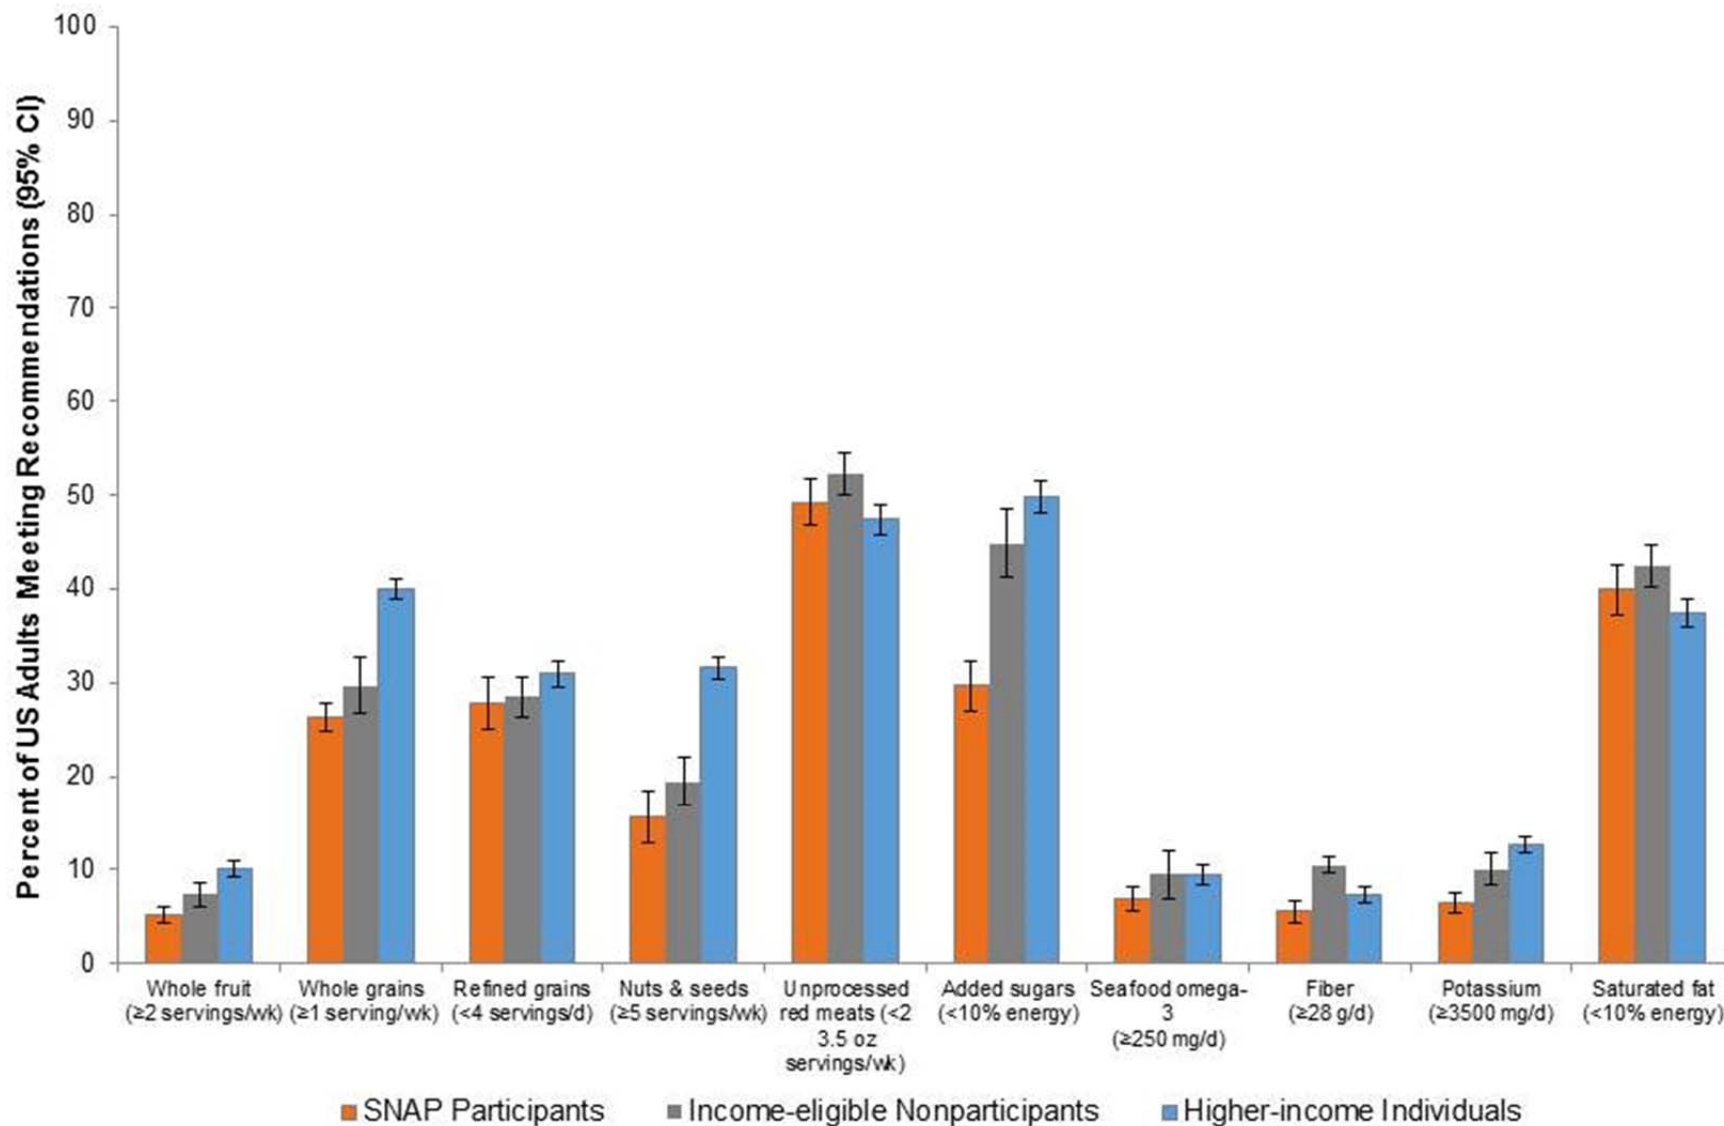

Supplement: jamanetwopen-1-e180237-s001.pdf [file jamanetwopen-1-e180237-s001.pdf]
